# Supplementary material
Source: PubMed Central journal article supplement (PMC4743034)
Supplement: NIHMS754231-supplement-Supplemental.pdf [file NIHMS754231-supplement-Supplemental.pdf]

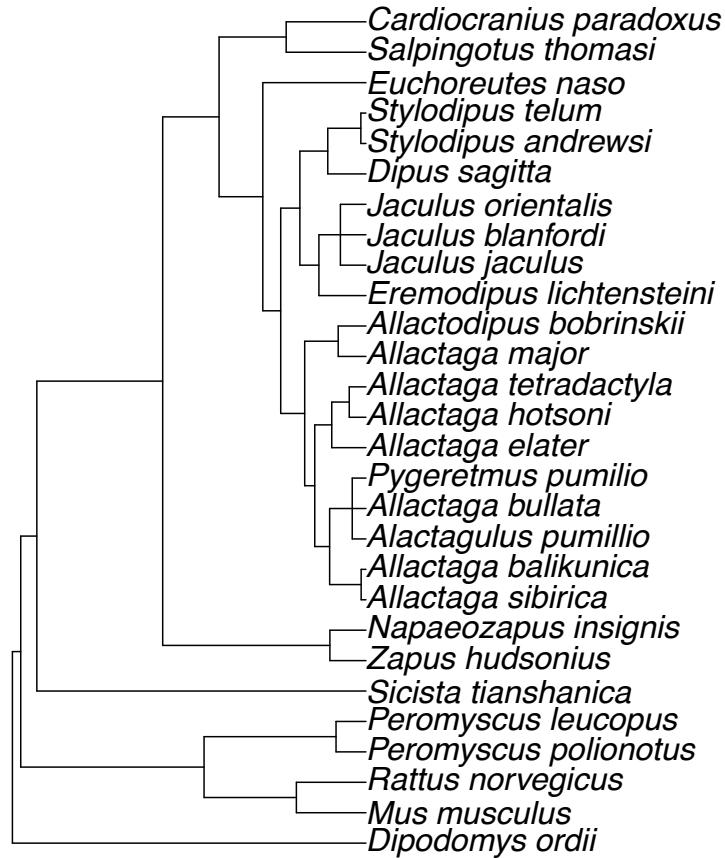

Figure S1: Time-calibrated phylogeny of Dipodoidea generated by processing the Nexus file below using Mr. Bayes. 23 Dipodoid and 5 outgroup taxa were included in this phylogeny. Supports Figure 3B.

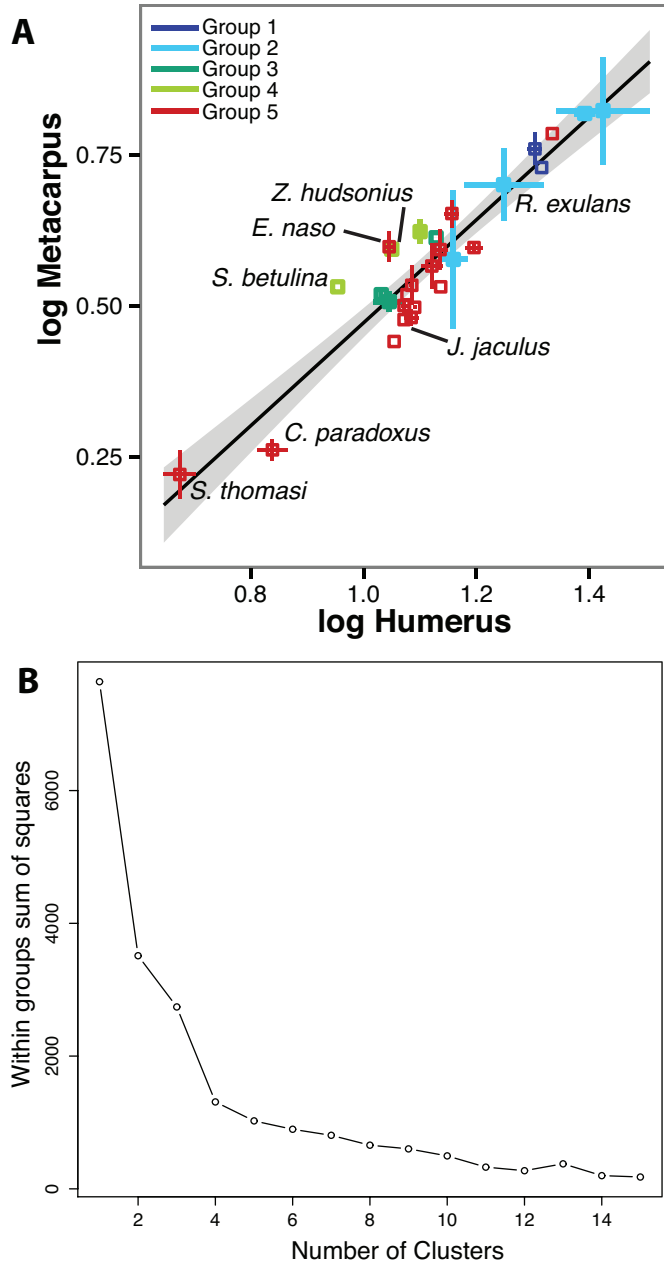

Figure S2. A) The humerus and third metacarpal scale near-isometrically for the ecomorphs identified by our clustering analysis. Log-log plot of the allometric scaling of humerus versus metacarpus. Linear regression: slope=0.853,  $p=1.322e-13$ , adjusted  $R^2=0.878$ . Colors correspond to ecomorph groups identified in Figure 4B. Grey shading indicates 95% confidence interval, and vertical and horizontal lines represent variation one standard deviation away from the mean. B) Kmeans cluster analysis illustrates the variation in limb proportions by pPC 2, 3, and 4 is best described using five clusters (least change in slope of the line after five clusters). Supports Figure 4.

Table S2. Vertebral lengths (in mm) and ratio of vertebra to previous vertebra

| Vertebra         | <i>J jaculus</i> 1<br>(mm) | <i>J jaculus</i> 2<br>(mm) | Average<br>(mm) | Ratio n/n-1 | <i>S betulina</i><br>(mm) | Ratio n/n-1 |
|------------------|----------------------------|----------------------------|-----------------|-------------|---------------------------|-------------|
| T1               | 1.42                       | 1.57                       | 1.5             | 1           | 0.57                      | 1           |
| T2               | 1.46                       | 1.57                       | 1.52            | 1.01        | 0.99                      | 1.74        |
| T3               | 1.72                       | 1.77                       | 1.75            | 1.15        | 1.11                      | 1.11        |
| T4               | 1.91                       | 1.75                       | 1.83            | 1.05        | 1.19                      | 1.08        |
| T5               | 2.02                       | 1.91                       | 1.97            | 1.07        | 1.17                      | 0.98        |
| T6               | 2.03                       | 2.21                       | 2.12            | 1.08        | 1.28                      | 1.09        |
| T7               | 2.03                       | 2.05                       | 2.04            | 0.96        | 1.28                      | 1.01        |
| T8               | 2.18                       | 2.24                       | 2.21            | 1.08        | 1.33                      | 1.03        |
| T9               | 2.59                       | 2.2                        | 2.4             | 1.08        | 1.43                      | 1.08        |
| T10              | 2.97                       | 2.42                       | 2.7             | 1.13        | 1.42                      | 0.99        |
| T11              | 2.96                       | 2.8                        | 2.88            | 1.07        | 1.41                      | 1           |
| T12              | 2.7                        | 2.32                       | 2.51            | 0.87        | 1.5                       | 1.06        |
| (T13)            |                            |                            |                 |             | 1.81                      | 1.21        |
| L1               | 3.24                       | 2.48                       | 2.86            | 1.14        | 2.11                      | 1.17        |
| L2               | 3.25                       | 3.25                       | 3.25            | 1.14        | 2.37                      | 1.12        |
| L3               | 3.99                       | 3.54                       | 3.77            | 1.16        | 2.45                      | 1.04        |
| L4               | 4.29                       | 4.1                        | 4.2             | 1.11        | 2.61                      | 1.06        |
| L5               | 4.29                       | 4.09                       | 4.19            | 1           | 2.42                      | 0.93        |
| L6               | 3.78                       | 3.62                       | 3.7             | 0.88        | 2.37                      | 0.98        |
|                  |                            |                            |                 |             |                           |             |
|                  | <i>J jaculus</i>           | <i>S betulina</i>          |                 |             |                           |             |
| Average thoracic | 2.12                       | 1.27                       |                 |             |                           |             |
| Average lumbar   | 3.59                       | 2.39                       |                 |             |                           |             |
| Thoracic /lumbar | 0.59                       | 0.53                       |                 |             |                           |             |

Table S3. Hindlimb morphotype classifications for all 51 species of Dipodoidea (summarized by genus) based on metatarsal fusion, number of digits, and limb allometry.

| Genus and number of species (sp) | Metatarsal fusion | Number of digits | Locomotion/<br>Limb Allometry<br>Group<br>(Fig 4B, 5) | Hindlimb morphotype<br>(Fig 2) |
|----------------------------------|-------------------|------------------|-------------------------------------------------------|--------------------------------|
| <b>Sicistinae</b>                |                   |                  |                                                       |                                |
| <i>Sicista</i> (13 sp)           | None              | 5                | Quadruped                                             | A                              |
| <b>Zapodidae</b>                 |                   |                  |                                                       |                                |
| <i>Eozapus</i> (1 sp)            | None              | 5                | Basal facultative biped                               | B                              |
| <i>Napaeozapus</i> (1 sp)        | None              | 5                | Basal facultative biped                               | B                              |
| <i>Zapus</i> (3 sp)              | None              | 5                | Basal facultative biped                               | B                              |
| <b>Cardiocraniinae</b>           |                   |                  |                                                       |                                |
| <i>Salpingotus</i> (5 sp)        | None              | 3                | Basal pygmy biped                                     | C                              |
| <i>Salpingotulus</i> (1 sp)      | None              | 3                | Basal pygmy biped                                     | C                              |
| <i>Cardiocranius</i> (1 sp)      | None              | 5                | Basal pygmy biped                                     | D                              |
| <b>Euchoreutinae</b>             |                   |                  |                                                       |                                |
| <i>Euchoreutes</i> (1 sp)        | Partial           | 5                | Basal biped                                           | E                              |
| <b>Allactaginae</b>              |                   |                  |                                                       |                                |
| <i>Allactaga tetradactyla</i>    | Full              | 4                | Derived biped                                         | F                              |
| <i>Allactaga</i> (11 sp)         | Full              | 5                | Derived biped                                         | G                              |
| <i>Pygeretmus</i> (3 sp)         | Full              | 5                | Derived biped                                         | G                              |
| <b>Dipodinae</b>                 |                   |                  |                                                       |                                |
| <i>Dipus</i> (1 sp)              | Full              | 3                | Derived biped                                         | H                              |
| <i>Eremodipus</i> (1 sp)         | Full              | 3                | Derived biped                                         | H                              |
| <i>Jaculus</i> (3 sp)            | Full              | 3                | Derived biped                                         | H                              |
| <i>Stylodipus</i> (3 sp)         | Full              | 3                | Derived biped                                         | H                              |
| <i>Paradipus</i> (3 sp)          | Full              | 3                | Derived biped                                         | H                              |

Table S4. Loadings (top) and species scores (bottom) from the phylogenetically-corrected Principal Components Analysis.

|                                | PC1          | PC2          | PC3          | PC4          |
|--------------------------------|--------------|--------------|--------------|--------------|
| humerus                        | -0.927962659 | 0.356347462  | 0.105019557  | -0.02954119  |
| femur                          | -0.988392059 | 0.106862461  | -0.062804684 | 0.087847158  |
| tibia                          | -0.988676775 | -0.061289937 | -0.119702004 | -0.066582349 |
| metatarsal                     | -0.905125775 | -0.415083981 | 0.091664625  | 0.00708643   |
|                                |              |              |              |              |
| <i>Allactaga_sibirica</i>      | -0.833498727 | -10.35657937 | -1.06648016  | 0.880361456  |
| <i>Allactaga_major</i>         | -10.39899369 | -9.765816326 | -1.038119269 | 0.938893537  |
| <i>Allactaga_bullata</i>       | 0.702943694  | -10.06921166 | -1.035308625 | 1.068422691  |
| <i>Allactaga_elater</i>        | 3.442629678  | -11.33156407 | -1.354898378 | 1.155256564  |
| <i>Allactaga_tetradactyla</i>  | 2.618551426  | -10.76311821 | -1.303189771 | 0.803366754  |
| <i>Jaculus_jaculus</i>         | 2.428835486  | -11.96420373 | -1.019793281 | 0.230172191  |
| <i>Jaculus_blanfordi</i>       | -0.740042387 | -11.4972549  | -0.972631483 | 0.295664309  |
| <i>Stylodipus_andrewsi</i>     | 3.452682919  | -9.502045937 | -1.287213984 | 1.706944543  |
| <i>Dipus_sagitta</i>           | 1.587425245  | -10.08717732 | -1.069563948 | 0.936617127  |
| <i>Euchoreutes_naso</i>        | 7.902322257  | -10.23825472 | 0.33567902   | -0.138128795 |
| <i>Salpingotus_koslovi</i>     | 30.28733374  | -7.963214022 | -1.32157391  | 0.614203907  |
| <i>Cardiocranius_paradoxus</i> | 20.82912937  | -7.920307289 | -0.749194601 | 0.977086321  |
| <i>Zapus_hudsonius</i>         | 16.27731228  | -4.411206318 | 1.593165947  | 0.608551562  |
| <i>Napaeozapus_insignis</i>    | 14.28267712  | -3.752875384 | 1.603025726  | 0.50488667   |
| <i>Sicista_betulina</i>        | 26.19246792  | -0.825554552 | 1.066899444  | 0.187256716  |
| <i>Microtus_pennsylvanicus</i> | 13.82091084  | 3.128606717  | 0.50192181   | -0.288222943 |
| <i>Microtus_mexicanus</i>      | 21.50728549  | 3.18689337   | 0.118065083  | 0.194682335  |
| <i>Microtus_arvalis</i>        | 24.68966035  | 2.924844468  | 1.262136072  | -0.309368234 |
| <i>Mesocricetus_brandti</i>    | 10.13057769  | 9.039933305  | -1.737488265 | 0.561997069  |
| <i>Mesocricetus_auratus</i>    | 13.6100043   | 7.012090742  | 0.019907347  | 1.170157765  |
| <i>Peromyscus_leucopus</i>     | 17.50003803  | 0.878632183  | 0.505103325  | 0.346229223  |
| <i>Peromyscus_polionotus</i>   | 22.64682191  | -0.065587696 | 1.226285782  | 0.619878336  |
| <i>Rattus_exulans</i>          | 10.32243591  | 1.31378492   | 0.006553186  | 0.251760162  |
| <i>Rattus_rattus</i>           | 4.656035714  | 2.156644903  | -0.057864511 | 0.432177148  |
| <i>Rattus_norvegicus</i>       | 2.710245132  | 2.754811174  | 0.63694964   | -0.017983533 |
| <i>Mus_musculus</i>            | 21.93967027  | 0.269771598  | 1.082439015  | 0.825438403  |
| <i>Acomys_russatus</i>         | 17.27645196  | 3.459604153  | -0.634706936 | 0.54861346   |
| <i>Spalax_ehrenbergi</i>       | 17.04856928  | 8.609635305  | -0.384676429 | 0.085116147  |
| <i>Rhizomys_pruinosus</i>      | -3.430436863 | 6.667702878  | 0.911769789  | 0.625133264  |
| <i>Anomalurus_beecrofti</i>    | -11.81791689 | 8.941832207  | -1.070598583 | -0.50411194  |
| <i>Pedetes_capensis</i>        | -20.24209142 | -4.157693636 | -1.701977913 | -1.121037362 |
| <i>Thomomys_bottaie</i>        | 8.521456161  | 4.065084169  | 1.219275488  | 0.517551453  |
| <i>Thomomys_umbrinus</i>       | 11.69965665  | 3.171629521  | 1.786969911  | 1.002643689  |

|                              |              |              |              |              |
|------------------------------|--------------|--------------|--------------|--------------|
| <i>Geomys_bursarius</i>      | 5.07194447   | 1.995062152  | -1.066298917 | 1.981288997  |
| <i>Dipodomys_ordii</i>       | 7.538328416  | -4.805912605 | -0.934676363 | 0.357178695  |
| <i>Dipodomys_spectabilis</i> | 0.608328366  | -4.281753454 | -1.476500694 | -0.185439194 |
| <i>Castor_canadensis</i>     | -17.81466575 | -1.029094077 | 2.041696055  | -1.054662598 |
| <i>Castor_fiber</i>          | -21.87861557 | -1.210462642 | 2.120834544  | -1.490736905 |

Table S5. ANCOVA for allometric scaling regression lines of quadrupeds and most derived of the bipeds.

| <b>ANCOVA Models</b>             | Lh        | Alpha       | Beta 2      | Beta 3      | Beta 4       | R <sup>2</sup> | s.e. Alpha | s.e. Beta-2 | s.e. Beta-3 | s.e. Beta-4 | Lambda    | Pval     | Preference for two lines |
|----------------------------------|-----------|-------------|-------------|-------------|--------------|----------------|------------|-------------|-------------|-------------|-----------|----------|--------------------------|
| Leg vs arm: Single line          | 19.197768 | 0.338402709 | 1.067845112 | -           | -            | 0.94509387     | 0.217688   | 0.056166    | -           | -           | 1         | 3.99E-14 |                          |
| Leg vs arm: Two lines            | 36.166265 | 0.0699296   | 1.071690265 | 1.129301469 | -0.092365784 | 0.996520147    | 0.068786   | 0.019941    | 0.288094    | 0.080001    | 0.0000001 | 4.35E-21 | 4E-08                    |
| Metatarsal vs femur: Single line | 32.667358 | 0.056812711 | 0.792952297 | -           | -            | 0.787746896    | 0.132546   | 0.08982     | -           | -           | 1         | 1.88E-08 |                          |
| Metatarsal vs femur: Two lines   | 40.708114 | 0.117630554 | 0.651398062 | 0.033229927 | 0.241302717  | 0.984655062    | 0.097666   | 0.074957    | 0.227384    | 0.15434     | 0.0000001 | 1.3E-15  | 3E-03                    |

Table S6. Statistical analysis of association of (log) element length with the nodes demonstrating punctuated evolution of the hindlimb.

| Punctuation Models   | Lh        | Alpha       | Beta 2      | R <sup>2</sup> | s.e. Alpha | s.e. Beta-2 | Lambda      | T-value     | d.f. | Pval        | Order | Critical Value | Adj Pval    |
|----------------------|-----------|-------------|-------------|----------------|------------|-------------|-------------|-------------|------|-------------|-------|----------------|-------------|
| Tibia vs nodes       | 24.167607 | 0.904784222 | 0.066880819 | 0.762270056    | 0.06989    | 0.007325    | 1.00E-07    | 9.130487213 | 24   | 1.41E-09    | 1     | 0.001666667    | 8.45E-09    |
| Femur vs nodes       | 21.437858 | 0.858605521 | 0.057473085 | 0.65745966     | 0.077627   | 0.008136    | 1.00E-07    | 7.064046814 | 24   | 1.33E-07    | 2     | 0.002          | 6.63E-07    |
| Metatarsals vs nodes | 22.457627 | 0.680702845 | 0.051933183 | 0.293375674    | 0.155472   | 0.015807    | 1           | 3.285454723 | 24   | 0.001560335 | 3     | 0.0025         | 0.006241339 |
| Ulna vs nodes        | 24.108331 | 0.96690848  | 0.030684674 | 0.164002748    | 0.131144   | 0.013587    | 0.962693417 | 2.258384782 | 24   | 0.016644107 | 4     | 0.003333333    | 0.049932322 |
| Humerus vs nodes     | 19.292325 | 0.835001406 | 0.033308963 | 0.153010398    | 0.146063   | 0.015369    | 0.91857176  | 2.167282366 | 24   | 0.020179452 | 5     | 0.005          | 0.040358904 |
| Metacarpals vs nodes | 19.403949 | 0.42321027  | 0.019112974 | 0.052009299    | 0.15381    | 0.016003    | 0.951986213 | 1.194336957 | 24   | 0.122008513 | 6     | 0.01           | 0.122008513 |



**Supplemental Experimental Procedure. Nexus file for tree constructed of 28 Myomorpha including 23 Dipodoidea.**

```
#NEXUS
BEGIN DATA;
  DIMENSIONS NTAX=28 NCHAR=5741;
  FORMAT DATATYPE = DNA GAP = - MISSING = ?;
  MATRIX
  Mus_musculus
CTCTTACCATTTCGGCAATGCGCTGGTAATTCTGGCTGTGTTGACCAGCCGCTCTCTCCGTGC
ACCACAAAACCTCTTCCTGGTGTCACTGGCAGCAGCCGACATCCTAGTGGTACTCTTATCATCC
CTTTCTCTCTGGCCAACGAGCTGCTGGGCTATTGGTACTTCTGGCGTGCGTGGTGGGAGGTCTAC
CTGGCGCTAGACGTGCTCTTCTGTACCTCCTCCATCGTGCACCTGTGTGCCATCAGTCTGGACAG
ATACTGGGCAGTGAGCCGAGCATTGGAGTACAACCTCCAAGCGCACTCCACGCCGATCAAATGCA
TCATCCTCACCGTGTGGCTCATTGCAGCCGTCATTTCTCTACCGCCCTCATCTACAAGGGCGACC
AGCGCCCAGAGCCCCACGGGCTCCCCAGTGTGAGCTCAACCAAGAAGCCTGGTACATCTTGGCT
TCCAGCATCGGATCTTTTTTTGCTccctgectcatcatg-attctcgt-----
TTTATGGACATGGAGTGCTTCATGATTCTGAATCCCAGCCAGCAGCTGGCCATCGCTGTCCTGTC
CCTCACCTGGGCACCTTCACGGTCTGGAGAACCTGCTGGTGCTATGTGTCATCCTTCACTCCC
CAGTCTCCGATGCAGGCCTTCTACCACTTCAATTGGCAGCCTGGCGGTGGCCGATCTCCTGGGAA
GTGTCATCTTTGTCTACAGCTTTGTTGACTTCCACGTGTTCCACCGCAAAGATAGTCCCAATGTG
TTTCTGTTCAAACCTGGGTGGGGTTACCGCCTCCTTACAGCATCTGTGGCAGCCTGTTCCCTCAC
GGCCATCGACAGGTACATATCCATTCACAGGCCTCTGGCCTATAAGAGGATCGTCACCAGGCCCA
AGGCCGTAGTGGCCTTTTGCTTGATGTGGACTATTGCAATAGTAATTGCTGTGTTGcctctcctgggc
tggaaactgcaGCGGATGAGAAGACTGAAGGGTCTGACACAGACAGACTTCTAAGCAATGATCA---
TGAGAAATCAGCTGGTATCCTTGGAGCAAAGGATGATGATTCTGGGCGTACCAGCTGTTACGACC
CTGACATTTTGGATACTGATTTCCATAACCAGTGACATGTGTGATGGTACCTTGAAGTTTGCTCAG
TCACAGAAGTTAAATATGGAAGCTGATCTCTTGTGCCTTGATCAGAAGAATCTGAAGAACTTGC
CTTA---TGATGCTTCCCTTG---
GCTCTCTGCATCCCTCCATTACCCAGACAGTAGAAGAAAACAAGCCACAGCCACTTTTGGAGCAGC
GAAACTGAGGCAACCCACCAACTCGCCTCTACACCGATGAGTAATCCCACATCACTGGCAAACAT
TGACTTTTATGCCAAGTAAGCGACATTACACCAGCAGGTGGTGTAGTCCTTTCCCCAGGCCAAA
AGATTAAGGCAGGGATAGCCCAAGGCAATACCCAGC-----
GGGAGGTGGCCACGCCCTGCCAAGAAAATTACAGCATGAACAGTGCCTACTTTTGTGAGTCAGAT
GCCAAAAAATGCATC-GCTGTGGCCCCTCGCATGGAAGCCACGTCTTGTATAAAA---
CCAAgctttaaccTACGAGCCCAGTAC---
CCTCGAGGCTCCCAGCAAGCACCAGTGCTCACCAACCTCACCCGAGAAGAAGTGTGGCCGAGA
TACAGAGGAACATCCGCCATGAGGTTCTTGAGGGCAATGTGGGCTACCTACGAGTGGATGACCTC
CCTGGCCAGGAGTACTGAGCGAGCTGGGGGAGTTCTTAGTGAGCCATGTGTGGAGGCAGCTCAT
GGGCACCTCCTCCTTGGTGTAGATCTCCGGCACTGCTCTGGCGGCCACTTCTCTGGGATCCCTTA
TGTCATCTCTTACTTGCACCCTGGGAACACGGTCATGCACGTGGACACCGTCTACGATCGGCCCT
CCAACACCACCACAGAGATCTGGACCTTGCCCGAGGTCTCGGGGAGAGATACAGTGCTGACAAG
GATGTGGTGGTCCCTCACCAGTGGACACACTGGGGGAGTCGAGAGGACATTGCCTACATCCTGAA
GCAGATGCGGCGGCCATCGTGGTGGGCGAGCGGACGGAGGGTGGGGCCCTGGACCTCcgaaa-----
-----
```

ACGACTTCCCCCTGGATGCTCCCAGCCCCTCACGTGTGGCCTGAAGACCATGTGTTCATTTCCACA  
CCAAACTTCAACTACACCGTCCAAGACTTTGAGCGTTTTTTCACAGATCTGCATTTTGAAGAAGG  
CTGGCACATGTTTCTTCAGTCTCGTGACCTACTGGAGCGCTCCCCGCACCTGGTGTAGAAGTAT  
ATTGTCTCTACGGTGTGGGCAGACCCACACCCACACCTACATCTATGACCACAACTTCCCCTAC  
AAAGACCCCGTGGCTGCACTCTATGAAGATGGGGACGACACCGTAGCCACCCGCAGCACTGAGCtc  
tgtggccagtggcagggccgcca-----

-----  
ATAGCAGTGAGCCAGCAGAGCAGATGGGCTGCAAGTAAAGGAACATGTAACGACAGGCAGGTTCC  
CCAGCACTGGGGAAAAGGTAGGTCCAACCGCTGACTCCCTTAGTGATAGAGAGAAGTGGACTCA  
CCCGCAAAGTCTGTGCCCTGAGAATTCTGGAGCTACCACCGATGTTCCCTGGATAACACTAAATA  
GCAGCGTTCAGAAAGTTAATGAGTGGTTTTCCAGAACTGGTGAAATGTTAACTTCTGACAGCGC  
ATCTGCCAGGAGGCACGAGTCAAATGCTGAAGCAGCTGTTGTGTTGGAAGTTTCAAACGAAGTG  
GATGGGGTTTTAGTTCCTCAAGGAAAACAGACTTAGTAACCCCGACCCCATCATACTTTAAT  
GTGTA AAAAGTGAAGAGACTTCTCAAACCAGTAGAGGATAATATCAGTGATAAAAATATTTGGG  
AAATCCTATC---AGAGAAAGGGAAGCCGCCCTCACCTGAACCATGTGACTGAAA-----

TTATAGGCACATTTATTACAGAACCACAGATaacacaagagcagcccT-----GGCA-----  
AACTGATGCCCCAGTCAGCTCTACCACCCCATATGTTGAGGATACCCCGAGCCCCCCTGCACAA  
CTTCTACTGCAGCAAGCTGCTGGATCTTGTCTTCTGCTGGATGGCTCCTCTATGTTGTCCGAGG  
CTGAGTTTGAAGTGCTCAAAGCTTTTTGTGGTGGGCATGATGGAGAGGTTACACATCTCTCAGAA  
GCGCATCCGCGTGGCAGTGGTAGAGTACCATGATGGCTCCCGTGCCTACCTTGAGCTCAAGGCC  
GGAAGCGACCCTCAGAGCTTCGGCGCATCACCAGCCAGATTAAGTATACAGGCAGCCAGGTGGCC  
TCTACCAGTGAGGTTTTGAAGTACACACTGTTCCAGATCTTTGGCAA AATTGACCGCCCTGAAGC  
CTCCCATATCACTCTGCTCCTGACTGCTAGCCAGGAGCCCCACGGATGGCTAGGAATTTG-----  
-GTCGCTATGTC-----

caaggtctgGCCGTGGGTTTTCCAGCCTTCATAAAAAAGCAGCCGAAGTACCTCAAATTGGGAGCCA  
TTGATGTTGAGCGCCTGAAGAACACACCGGTCAAATCTTCAGAAGGATCTCAGCAAAGAGCCCA  
TCATATCCAGTGACTCCACAACCATGTTACCATAGAGGGCATGCATTGTAAATCGTGTGTGTC  
CAATATTGAAAGTGCTTTATCTACACTCCAGTATGTAAGCAGTATAGTAGTTTCTTTAGAGAAT  
AGGTGAGCCATTGTAAAGTACAATGCAAGCTTAGTCACTCCAGAAATGCTGAGAAAGGCAATAG  
AGGCCATTTACCGGGGCAATACAGAGTTAGTATTGCAAGTGAAGTTGAAAGTACCGCCAGCTCT  
C---  
CCTCCAGCTCATCTCTTCAGAAGATGCCTTTGAACATAGTTAGCCAGCCTCTGACCCAAGAAGCT  
GTGATAAACATAAATGGCATGACTTGTAATCTTGTGTGCAGTCTATAGAGGGTGTAATATCAA  
AAAAGCCAGGTGTAAAAtccatc---cacgtgtccctcgcaaacagcacagggactattgaattgatcctact-----  
-----

GCAGAGTAACTGTGTTTTGATTTGGACCTTGTTGACTGTGAACCTCTAATCGGGGCAGGCGATGCA  
GCA--TCCTCATAATGGCCATGTGGACTTGTAGATGGGTCTCT--  
TAACCCTTGCTTAAGAATACAGTCTGCTGTAGAGTG-----  
TGAATTGGGAATACTGTTCCATGGGTTGGAATGCAGCTCCCCCACA-TTACCAAGCTTGCT-  
CTA-----TTGCCAATAGCATGCAACA-----TATG-  
TTTTGTTTGCCCTTCTGCTTCTACTTTTTTTCAGGGAAGCTGCTAAAGAATGTCGACGTGCAAAGA  
AAGAGTATGTGAAGTGTCTTGAGAGTcgagtcgagtgctggaagttcagaac-  
aagaagcttatagaggagcttgaaact-----

ATTTATATCATGTCTGTGCTTGCAAGAATAACAAAAAAGTTACTTTCCGTTGCACAGAGAAAAG  
ACTTAGTAGGAGATGTCCCTGAACCCAGATACGGCCATTCCATTGACGTGGTGTATAGTCCGAGGG  
AAAAGCATGGGTGTTCTCTTTGGAGGACGATCATACATGCCTTCTACCCAGAGAACCACAGAAAA

ATGGAATAGTGTAGCTGACTGCCTACCCCATGTTTTCTTGATAGATTTTGAATTTGGGTGTGCTA  
CATCATATATTCTCCAGAACTTCAGGATGGGCTGTCTTTTCATGTTTCTATTGCCAGAAACGAT  
ACCGTTTATATTTTGGGAGGACACTCACTTGCCAGTAATATACGCCCTGCTAACTTGTATAGAAT  
AAGAGTGGACCTTCCcctgggtaccccagcagtgaattgcacagtcttgGAGGAACAGCGGGTGGGAGGTGGC  
AGCGAGGGGGAGAGTAGCCACGGGG---ACGGTTCTGAGTTCGATGAT---  
GAAGGGATGCAGAGCGACGACCCCGAGAGTACCAGGA---  
GCGATCGAGGCCACGCCAGAATGAGCAGCGCTGGTATCAGGTCGGAAGAATCTAAAGGGGACCA  
CGAGCCCACGAGCACTCAGGATTCAGATGACAGCCAGTCTGTGGAATTTTCAAGCAGGAAGTCCT  
TCAGAAGGTCCCACGTCTCTGAGGAAGACTACAGAGGTGAGCTTACTGACAGCAACAGCAG---  
GGAAACCCAGAGCGACTCCACGGAGGATAC-----GGCC--  
TCCAAGGAGGAAAGCAGGAGCGAGTCTCAGGAGGACACAGCCGAGAGCCAGTCCCAGGAAGATA  
GCCAGAGGGGCAAGACCCAGCAGTGAGTCCAGC---GAAGAGGCTGGTGAGCCAT

*Rattus\_norvegicus*

CTTTTCACCATTTTCGGCAATGCGCTGGTCATTCTGGCTGTGTTGACCAGCCGCTCACTCCGTGC  
ACCACAAAACCTGTTCCCTGGTGTCACTGGCAGCAGCCGACATCCTAGTGGCTACTCTCATCATCC  
CTTTCTCTCTGGCCAACGAGCTGCTGGGCTACTGGTACTTCTGGCGTGCGTGGTGGGAGGTCTAC  
CTGGCGCTAGACGTGCTCTTCTGTACCTCCTCCATCGTGACCTGTGTGCCATCAGCCTGGACAG  
GTACTGGGCAGTGAGCCGAGCATTGGAGTACAACCTCCAAGCGCACTCCGTGCCGCATCAAGTGCA  
TCATCCTCACTGTGTGGCTCATTGCAGCTGTCAATTTCTCTACCGCCCCTCATCTACAAGGGCGACC  
AACGCCCCGACGCCCCGCGGGCTCCCCAGTGTGAGCTCAACCAGGAGGCCTGGTACATCTTGGCT  
TCCAGCATCGGATCTTTTTTTGCTCCCTGCCTCATCATG-ATCCTCGT-----  
TTTATGGACATGGAGTGCTTTATGATTCTGAATCCCAGCCAGCAGCTGGCCATCGCTGTACTGTC  
CCTCACACTGGGCACCTTACGGTTCTGGAGAACCTACTGGTGTGTGTGTCATCCTGCACTCCC  
GCAGTCTCCGATGCAGGCCCTTCCCTACCACTTCATCGGCAGCCTGGCAGTGGCCGACCTCCTGGGA  
AGTGTCAATTTTTGTGTACAGCTTTGTTGACTTCCATGTATTCCACCGTAAAGACAGCCCCAATGT  
GTTTCTGTTCAAACCTGGGTGGGGTTACAGCCTCCTTACAGCTTCTGTGGGCAGCCTGTTCTCA  
CAGCCATCGACAGGTACATATCCATTACAGGCCCTTGGCCTATAAGAGGATCGTCACCAGGCCC  
AAGGCCGTTGTGGCCTTTTGCCTGATGTGGACTATCGCAATAGTAATCGCTGTGTTGCCTCTCCT  
GGGCTGGAAGTGCAGCGGATGAGAAGACTGAAGAGTCAGACACCGACAGACTTCTAAGCGATGA  
CCA---  
GGAGAAATCAGCTGGTATCCTTGGAGCAAAGGATGACGATTCTGGACGTACCAGCTGTTATGAC  
CCTGACATTTTGGATACCGATTTCCACACCAGTGACATGTGCGATGGTACCTCGGAGTTTGTCA  
GCCGACAGGTTAAAAGCAGAAGCTGATCTCTTGTGCCTTGACCAGAAGAATCTGAAGAAGTCCG  
CCTTA---TGATGCTTCCCTTG---GCTCTCTGCACCCCTCCATTACCCTGAC---  
AATGGAAGACAAACCACAGCCACTTCTGGGCAGTGAAACTGAGTCAACCCACCAACTCCCCTCTA  
CACCAATGAGCAGTCCCGTGTCACTGGCAAACATGACTTTTATGCCAAGTAAGCGACATTACA  
CCAGCAGGTGGTGTAGTCCTTTCTCCAGGCCAAAAGATTAAGGCAGGGTTAGCCCAGGGCAACAC  
CCAGC-----  
TGGAGGTGGCCGCGCCCTGCCAAGAAAATTACAGCATGAACAGTGCCTACTTCTGTGAGTCAGAT  
GCCAAAAGTGCATC-GCTGCGGCCCTCACATGGAGGCCACGACATGTGTAATAA---  
CCAAGCTTTAACCTATGAGCCCAGTAC---  
CCTCGAGGCCCCCAGCAAGCACCAGCACTCACCGACCTCACCCGAGAAGAGCTGCTGGCCGAGA  
TACAGAGGAACATCCGCCATGAGGTTCTTGAGGATAACGTGGGCTACCTACGAGTGGATGATCTC  
CCTGGACAGGAGTACTGAGTGAGCTGGGGGAGTTCTAGTGAGCCATGTGTGGAAGCAGCTCA  
CGGGCACCTCCTCCTTGGTGCTAGATCTCCGTCACTGTGCTGGTGGTCATGTCTCTGGGATCCCTT  
ATGTCATCTCCTACTTGCACCCTGGGAACACAGTCTTGCACGTGGATAACCATCTACGATCGGCC

TCCAACACCACCACAGAGATCTGGACCTTGCCTAAGGTCTGGGGGAGAGATACAGTGCAGACAA  
GGATGTGGTGGTCCTCACCAGTGGACACACTGGGGGAGTAGCCGAGGACATCGTTACATCCTCA  
AGCAGATGCGCAGGGCCATCGTGGTGGGTGAGCGGACGGAGGGTGGCGCCCTGGACCTCAGAA--

-----  
ACAACCTCCCCCTGGATGTTTCCAGCTCACCACGTGTGGCCTGAAGACCACGTGTTTCATTTCCAC  
ACCAAACCTTCAACTACACAGGCCAAGACTTCGAGCGTTTTTTTTGCAGATCTTCATTTTGAAGAAG  
GCTGGCACATGTTTCTACAGTCTCGTGACCTACTAGCAGGCCTCCAGCGCCTGGTGTAGAAGTA  
TATTGTCTATACGGTGTAGGCATGCCACAGCCCACACCTACATCTATGACCACAACCTTTCCCTA  
CAAAGACCCGGTGGCTGCACTCTATGAAGATGGGGACGACACTGTAGCCACACGTAGCACTGAGC  
TCTGTGGCCAGTGGCAGGGCCGCCA-----

-----  
GCAGCAGTGAGCCAGCAGAGCAGATGGGCTGACAGTAAAGAAACATGTAATGGCAGGCCGGTTC  
CCCGCACTGAGGGAAAGGCAGATCCAAATGTGGATTCCCTCTGTGGTAGAAAGCAGTGGAAATCA  
TCCGAAAAGCCTGTGCCCTGAGAATTCTGGAGCTACCACTGACGTTCTTGGATAACACTGAATA  
GCAGCATTCAGAAAGTGAATGAGTGGTTTTCCAGAACTGGTGAAATGTTAACTTCTGACAATGC  
ATCTGACAGGAGGCCTGCGTCAAATGCAGAAGCTGCTGTTGTGTTAGAAGTTTCAAATGAAGTG  
GATGGATGTTTCAGTTCCTCAAAGAAAATAGACTTAGTTGCCCTGATCCCGATAATGCTGTAAT  
GTGTACAAGTGAAGAGACTTCTCCAAGCCAGTAGAGAATATTATCAACGATAAAAATATTTGGG  
AAAACCTATC---AGAGAAAGGGAAGCCGCCCTCACTTGAACCATGTGACTGAAA-----

TTATAGGCACATTTACTACAGAACCACAGATTATACAAGAGCAGCCCT-----GGTA-----  
AACAGATGCCCCAGTCAGCTCCACCACCCCATATGTTGAGGACACCCCCGAACCCCCCTGCACAA  
CTTCTACTGCAGCAAGCTGCTGGATCTCGTCTTCCCTCCTGGATGGCTCCTACAGGCTGTCTGAGG  
CTGAGTTTGAAGTGCTCAAAGCTTTTTGTGGTGGGTACGATGGAGAGGCTACACATCTCTCAGAA  
GCGCATCCGCGTGGCAGTGGTAGAGTACCATGATGGCTCCCATGCCTACCTTGAGCTCAGGGCCC  
GGAAGCGACCCTCAGAGCTTCGGCGCATCGCCAGCCAGATTAAGTATGTGGGCAGCCAGTTGGCC  
TCTACCAGTGAGGTTTTGAAGTACACACTGTTCCAGATCTTTGGCAAATTGACCGTCTGAAGC  
CTCCCGTGTCAATCTGCTCCTGACCGCTAGCCAGGAGCCCCAACGGATGGCTAGGTATTTTC-----  
-ACCCGCTATCTC-----

CAAGGTTTCGCTGTGGGTTTTCCAGCCTTCATAAAAAAACAGCCAAAGTACCTCAAATTTGGGAGC  
CATTGACGTTGAGCGCCTGAAGAGTACACCAGTCAAATCTTCAAGAGGATCTCAGCAAAAGAGCC  
CAGCGTATCCCAGTGACTCAGCAATCACATTTACCATAGACGGCATGCATTGTAATCATGTGTG  
TCAAATATCGAAAGTGCTTTATCTACACTCCAGTATGTAAGCAGCATAGTAGTTTCTTTAGAGA  
ATAGGTCAGCCATTGTAAGTACAATGCAAGCTTAGTCACTCCAGAAATACTGAGAAAAGCGAT  
AGAGGCCGTTTTCTCAGGGCAATACAGAGTTAGTATTTCAAGTGAAGTTGAAAGTCCCACCAGCT  
CTC---

CCTCCAGCTCATCTCTTCAGAAGATGCCTTTGAACTTAGTGAGCCAGCCTCTGACCCAAGAAGTT  
GTAATCAACATTAATGGCATGACTTGTAATCTTGTGTGCAGTCGATAGAGGGTGTAAATATCGA  
AGAAGCCAGGTGTAATAATCCATC---  
CAGTTTTCCCTCACAAATAGCACCGGGACTATTGAATATGATCCTCTACT-----

-----  
GCAGAGTAACTGTGTTTGACTTGGACCTGGTTGACTGTGAACTCTAAT-  
GGGGCAGGCGATGCAGCA--TCCTCGTAATGGCCATATGGACTTGTAGATGGGTCTCT--  
TAACCCTTGCTTAAGAATACAGTCTGCTGTAGGGTG-----  
TGAATTTGGAACTGTTCCACGGGTGCGAATGCAGCTCTCCTCCA-TTACCAAGCTTGCT-  
CTA-----TTGCCAATAGCATGCAACA-----TACG-  
TTTTGTTTGCCTTCTGCTTCTACTTTTTTTCAGGGAAAGCTGCTAAAGAATGTCGACGTGAAAGA

AAGAGTATGTGAAGTGTCTGGAGAGCCGAGTCGCAGTGCTGGAAGTTCAGAAC-  
AAGAAGCTTATAGAGGAGCTTCAAACC-----  
ATTTATATCATGTCTGTCGCTTGCAAGAATAACAAAAAAGTACTTTCCGTTGTACAGAGAAAG  
ACTTAGTAGGAGATGTCCCTGAAGCCAGATATGGCCATTCCATTGACGTGGTATATAGCCGAGG  
AAAAAGTGTGGTGTCTCTTTGGAGGACGGTCATACATGCCTTCTACCCAAAGAACCACAGAAA  
AATGGAATAGTGTAGCTGATTGCCTACCCCATGTTTTCTTGGTAGATTTTGAATTTGGGTGTGCT  
ACGTCATATATTCTCCCAGAACTTCAGGACGGGCTGTCTTTTCATGTTTCTATTGCCAGAAATGA  
TACCATTTATATTTTGGGAGGACACTCACTTGCCAGTAACATACGTCCTGCTAACTTGTATAGAA  
TAAGAGTAGATCTTCCCCTGGGTACCCAGCAGTGAATTGCACTGTCTTGGAGGAATATCGGGTA  
GGAGGTGGCAGCGAGGGGGAGAGTAGCCACGGGG---ACGGCTCTGAGTTCGATGAT---  
GAGGGGATGCAGAGCGATGATCCCGGGAGCACCAGGA---  
GCGATCGAGGCCATACCCGAATGAGCAGCGCTGGTATCAGGTCGGAAGAATCTAAAGGGGATCA  
CGAGCCCACGAGCACTCAGGATTCAGATGACAGCCAGGATGTGGAATTTTCAAGCAGGAAATCCT  
TCAGAAGGTCCCGGGTCTCTGAGGAAGACGACAGAGGCGAGCTCGCTGACAGCAACAGCAG---  
GGAAACCCAGAGCGACTCCACAGAGGATTT-----  
CCGCTCCAAGGAGGAAAGCAGGAGCGGAGACTCAAGAGGACACAGCCGAGACCCAGTCCCAGGAA  
GATAGCCCAGAGGGACAAGACCCAGCAGTGAGTCCAGC---GAAGAGGCTGGTGAGCCAT

*Sicista tianshanica*

CTCTTACCATCTTCGGCAACGCGCTGGTCATTCTGGCTGTGTTGACCAGCCGCTCGCTACGCGCG  
CCACAAAACCTGTTTCTGGTGTGCTGGCTGCTGCGGACATCCTGGTGGCCACGCTTATCATTC  
TTTTTCTCTGGCCAACGAGCTGCTGGGCTACTGGTATTTCCGGCGCACTTGGTGGGAGGTCTACC  
TGGCGCTCGACGTGCTCTTCTGCACCTCGTCGATTGTGCACCTGTGCGCCATCAGTCTGGACCGG  
TACTGGGACGTGAGCCGCGCGCTGGAGTACAACCTCCAAGCGCACCCCGCGCCGCATCAAGTGCAT  
CATCCTCACGGTGTGGCTCATCGCAGCCGTCATCTCGCTGCCGCCCTCATCTACAAGGGCGAGCA  
GGGCCCCCAAACCCACGAGCGCCCCCAGTGCAAGCTCAACCAAGAGGCCTGGTACATCTTGGCCT  
CCAGCATCGGGTCTTTCTTTGCACCCTGCCTCATCATG-ATCCTCGT-----  
TTCATGGACATGGAGTGCTTCATGATCCTGAACCCAGCCAGCAGCTGGCCATCGCTGTGCTGTC  
CCTCACCCCTGGGCACCTTACGGTTCTCGAGAACCTGCTGGTGTGTGTGTCATTCTGCACTCCCG  
CAGCCTGCGCTGCAGGCCTTCTACCATTTCATTGGCAGCCTGGCAGTGGCTGACCTCCTGGGAA  
GCGTCATTTTCGTCTATAGCTTCGTGGACTTCCATGTGTTCCACCGTAAGGATAGCCCCAATGTG  
TTTCTGTTCAAACCTGGGCGGGGTACGGCCTCCTTACCAGCCTCCGTAGGCAGCCTGTTCTCACA  
GCCATCGACAGGTACATATCTATCCACAGGCCCTGGCCTATAAGAGGATCGTCACCAGGCCCAA  
GGCGGTGGTGGCCTTTTGCCTGATGTGGACCATCGCGATTGTCATTGCTGTGCTGCCCTCCTCG  
GCTGGAAGTGCACCTGATGAAAAGATTGAAGGATCGGATACAGACAGACTTCTAAGCTGTGGCC  
A---  
TCCGAAATCACTTAATATCCTTGGGGCCAAAGAAGATGATTCTGGACGTACCAGCTGTTATGACC  
CTGACCTTCTGGAAACGGATTTCCCAGACAGTGACATGTGTGATGGTGCCTCAGAGGTTGCTCAG  
CCACAGAGGTTAAAAGGGGAAGCTGATCTCTTGTGCCTTGACCAGAAAAATCAAAACAACTCAC  
CTTA---TGATGCTTCTCCTG---CCACTCAGCTGCCAGCGTTACCCTGAC---  
GGAAGAAAACAAACCACAACCACTTCTCATTAGTGAAACTGAGTCAACCCACCAACTTGCCTCTA  
TGCTGATCAGCAATCCTAGTTCACTGGCCAACATGACTTTTATGCCCAAGTAAGCGACATCACA  
CCAGCAGGGAGTGTAGTCCTTTCCCAGGCCAAAAGAATAAGGCAGGGCTAGCCCAGTGCCACGT  
CATGC---  
ATCCAGAAGTGGTCTCAGCCTGCCAAGCCAATTACAACATGGATAATACCTACTTCTGCGAAGCA  
GATGCCAAAAGTGCATC-GCTGTAGCCCCTCACATGGAAGTCAAATCACATGGAGAG---  
CCTTGCTTTAACCTATGAACCCAGCAG---

CCTCGAGGCTTCCCAGCAAGCCTCAGTGCTCACCAACCTCACTCGAGAGGAACTGCTGGTCCAGC  
TGCAGAAGAACATCCACCATGAGGTCTGGAGGGCAATGTGGGTTATCTACGCGTGGATGACCTC  
CCGGGGCAGGAGGTAAGTGAAGTACTGAGTGAAGTACTGAGGGTTCTGGTGGACCACGTGTGGAAGCAGCTCA  
TGGGCACTTTCGCTTGGTGTGGATCTCCGGCACTGCACTGGAGGCCACGTCTCTGGTATCCCC  
TATGTCATCTCCTACTTGCACCCTGGAAATAGCGTCGTGCACGTGGACACCATCTACAATCGCCC  
CTCCAATACCACCACGGAGATCTGGACCTTGCCCAAGGTCTGGGAGAGCGGTACAGTGCCGACA  
AGGATGTGGTAGTCTCACCAGTGGTGCACAGGAGGTGTGGCTGAGGAYATCACCTACATCCTC  
AAACAGATGCGCAGGGCCATTGTGGTGGGTGAGCGGACTGAGGGGGGTGCTCTAGACCTCCAGA  
A-----

ACGACTTCCCCCTGGATGTTTCCCTCCCGCCAGGTGTGGCCTGAGGACCATGTGTTTCAATTTCCAC  
ACCAAGCTTCAACTACACAGGCCATGACTTTCAGCGCTTCTTTACGGACCTTCACTTTGAGGAAG  
GATGGTACATGTGGCTGCAGTCACGTGACCTGCTGGCAGGACTCCCAGCACCTGGTGTGGAAGTA  
TACTGTCTGTATGGCGTGGGTCTGCCACACCTCGCACCTACATCTATGACCACAGTTTCCCCTAC  
AAGGACCCTGTGGCTGCACTCTATGAGGACGGTGTGACACAGTGGCCACACGCAG?ATTGAGCT  
CTGTGGCCAGTGGCAGGGCCGCCA-----

TTAGAAAGGAGCCAACCGAGCAGAAGGGCTGAAAGTAAGGAAACATGTAATGAGAGACAGATTC  
CCAGCAATGAGAAGAAGGCGGAACTGAGTGCTGGTGCCTCTGTGGGAGACAAGAATCGAATGA  
ACAGAAACCCCATGCTCTGAGACTCCTAGAGATAATGAAGAGCTTGCTTGGGTACCCCTCAACA  
GTAGCATTCTGAAAGTGAAGGAGTGGTTTTCCAGAAGTGGTGAATGTTAACTTTTGATGGTGA  
AGACRACACGAGGTGTGAGTCAAATGCTGAAGTAGCTGGTGCCGTAGACGTTTCAAATGATGTA  
AATGGATATCC---TTCTTCCAAGAAAACAGA---

CTTGGTCACTGATCCTCATCATGCTTTAATATGTCAAAGTGAAGAGTCTGCTCCAAACC---  
AGAGACTAATATCAAAGATAAAATATTTGGGAAAACCTATC---  
AGAAGAAGGCAGGCCCTCCCTAATTTGAGCCATGTAAGTGAAGTCTAATTATAGGAGCATTTCG  
CAAAGAACCACAAAAAGCCCAAGAGCAACCAT-----GGTG-----

CACAGATGTCCCGATCAGTCCCACCACCCATATGTGGAAGACACACCTGAGCCACCGCTGCACG  
ACTTCTACTGCAGCAAGCTGCTAGATCTGGTCTTCCCTGCTGGATGGCTCTTCCAAGCTGTCTGAG  
GCAGAGTTTGAGGTGCTCAAGGCCTTTGTGGTGAAGTATGATGGAGCGGTTGCACATTTCTCAGA  
AGCGCATCCGTGTGGCGGTGGTAGAGTACCACGACGGCTCCCATGCCTACATCGAGCTCAAGGCC  
CGGAAGCGGCCCTCAGAGCTGCGACACATCACCAGCCAGGTGAAGTATGCCGGCAGCCAGGTGGC  
CTCCACTAGTGAAGTCTTGAAGTACACACTGTTTCAAATCTTTGGCAAAGTCGACCGCCCGGAGG  
CCTCCCGTGTACACTGCTCCTGACCGCCAGCCAGGAGCCTCCACGAATGGCCCGGAACTTA-----  
--GTCCGCTACGTC-----

CAGGGCTTGGCTGTGGGCTTCCCAGCATTTATCAAAAAACAGCCCAAGTACCTCAAATTGGGAGC  
AATTGATGTGGAGCGTCTAAAGAACACAGCAGTCAAATCTCCAGAAGGATCACTGAAAAGGAGT  
CCTTACATAACCAATGATTTAACAGCCACTTTCATTGTAGATGGCATGCATTGTAAATCGTGTGT  
GTCAAACATTGAGAGTGCTTTATCTACACTCCAGTATGTAAGCAGCATAGTAGTTTCTTTAGAG  
AATAGGTCTGCCATTGTAAAGTACAATGCGAGCTCTGCCACTCCAGAAAACGCTAAGAAAAGCAA  
TAGAGGCTGTTTACCAGGGCAATATAAAGTTAGTATTGCAAGTGTGTTGAAAGTCCCTCCA---

CTTCATCTCTTCCAGAAGGTTCCCTTTGAACATAGTTAGCCAGCCACTGACTCAAGAACTGTGATA  
AATATTAGTGGAATGACTTGTAATTCTTGTGTACAGTCTATAGAGGGTATGATATCCAAAAATC  
CAGGTGTAAAATCTATA---

CGAGTCTCCCTGGCAAATAGCACTGGGACTGTTGAGTATGATCCTCTCCT-----  
-----GCAGAGTACTGTCTTTGGCTCAGACCCTGTTGACT-

TGAACTCTAATCAAGGC-----  
ATTTGTAGAAGGGACACTCGTGACCCTTACTTAAGAATCCAGTTGGGCTTAGCGTG-----  
TGAATTGGGAATACTGTTCCAAGACTTGGAAACACAACCTTAATCACT-  
TTAGCAGGCTTACTATTCATTTCTTTGTCAATAGCATG-AA-A-----  
CGTGTTTTTGTCTGCCCTCTTACCCCTACTTTTCCCAGGGAAGCTGCTAAAGAATGTCGACGTAG  
GAAAAAAGAGTACGTCAAGTGTCTGGAGAGTCGCGTCGCAGTGCTGGAAGTTCAGAAC-  
AGAAGCTGATAGAGGAACTGGAAACC-----  
ATTTATATCATGTCTATTGCTTGCAAAAACAACAAAAAAGTCACTTTCCACTGTACAGAGAAAG  
ACTTGGGAGGAGATGTTCCAGAAGCTAGATATGGTCATTCCATTGATGTGGTGTACAGTCCGAGG  
GAAGAGCATGGGGGTTCTCTTTGGAGGACGGTCTACATGCCCTTCTACCCAAAGAACCACAGAAA  
AATGGAATAAGGTGGCTGACTGCCTGCCCATGTTTTCTGGTGGATTTTGAATTTGGGTGTGCT  
ACGTCATACCTTCTTCCAGAACTTCAGGATGGGTATCATTTTCATGTCTCTATTGCCAGAAATGA  
CACCATTTATATTTTAGGAGGACACTCGCTTGCTGATAATACCCGCCCTGCAATCTGTACAGAA  
TAAGGGTAGATCTTCCCCTGGGTAGCCAGCTGTGAGTTGCACAATCTTAGAGGAGTTTTGGATG  
GGAGGTGGCAGTGAGGGAGAGAGTAGCCACGGGG---ACGGGTCTGAGTTTGATGAT---  
GAAGGGATGATGAGTGATGACCCAGACAGCACCAGGA---  
GTGAGCGAAGCCACTCCAGGATGAGCAGTGCTGGTGTGAGGTCAAAGAATCTGAATGGGACAA  
GGAGCCGGCCAGAGCTCAGGATTCAGATGGCAGCCAATCTGTGGAGAATCCAGGCAGGAAGATC  
TTCAGAAGGCCCCACATTTCTGAGGAAGATGACAGAGGTGACCTTGTTGATAGTCACACTAT---  
GGAAGTCCAGAGTACTCCACAGAAAACCTCCAAGTCTCAGGAAGCTGGCGTCAGCCAATCCAGGG  
AGGACAGTGAGAGTGATTCTCAGGAGGACAGCACGGAGAGCCAGTCCCAGGAAGATA-----  
ATGGACAAGACTCCAGCAGTGAGTCCAGC---GAAGAAGTTGACCAGCCAT

Zapus\_hudsonius

CTCTTACCATTTTCGGCAACGCGCTGGTCACTTCTGGCCGTGCTGACCAGCCGCTCGCTCCGCGCA  
CCCCAGAACCTGTTTCTGGTGTGCTGGCTGCGGCGGACATCCTGGTGGCCACGCTTATCATTCC  
TTTTTCTCTGGCCAACGAGCTGCTGGGCTACTGGTACTTCCGGCGCGCTTGGTGGGAGGTCTACC  
TGGCGCTGGACGTGCTCTTCTGCACCTCGTCCATTGTGCACCTGTGCGCCATCAGTCTGGACCGG  
TACTGGGCAGTGAGCCACGCGCTCGAGTACAACCTCCAAGCGCACCCCGCGCCGCATCAAATGCAT  
CATCCTCACCGTGTGGCTCATCGCAGCCATCATCTCGTGGCGCCCTCATCTACAAGGGCGATCA  
GGGCCCCCAAACCCACGAGCGCCCCCAATGCAAGCTCAACCAAGAGGCCTGGTACATCCTGGCCT  
CCAGTATCGGGTCTTTCTTTGCACCCTGCGTCATCATG-ATCCTCGT-----  
TTCATGGACATGGAGTGTTCATGATCCTGAACCCAGCCAGCAGCTGGCCATCGCTGTGCTGTC  
CCTCACGCTGGGCACCTTCACTGTCTCGAGAACCTGCTAGTGCTGTGTGCATCCTGCATTTCCC  
CAGCCTCCGCTGCCGGCCTTCCCTACCACTTCACTGGCAGCCTGGCGGTGGCTGACCTCCTGGGCAG  
CGTCATTTTTGTCTACAGCTTCGTCAATTTCCACGTGTTCCACCGGAAAGATAGCCCCAATGTGT  
TTCTGTTAAACTGGGTGGGGTCACGGCCTCCTTACCAGCCTCCGTAGGCAGCCTGTTCTCAGG  
GCCATCGACAGGTACATATCTATTCACAGGCCCTGGCCTATAAGAAGATTGTCACCAAACCCAA  
GGCCGTGGTGGCATTTTGCCTGATGTGGACCATCGCCATTGTCATTGCTGTTCTGCCTCTTCTCG  
GTTGGAAGTGCACCTGATGAAAAGACTGAAGGATCAGACACTGACAGACTTCTAAACGATGACC  
A---  
TCAGAGATCACTTCATATCCTTGGGGCCAAGGACGATGATTCTGGGCGCACCAGCTGTTATGACC  
CTGACATTCTGGAAACTGATTTCCCAGCCAGTGACATGAGTGATGGTGTCTCAGGGATTGCTCAG  
CCACAGAGGTTAAAAGGGGAAGCTGATCTTGTGCCTTGACCAGAAAAATCAAATAACTCAC  
CTTA---CAATGTTTCCCCTGCTACTACTCAGCAGTCCAGCATTACCCTAAC---  
AGAGGAAGACAAACCACGACCACTTGTTATTAGTGAAACAGAATCAGCCCACCAACTTGCCTCCA  
CGCAGATCAGCAACCCTAGTGCACTGGCCAACATTGACTTTTATGCCCAAGTAAGTGACATTACA

CCAGCAGGGAGTGTAGTCCTTTCCCCGGGTCAAAGAATAAGGCAGGGATGCCCCCATGTGACAT  
CATGC---

ATCCAGAAGTGATCTCAGCTGGCCCAGCCAATGACAACACGGACAACGCCTACTTCTGTGAGGCA  
GATGCCAAGAAGTGCATC-GCTGTGGCGCCTCACATGGAAGTCAAATCACACGTAGAG---

CCCAGCTTTAACCTATGAGCCTAGCAC---

CCTCGACACTTCCCAACAAGCCTCGGCATTCACAAACCTCACCCACAAGGAGCTGTTG-----

CAGCAGAACATCCAGCATGAGGTACTGGAGGGCGATGTGGGCTACCTACGACTGGATGACATCCC  
GGGCCAGGAGGAGCTGAGTGAGCTGGGGACTTCTGGTGGATCAGGTGTGGAAGCAGCTCCTA  
GGCACCTCCGCTTTGGTGCTTGATCTCCGCCACTGCACTGGAGGCCGTGTCTCGGGAATCCCCTAC  
GTCATCTCCTATTTGCACCCCGGAATACTGTAGTGCATGTGGACACCATCTATGATCGCCCCTT  
CAACACCACCACGGAGATCTGGACCTTGCCCAAGGTCCTGGGAGAGAGGTACAGTGCTGACAAAG  
ATGTGGTGGTCTCACCAGTGGTCGCACAGGAGGTGTGGCTGAGGACATCGCGTACATCCTTAAG  
CAGATGCGCAGGGCCATTATAGTGGGTGAGCGGACTGAGGGGGGCGCCCTGGATCTCCAGAA----

-----  
ACGACGTCCCCTTGGATGTTTCCCTCCCGCCAGGTGTGGCCTGAGGACCATGTATTCATTTCCAC  
GCCAAGCTTCAACTACACAGGCCATGACTTTCAGCGCTTCTTTACGGACCTTCACTTTGAGGAAG  
GCTGGTACATGTGGCTACAGTCACGTGACCTGCTGGCAGGCCTCCAGCACCTGGAGTGGAAGTG  
TACTGCCTGTATGGGGTGGGTCTTCCCACACCCCGCACCTACATCTATGACCACAGCTTCCCTTAC  
AAGGACCCTGTGGCCGCGCTCTACGAGGACGGTGATGACACAGTAGCTACGCGCAGCACTGAGCT  
GTGTGGCCAGTGGCAGGGTCGCCA-----

-----  
TTAGAAAGGAGCCAACCAACAGATGGGCCAAAAGTGAGGAAACATGTGATGATAGGCAGATTC  
CCAGCCCCGAGAGAAGGGTGGGTCTGAGTGCTGGTCCCCTCTCTGGGAGACAAGAACTGAATGAG  
CAGAAACCTCCGTGTTCTGAGACTCCTGGGCATAATGACAGTCTTGCTTGGATAGCCCAAGACAG  
CAGCATTCTGAAAGTGAACGAGTGGCTTTCAGAAAGTGATGGTATGTAACTGCTGATGATACT  
GACAACATGAGGTGCAAGTCAAATGCTGAAGTAGCTGGGAC---

AGAAGTTTCAGATGAAGCAAATGGATATTTCTTGTCTTCCAAGAAAACAAGCCTCCTGGACACT  
GATTCTCATCCTGCTTTAATATGTCCAAGTGATAGAGTCTGCTCCAAACC---

AGAGAGCAATATTAAGATAAGATATTTGGAAAAACCTATG---

AGAAGAAGACAAGCCTCCCTAACTTGAACCATGCAACTAAGAGTCTCCTTACAGGAGCATTGCT  
GCCAAACCACAAATACCAGGAGAGCATCCCT-----GGTC-----

CACAGATGCCCAATCAGCCCCACCACCCCGTATGTGGAAGACACACCTGAGCCGCCCTGCACGA  
CTTCTACTGCAGCAAGCTGCTAGATCTGGTCTTCTGCTGGATGGCTCCTCCAGGCTGTCTGAGG  
CTGAGTTTGAAGTGTCAAGGCCTTCGTGGTGAACATGATGGAGAGGCTGCACATCTCTCAGAAG  
CGCATCCGAGTGGCGGTGGTGGAGTACCATGATGGCTCCCACGCCTACATCGAGCTCAAGGCCCG  
GAAGCGGCCCTCCGAGCTGCGGCGCATCGCCAGCCAGGTGAAGTATGCGGGCAGCCAGGTGGCCT  
CCACCAGCGAGGTCTTGAAGTACACGCTGTTTCAGATCTTCGGCAAAGTCGACCGCCCCGAAGCC  
TCCCGTATTATCCTGCTCCTGACTGCCAGCCAGGAGCCCCACGGATGTCCCGCAACCTG-----  
GTCCGCTACGTC-----

CAGGGCTTGGCTGTGGGCTTCCCAGCATTTATCAAAAAACAGCCCAAGTACCTCAAATTGGGAGC  
TATTGATGTGGAGCGTCTAAAGAACACACCTGTCAGATCTCCAGATGGATCACTGAAAAGGAGC  
CCCTCATCTACCACTGATTTAACGGCCACTTCTTTCGTTGATGGCATGCACTGTAACCTCATGTGT  
ATCAAACATCGAGAGTGCTTTATCTACACTCCAGTATGTAAGCAGCATAGTTGTTTCTTTAGAGA  
ATAGGTCTGCCATTGTAAAGTATAATGCCAGTCTGCCACTCCAGAAACACTGAGGAAAGCAAT  
AGAGGCTGTTTACCAGGGCAATATAAAGCTCAGATTGCAAGTGACGCTGAAAGTACCTCCAAC  
T-----



CTCATCTCTTCAGAGGTTTCCCTTGAACATAGTTAGCCAGCCTCTGACTCAAGAAACCGTGATAA  
ACATTAGTGGGATGACTTGTAAATTCTTGTGTACAGTCTATAGAAGGTGTGATATCAAAAAGCC  
AGGTGTAAAATCCATA---  
CGAGTCTCCCTGGCAAACAGCACGGGGACTGTTGAGTATGATCCACTGCT-----  
-----  
GAAGAGTAACTGTCCTTGGCCTGGGCCTTGTGACTGTAAACTCTAGTCAAGGC-----  
-----TCTTGTAGAAGGGACCTTGTGGCCCTTACTT-AGAACCCAGCTTGGCTTAGTGCA--  
---TGAATTGGGAATATTGTTCCAAGATTTGGAATGCAACTTTAATCACA-TTAGCAGGTTTACT-  
TTAAATTTTCTATCAAGAGCATGCAA-A-----  
CAAGTTTTTGTCTGCCCTCTTGCTTCTACTTTTCCCAGGGAAGTGGCAAAGAATGTTGACGTAG  
GAAAATTGAATATGTCAAATGTCTAAAGAGTCAAGGCACAGTATTGGAAGTTCAGAAC-  
AAGAATCTTATAAAGGAACTGGAAACC-----  
GTTTATATCATGTATATTGTTTGAAGAATAACAAAAAAGTTACTTTCCACTGTACTGAGAAAG  
ACTTGGTAGGAGATGTTCCAGAAGGTAGATATGGTCACTCCATTGATGTGGTGTACAGTCGAGG  
GAAAAGTATGGGTGTTCTGTTTGGAGGACGGTCTACATACCTTCTACCCAAAGAACCACAGAA  
ACATGGAACAGGGTAGCTGACTGCCTGCCCCACATTTTCCCTGGTGGATTTTGAATTTGGGTGTGC  
TACATCATAACCTTCCAGAACTTCAGGATGGGCTCTTTTTTCATGTCTCTATTGCCAGAAATG  
ATACCATTTACATTTTAGGAGGACACTCGCTTGCCAGTAATACCCGCCCTGCCAATCTGTACAGA  
ATAAGGGTCGATCTTCCCCTGGGTAGCCAGCTGTGAGTTGTACAATCTT-----  
-----AGCCACGGGGGACG?GAGTCTGAGCTTGATGAT---  
GAAGGAATGCTGAGCGATGACCCAGACTGCACCAAGGAG?GTGACAGGAGCCACTTCAGGATGAG  
TAGTGCTGGGGTCAGGTCCAAAGAATCTCAAGGGGACAATGAASCAGYCAGCCCTCGGGACTCAG  
ACCATATCCCATCTGTGGAGTACCCAAGCAGGAGGTTCCCTCAGAAAGGCCCGCATTTCTGAAGAA  
GATGGCAGAGATGACCTTGTGACAGCAAACTAT---  
GGAAATCCAGAGTGACTCCACAGAAAAGTTCAAGTCCAAGGAG-----  
TCCGGGGAGGAAAGTGACAGCGATTCCCAGGAGGACAGCCAGAGAGCCAGTCCCAGGAAGACA  
GTTCAAATGGACGAAACTCCAGCAGCGAGTCCAGC---GAAGAAGCTGACCAGCCAT

*Napaeozapus insignis*

CTCTTACCATTTTCGGCAACGCGCTGGTCATTCTGGCCGTGCTGACCAGCCGCTCGCTCCGCGCA  
CCACAGAACCTGTTTCTGGTGTGCTGGCCGCGGCGGACATCCTGGTGGCCACGCTTATCATTTCC  
TTTTTCTCTGGCCAACGAGCTGCTGGGCTACTGGTACTTCCGGCGCACTTGGTGGCAGGTCTACC  
TGGCGCTGGACGTGCTCTTCTGCACCTCGTCCATCGTGCACCTGTGCGCCATCAGTCTGGACCGGT  
ACTGGGCAGTGAGCCGCGCGCTCGAGTACAACCTCCAAGCGCACCCCGCGCCGATCAAATGCATC  
ATCCTCACCGTGTGGCTCATCGCAGCCATCATCTCGCTGCCGCCCTCATCTACAAGGGCGACCAG  
GGCCCCCAAACCCACGAGCGCCCCCAATGCAARCTCAACCAAGAGGCCTGGTACATCCTGGCCTCC  
AGTATCGGGTCTTTCTTTGCACCTGCGTCATCATG-ATCCTCGT-----  
TTCATGGACATGGAGTGTTCATGATCCTGAACCCAGCCAGCAGCTGGCCATCGCTGTGCTGTC  
CCTCACGCTGGGCACCTTACGGTCTCGAGAACCTGCTAGTGCTGTGTGTCATCCTGCATTCCCG  
CAGCCTCCGCTGCCGGCCTTCCCTACCACTTCAATTGGCAGCCTGGCGGTGGCTGACCTCCTGGGCAG  
CGTCATTTTTGTCTACAGCTTCGTCGACTTCCACGTGTTCCACCGGAAAGATAGCCCCAATGTGT  
TTCTGTTTAAACTGGGTGGGGTCACGGCCTCCTTCACTGCCTCCGTAGGCAGCCTGTTCCCTCAG  
GCCATCGACAGGTACATATCTATTACAGGCCCTGGCCTATAAGAGGATTGTCACCAGACCCAA  
GGCCGTGGTGGCGTTTTGCCTGATGTGGACCATCGCCATTGTCATTGCTGTTCTGCCTCTTCTCG  
GTTGGAAGTGCACCTGATGAAAAGACTGAAGGATCAGACACTGACAGACTTCTAAATGATGACC  
A---  
TCAGAGATCACTTCATATCCTTGGGGCCAAGGACGATGATTCTGGGCGCACCAGCTGTTATGACC

CTGACATTCTGGAAACTGATTTCCCAGCCAGTGACATGAGTGATGGTGTCTCAGGGATTGCTCAG  
CCACAGAGGTTAAAAGGGGAAGCTGATCTCTTGTGCCTTGACCAGAAAAATCAAATAACTCAC  
CTTA---CAATGTTTCCCCTT---CTACTCAGCAGTCCAGCATTACCCTAAC---  
AGAGGAAGACAAACCACGACCACTTGTATTAGTGAAACAGAATCAGCCCACCAACTTGCCTCCA  
CGCAGATCAGCAACCCTAGTGCCTGGCCAAACATTGACTTTTATGCCCAAGTAAGTGACATTACA  
CCAGCAGGGAGTGTAGTCCTTTCCCCGGGTCAAAGAATAAGGCAGGGATGCCCCCATGTGACAT  
CATGC---  
ATCCAGAAGTGATCTCAGCTGGCCCAGCCAATGACAACACGGACAACGCCTACTTCTGTGAGGCA  
GATGCCAAAAAGTGCATC-GCTGTGGCCCCTCACATGGAAGTCAAATCACACGTAGAG---  
CCCAGCTTTAACCTATGAGCCTAGCAC---  
CCTCGGCACTTCCCAGCAAGCCTCAGCATTCAAAACCTCACCCACAAGGAGCTGTTG-----  
CAGCAGAACATCCACCATGAGGTAAGTGGAGGGCGATGTGGGCTACCTACGACTGGATGACATCCT  
GGGCCAGGAGGAGCTGAGTGAGCTGGGGGACTTCTTGGTGGATCAGGTATGGAAGCAGCTCCTA  
GGCACCTCCGCTTTGGTGTCTGATCTCCGCCACTGCACTGGAGGCCGTGTCTCGGGAATCCCCTAC  
GTCATCTCTATTTGCACCCCGGAATACTGTTCTGCATGTGGACACCATCTATGATCGCCCCTC  
CAACACCACCACGGAGATCTGGACCTTGCCCAAGGTCTTGGGAGAGAGGTACAGTGCTGACAAAG  
ATGTGGTGGTCTCACCAGTGGTGCACAGGAGGTGTGGCTGAGGACATTGCGTACATCCTTAAG  
CAGATGCGCAGGGCCATTATAGTGGGTGAGCGGACTGAGGGGGGTGCCCTGGATCTCCAGAA----  
-----  
ACGACGTCCCCTTGGATGTTTCCCTCCCAGGTGTGGCCTGAGGACCATGTATTCATTTCCAC  
GCCAAGCTTCAACTACACAGGCCATGACTTTCAGCGCTTCTTTACGGACCTTCACTTTGAGGAAG  
GCTGGTACATGTGGCTACAGTCACGTGACCTGCTGGCAGGCCTCCCAGCACCTGGTGTGGAAGTG  
TACTGCCTGTATGGGGTGGGTCTGCCACACCCCGCACCTACATCTATGACCACAGCTTCCCTTAC  
AAGGACCCTGTGGCCGCGTCTACGAGGACGGTATGACACAGTAGCCACGCGCAGCACTGAGCT  
GTGTGGCCAGTGGCAGGGTCCCA-----  
-----  
TCAGCAAGGAGCCAACCAAACAGATGGGCCAAAAGTGAGGAAACATGTGATGATAGGCAGATTC  
CTAGTCCCGAGAGAAGGGTGGGTCTGAGTGCTGGTCCCCTCTCTGGGACACAAGAACTGAATGAA  
CAGAAACCTCCATGTTCTGAGACTCCTGGGCATAATGACAGTCTTGCTTGGATAGCCCAAGACAG  
CAGCATTCTGAAAGTGAACGAGTGGCTTTCCAGAAGTGATGATATGTTAACTGCTGCTGATACT  
GACAACATGAGGTGCAAGTCAAATGCCGAAGTAGCTGGGAC---  
AGAAGTTTCAGATGAAGCAAATGGATATTCTTGTCTTCCAAGAAAACAAGCCTCCTGGACACT  
GATCCTCATCCTGCTTTAATATGTCCAAGTAAAAGAGTCTGCTCCAAACC---  
AGAGAGTAATATTAAGATAAGATATTTGGAAAAACCTATG---  
AAAAGAAGACAAGCCTCCCTAACTTGAACCATGCAACTAAGAATCTCCTTACAGGAGCATTGCT  
GCCGAGCCACAAATACCAGGAGAGCATCCCT-----GGTG-----  
CACAGATGCCCCACTCAGCCCCACCACCCCGTATGTGGAAGACACACCTGAGCCGCCCTGCACGA  
CTTCTACTGCAGCAAGCTGCTAGATCTGGTCTTCTGCTGGATGGCTCCTCCAGGCTGTCTGAGG  
CTGAGTTTGAAGTGTCAAGGCCTTCGTGGTGGAGTACCATGATGGCTCCACGCCTACATTGAGCTCAAGGCC  
GGCAGCGGCCCTCCGAGCTGCGGCGCATCGCCAGCCAGGTGAAGTATGCGGGCAGCCAGGTGGCC  
TCCACCAGCGAGGTCTTGAAGTACACGCTGTTTCCAGATCTTTGGCAAAGTTGACCGCCCCGAAGC  
CTCCCGTATTATCCTGCTCCTGACTGCCAGCCAGGAGCCCCGAGGATGGTCCGGAACCTG-----  
-GTCCGCTATGTC-----  
CAGGGCTTGGCTGTGGGCTTCCCAGCGTTTATAAAAAACAGCCCAAGTACCTCAAGTTGGGAGC  
TATTGATGTGGAGCGTCTAAGAACACACCCGTCAGATCTCCAGATGGATCACTGAAAAGGAGC

CCCTCATCTACCACTGATTTAACGGCCACTTTCTTCGTTGATGGCATGCACTGTAACCTCGTGTGT  
ATCAAACATTGAGAGTGCTTTATCTACACTCCAGTATGTAAGCAGCATAGTCATTTCTTTAGAG  
AATAGGTCTGCCATTGTAAAGTACAATGCCAGTTCTGCCACTCCAGAAACTGAGGAAAGCAA  
TAGAGGCTGTTTCACCAGGGCAATATAAAGCTCAGATTGCAAGTGACGCTGAAAGTACCTCCAAC  
TCTC---

CCTCCTCCTCATCTCTTCAGAGGTTTCCCTTGAACATAGTTAGCCAGCCTCTGACTCAAGAAACC  
GTGATAAACATTAGTGGGATGACTTGTAATTCTTGTGTACAGTCTATAGAGGGTGTGATATCAA  
AAAAGCCAGGTGTAAAATCCATA---

CGAGTCTCCCTGGTAAACAGCACAGGGACTGTTGAGTATGATCCACTG-----

-----  
CTGTCCTGGGCCTGGGCCTTGTGACTGTAAACTCTAATCAAGGC-----

TTCTTGTAGAAGGGACCCTTGTGGCCCTTACTT-AGAATCCAGCTTGGCTTAGTGCA-----

TGAATTGGGAATATTGTTCCAAGATTTGGAATGCAACTTTAATCACA-TTAGCAGGTTTACT-

TTAAATTTTCTATCAATAGCATGCAA-A-----

CAAGTTTTTGTCTGCCCTCTTGCTTCTACTTTTCCCAGGGAAGTGGCAAAGAATGTTGACGTAG

GAAAAATGAATATGTCAAATGTCTCAAGAGTCGAGGCGCAGTGTGGAAGTTCAGAAC-AAG----

-----  
GTTTATATCATGTCTATTGTTTGAAGAATAACAAAAAGCTACTTTCCACTGTACTGAGAAAG

ACTTGGTAGGAGATGTTCCAGAAGGTAGATATGGTCACTCCATTGATGTGGTGTATAGTCGAGG

GAAAAGTATGGGTGTTCTGTTTGGAGGACGGTCTACATACCTTCTACCCAAAGAACCACAGAA

ACGTGGAACAGGGTAGCTGACTGCCTGCCCCACATTTTCTGTTGGATTTTGAATTTGGCTGTGC

TACATCATACATCCTTCCAGAACTTCAGGACGGGCTCTCTTTTCATGTTTCTATTGCCAGAAATG

ATACCATTTACATTTTAGGAGGACACTCACTTGCCAGTAATACCCGCCCTGCCAATCTGTACAGA

ATAAGGGTCGATCTTCCCCTGGGTAGCCCAGCGGTGAGTTGTACAATCTTAGAGGAGCATTGGGT

GGGAGGTGTCAGTGAGGGGGACAGCAGCCACGGGG---ACGGGTCTGAGCTAGACGAT---

GAAGGAATGCTGAGCGATGACCCAGACAGCGCCAGGA---

GTGAGAGGACCCACTTCAGGATGAGTAGTGCTGGGGTCAGGTCCAAAGAATCTCAAGGGGACAA

GGAAGCAGCCAGCACCAGGGACTCAGACCATGGCCATCTGTGGAGTATCCAGGCAGGAGGTTCT

TCAGAAAGGCCGCATTTCTGAAGAAGATGACAGAGGTGACCTTGCTGACAGCAACTAT---

GGAAATCCAGAGTGACTCCACAGAAAAGTTCAAGTCCAAGGAGGCTGGCCTCAGCCAGTCCGGGG

AGGAAAGTGACAGCGATTCCAGGAGGACAGCCCCGAGAGCCAGTCCAGGAAGACAGTTCAA

TGGACAAGACTCCAGCAGTGAGTCCAGC---GAAGAAGCTGACCAGCCAT

#### Allactaga\_sibirica

CTCTTACCATTTCGGCAACGCGCTGGTCATTCTGGCTGTGATGACCAGCCGCTCTCTACGCGC

ACCACAGAACCTGTTTCTGGTGTGCTGGCTGCTGCAGACATCCTGGTGGCCACGCTTATCATTC

CTTTTTCTCTAGCCAACGAGCTGCTGGGCTACTGGTACTTCCGGCGCACTTGGTGCAGGCTTAC

CTGGCGCTCGACGTGCTCTTCTGCACCTCGTCCATCGTGCACCTGTGTGCCATCAGTCTGGACCGG

TACTGGGCAGTGAGCCGCGCGCTAGAGTAACTCCAAGCGCACCCCGCGCCGCATCAAATGCAT

CATCCTCACCGTGTGGCTCATCGCAGCCATCATCTCGCTGCCGCCCTCATCTACAAGGGCGATCA

GGGCCCCAAACCCACGAGCGCCCCAATGCAAGCTCAACCAAGAGGCCTGGTACATCTTGGCCT

CCAGCATCGGGTCTTTTTTGCACCCTGCCTCATCATG-ATCCTCGT-----

TTCAAGGACATGGAGTGCTTCATGATTCTGAACCCAGCCAGCAGCTGGCCATCGCTGTGCTGTC

CCTCACACTGGGCACCTTACAGTCCTGGAGAACCTGCTGGTGTGTGTGTCATCCTGCACTCAC

GCAGCCTCCGCTGCCGGCCTTCTACCCTTCAATTGGCAGCCTGGCAGTGGCTGACCTCCTGGGCA

GCGTCATTTTTGTCTACAGCTTTGTGCGACTTCCATGTGTTCCACCGTAAAGATAGCCCCAATGTG

TTTCTGTTCAAGCTGGGCGGGGTCACGGCCTCCTTACAGCCTCCGTAGGCAGCCTGTTCTCAGC

GCCATCGACAGGTACATATCTATTCACAGGCCCTGGCCTATAAGAGGATCGTCACCAGGCCCAA  
GGCCGTGGTGGCCTTTTGTCTGATGTGGACCATCGCAATTGTCATTGCTGTGCTGCCCTCCTCG  
GATGGAAGTGCACCTGATGAAAAGACTGAAGGATCAGACACGGACAGACTTCTAAACAATGACC  
A---

TCAGAGATCGCTTAACATCCTTGGGGCCAAGGATGATGATTCTGGGCGTACCAGCTGTTATGACC  
CTGACATTCTGGAAACTGATTTCCCATCCAGTGACATGTGTGATGGTGCCTCAGGGTTCGCTCAG  
CCACAGAGGTTAAAAGGGGAAGCTGATCTTGTGCCTTGATCAGAAAAATCAAATAACCTAC  
CTTA---TGATGCTTCTCCTG---CCACTCAGCAGCCCAGCATTACCCTMAC---

AGAGGAAGACAAACCACGGCCACTTCTTRCTAGTAAAACAGAGCCAACCCACCAACTTGCTTCCA  
TGCAAATCAGCAATCCTAGTTCCCTGGCCAAACATTGACTTTTATGCCCAAGTAAGTGACATTACA  
CCAGCAGGGAGTGTAGTCCTTTCTCCAGGCCAAAAGAATAAGGCAGGGATACCCCATGCGACAT  
CATGC---

ATCCAGAAGTGATCTCAGTCTGCCAAGACAATTACAACATGGACAATGCCTACTTCTGTGAGGCA  
GATGCCAAAAAGTGCATT-GCTGTGGCCCTCACATGGAAGTCAAATCACATGTAGAA---  
CCCAGCTTTAACCTATGAGCCCAGCAC---

CCTGGAGACTGCCCAGCAAGCCTCAGCATTCCGCCAACCTCACCCACGATGAACTGCTGATCCAGC  
TGCAGAAGAATATTCACCATGAGGTCTTGAGGGCAATGTGGGTTATCTACGAGTGGATGACCT  
CCCGGGTCAGGAGTACTGAGTGAACCTGGGGGATTCTGGTGGCTCACGTGTGGAAGAAGTCA  
TGGGCACCTCCGCTTGGTGTGGATCTTCGCCACTGCACTAGAGGTCACGTCTCTGGCATCCCCT  
ATGTCATCTCCTATCTGCACCCCGGAATACCGTCGTGCACGTGGACACCATCTATGATCGCCCC  
TCCAACACCACCACGGAGATCTGGACCTTGCCCAAAGTCTGGGAGAAAGGTACAGTGCCGACAA  
GGACGTGGTGGTTCTCACCAGCAGTCGCACAGGCGGTGTGGCCGAGGACATCGCCTACATCCTCA  
AGCAGATGCGCAGGGCCATCGTGGTGGGAGAGCGGACTGAGGGGGGCGCCTGGATCTCCAGAA-

-----  
ACGACTTCCCCCTGGATGTTTCCCTCCCGCCAGGTGTGGCCTGAGGACCATGTGTTTCAATTTCCAGC  
CCAAGCTTCAACTACACAGGCCATGACTTTCAGCGCTTCTTTACGGACCTTCACTTTGAGGAAGG  
CTGGTACATGTGGCTACAGTCACGTGACCTGCTGGCAGGACTTCCAGCACCTGGTGTAGAAGTAT  
ACTGTCTGTATGGTGTGGGTCTGCCACACCTCGCACCTACATCTATGACCACAGCTTCCCCTAC  
AAGGACCCTGTGGCTGCACTCTATGAGGACGGTGTGACACAGTAGCCACACGCAGCATGGAGCT  
CTGTGGCCAGTGGCAGGGCCGCCA-----

-----  
TTAGAAAGGTTCCAACAAAGCAGATGGGCCAAAAGTAAGGAAGCATGTCATGATGGGCAGATTG  
CCAGCACCGAGAGGAAAGTGGGTCTGAGTGCTGGTCCCCTCTCTGGGAGACTAGCATTGAATGAA  
CAGAAATCTCTATGTGCCGAGACTCCTGCAGATGACGAAGATCTTGCTTGCTTAACCCGAAACAG  
CAGCATTCTGAAAGTGAATGAGTGGTTTTCTAGAAGTGATGAGTTGTAACT-----

GATACAAACAACATGAGGGGTAATCAAATGCTGAAGTAACTGGGGCATTAGAAGTTTTCAATA  
AAGTAAGCGGATATTCCTATTCTTCCAAGAAAATGGGTGTCCAGACACTGATCCTTGTCTCTGCT  
TTACTGTGTCAGAGTGAGACAGTCTGCTCCAAACC---

AGAGAGTAATATCAAAGATAAAATATTTGGGAAAATCTATC---

ATAAGAAGGCAGGCCTCCCAACTTGAACCATGTGACTGAAAATCTAATTCCAGGAGCATTGCT  
GCAGAACGACAAATAACACAAGAGCATTCTCT-----GGTG-----

CACAGATGTCCCAATCAGCCCTACCACCCTGTATGTAGAAGACACACCCGAGCCGCCCTGCATG  
CCTTCTACTGCAGTAAGCTGCTGGATCTGGTCTTCTGCTGGACGGCTCCTCCAGCTGTCTGAG  
GCTGAGTTTGAAGTGCTCAAGGCGTTTTGTGGTAGGCATGATGGAGAGGCTGCACATCTCGCAGA  
AGCGCATCCGCGTGGCCGTCGTGGAGTACCACGATGGCTCCCACGCCTACATCGAGCTCAAGGCC  
CGGAAACGGCCCTCAGAGCTGCGACAGATTGCCAGCCACGTGAAGTACGCTGGCAGCCAGGTGGC

CTCCACTAGCGAGGTCTTGAAGTACACCTGTTTCAAATCTTCGGCAACATTGACCGGCCAGAAG  
CTTCCCGCATCACGCTGCTCCTCACGGCCAGCCAGGAGCCCCGCGGATGGTCAGGAACCTG-----  
--GTCCGCTACGTC-----  
CAGGGCCTCGCTGTGGGCTTCCAAGCATTTATCAAAAAACAGCCCAAGTACCTCAAGTTGGGAGC  
TATTGATGTGGAACGTCTAAAGAACACACCAGTCAAATCTCCAGAAGGGTCACATAAAAGGAGC  
CCTTCATCTACCAATGATTTAACGACCCTTTTCATCGTTGATGGCATGCATTGTAAATCGTGTGT  
GTCAAACATTGAGAGTGCTTTATCTACACTCCAGTATGTAAGCCGCATAGCAGTTTCTTTAGAGA  
ATAGGTCTGCCATCGTAAAGTACAATGCCAGCTCTGCCACTCCAGAAACACTGAGAAAAGCAATA  
GAGTCTGTTTCACCAGGGCAATATAAAGTTAGCATTGCAAGTGATGTTGAAAGTACCTCCAACCTC  
TC--  
CCTCCTCCTCATCTCTTCAAAGGTTCTTTGAACATAGTTAGCCAGCCTCTGACTCAAGAACT  
GTGATAAATATTAGTGGAAATGACTTGTAATCTTGTGTACAGTCGATAGAGGGAATGATATCAA  
AAAGGCCAGGTGTAAAATCTATA---  
CGAGTCTCCCTTGCAAATAGCACTGGGACTGTTGAGTATGATCCACTGCT-----  
-----  
GCAGAGTGACTGTCCTTGGCCTGGACCTTGTTGACTGTGAA--CTAATCAAGGC-----  
-----TCTTGTAGAAGGGACACTTGTGACCTTACTT-AGAATCCAGTTTGGCTTAGTGTG--  
--TGAATTGAGAATATTGTTCTGGGATTTGGAATGCAACATTAATCACA-TTAGCAGGCTTACT-  
CTAATTTGTGTGTTGATAGCATGCAA-A-----CATG-  
TTTTGTCTGCCCTCTTGCTTCTACTTTCTCCAGGGAAGCCGCCAAAGAATGTCGACGTAGGAAAA  
AAGAGTATGTCAAATGTCTGGAGAGCCGAGTCGCAGTGCTGGAAGTCCAGAAC-  
AGAAGCTTATAGAGGAGCTGGAAACC-----  
ATTTATTTTCATATCTATCGTTTGCATGAACAACAAAACATATACTTTCCATTGTACACAGAAAG  
ACTTGGTAG---  
ATGTTCCCAAAGATAGATATGGCCATTCCATTGATGTGGTGTATAGTTGTGGGAAAAGTATGGA  
TGTTCTCTTTGGAGACCAGTCTACATGCCTTCTTCCCAAAGAACCACAGAAACATGGGGTAGGG  
TAGCTGACTGCCTGCTCCGTGTTTTTCTGGTGGATTTTGAATTTGGGTGTGCTGCATCATATGTT  
CTTCCAGAAC-----  
AGCTATCTTTTCATGTCTCTGTTGCCAGAAACGATAACATTTACATTTTCAGGAGGACACTCACTT  
GTGAACAATATCCA?CCTGCCGATCTGTACAGAATAAGGGTTGATTGTCCCCTGGGTAGCCCAGC  
TGTGAGTTGCACAATCTTAGAGGAGCATTGGGTGGGAGGTGGCAGTGAGGGAGACAGTAGCCAC  
GGGG---ACGGGTCTGAGTTTGATGAT---  
GAAGGAATGCTGAGTGACGACCCAGATGGYGCCAGGA---  
GCGAGCGAAGCCCCTCCAGGATGAGCAGTGCTGGTGTGAGGTCCAAAGAATCGAAAGGGGACAA  
TGAACCTGCCGGCACTCCTCATTGGGATGAWAGCCAATCCGTGCAGAACCCGGGCAGGAAGTTC  
TTCAGGAAGCCCCGCATCTCTGAGGAAGATGACAGAGGTACCTTGCTGACAGCAACACTAT---  
GGAAGTCCAGAGTACTCCACCGAACACTCCAAGTCTCAGGAAGCTGCTCTCAGCCAATCCAGGG  
AGGAAAGTGACAGTGACTCTCAGGAGGATAGCACAGAGAGTCCGTCCCAGGAAGACAGTTCAA  
TGGACAGGACTCCAGCAGTGAGTCCAGC---GAGGAAGTGGACCGGCCAT

Allactaga\_major

CTCTTACCATTTTCGGCAACGCTCTGGTCATTCTGGCTGTGATGACCAGCCGCTCGCTACGCGG  
CCACAGAACCTGTTTCTGGTGTGCTGGCTGCTGCGGACATCCTGGTGGCCACGCTTATCATTCC  
TTTTTCTCTAGCCAACGAGCTGCTGGGCTACTGGTACTTCCGGCGCACTTGGTGCAGGTCTACC  
TGGCGCTCGACGTGCTCTTCTGCACCTCGTCCATCGTGCACCTGTGTGCCATCAGTCTGGACCGGT  
ACTGGGCAAGTGGCCGCGCTAGAGTACAACCTCAAGCGCACCCCGCGCCGCATCAAATGCATC  
ATCCTCACCGTGTGGCTCATCGCAGCCATCATCTCGCTGCCGCCCTCATCTACAAGGGCGATCAG

GGCCCCAAACCCACGAGCGCCCCAATGCAAGCTCAACCAAGAGGCCTGGTACATCTTGGCCTC  
CAGCATCGGGTCTTTTTTTGCAACCCTGCCTCATCATGAATCCTCGT-----  
TTCATGGACATGGAGTGCTTCATGATTCTGAACCCAGCCAGCAGCTGGCCATCGCTGTGCTGTC  
CCTCACACTGGGCACCTTACGGTCTGGAGAACCTGTTGGTGTGTGTGCATCCTGCACTCAC  
GCAGCCTCCGCTGCCGGCCTTCTACCCTTCATTGGCAGCCTGGCAGTGGCTGACCTCCTGGGCA  
GTGTCATTTTTTGTCTACAGCTTTGTGCGACTTCCATGTGTTCCACCGTAAAGATAGCCCCAATGTG  
TTTCTGTTCAAACCTGGGTGGGGTCACGGCCTCCTTACAGCCTCCGTAGGCAGCCTGTTCCCTCAC  
GGCCATCGACAGGTACATATCTATTACAGGCCCTGGCCTATAAGAGGATCGTCACCAGGCCCA  
AGGCCGTGGTGGCCTTTTGTCTGATGTGGACCATCGCAATTGTCATTGCTGTGCTGCCCTCCTC  
GGATGGAACCTGCACCTGATGAAAAGACTGAAGGATCAGACACGGACAGACTGCTAAACAATGAC  
CA---  
TCAGAGATCACTTAACATCCTTGGGGCCAAGGATGACGATTCTGGGGGTACCAGCTGTTATGACC  
CTGACATTCTGGAAACTGATTTCCCATCCAGTGACATGTGTGATGGTGCCTCAGGGGTGCTCAG  
CCACAGAGGTTAAAAGGGGAAGCTGATCTCTTGTGCCTTGATCAGAAAAATCAAATAACCTAC  
CTTA---TGATGCTTCTCCTG---CCTCAGCAGCCAGCATTACCCTAAC---  
AGAGGAAGACAAACCACGGCCACTTCTTACTAGTGAAACAGAGCCAACCCACCAACTTGCTTCCA  
TGCAAATCAGCAATCCTAGTTCCCTGGCCAACATTGACTTTTATGCCCAAGTAAGTGACATTACA  
CCAGCAGGGAGTGTAGTCCTTTCTCCAGGCCAAAAGAATAAGGCAGGGATACCCCATGCGACAT  
CATGC---  
ATCCAGAAGTGATCTCAGTCTGCCAAGACAATTACAACATGGACAATGCCTACTTCTGTGAGGCA  
GATGCCAAAAAGTGCAAT-GCTGTGGCCCCCTCACATGGAAGTCAAATCACATGTAGAA---  
CCCAGCTTTAACCTATGAGCCCAGCAC---  
CCTGGAGACTGCCAGCAAGCCTCAGCATTGCGCAACCTCACCCACGATGAACTGCTGATCCAGC  
TGCAGAAGACTATTACCATGAGGTCTTGAGGGCAACGTGGGTTATCTACGAGTGGATGACCTC  
CCGGGCCAGGAGTACTGAGTGAACCTGGGGGATTCTGGTGGCTCACGTGTGGAAGAAGCTCAT  
GGGCACCTCCGCCTTGGTGTGGATCTTGCCTACTGACTAGAGGCCATGTCTCTGGCATCCCCTA  
TGTCGTCTCCTACCTGCACCCCGGAATACCGTTCGTGCACGTGGACACCATCTATGATCGCCCCTC  
CAACACCACCACGGAGATCTGGACCTTGCCCAAGGTCTGGGAGAGAGGTACAGTGTGACAAGG  
ACGTGGTGGTTCTACCAGCAGTCGCACAGGCGGTGTGGCCGAGGACATCGCCTACATCCTCAAG  
CAGATGCGCAGGGCCATTGTGGTGGGAGAGCGGACTGAGGGGGGCGCCCTGGATCTCCAGAA----  
-----  
ACGACTTCCCCTGGATGTTTTCCCTCCCGCCAGGTGTGGCCTGAGGACCATGTGTTCAATTTCCACG  
CCAAGCTTCAACTACACAAGCCATGACTTTCAGCGCTTCTTTACGGACCTTCACTTTGAGGAAGG  
CTGGTACATGTGGCTACAGTCACGTGACCTGCTGGCAGGACTCCAGCACCTGGTGTAGAAGTAT  
ACTGTCTGTATGGCGTGGGTCTGCCACACCTCGCACCTACATCTATGACCACAGCTTCCCCTACA  
AAGACCTGTGGATGCACTCTATGAGGACGGTGTGACACAGTAGCCACACGCAGCATGGAGCTC  
TGTGGCCAGTGGCAGGGCCGCCA-----  
-----  
TTAGAAAGGTTCCAACAAAGCAGATGGGCCAAAAGTAAGGAAGCATGTCATGATGGGCAGATTG  
CCAGCACCGAGAGGAAAGTGGGTCTGAGTGCTGGTCCCCTCTCTGGGAGACTAGCATTGAATGAA  
CAGAAATCTCTATGTGCTGAGACTCCTGCAGATAACGAAGATCTTGCTTGCTTAACCCGAAACAG  
CAGCATTCTGAAAGTGAATGAGTGGTTTTCTAGAAGTGRTGAGTTGTAACT-----  
GATACAAACAACATGAGGAGTAAATCAAATGCTGAAGTAACTGGGGCATTAGAAGTTTTCAATA  
AAGTAAGCGGATATTCCTATTCTTCCAAGAAAATGGGTGTCCAGACACTGATCCTTGTCTGCT  
TACTGTGTCAAAGTGAGACAGTCTGCTCCAAACC---  
AGAGAGTAATGTCAAAGATAAAATATTTGGGAAAATCTATC---

ATAAGAAGGCAGGCCTCCCCAACTTGAACCATGTGACTGAAAATCTAATTCCAGGAGCATTGCT  
GCAGAACGACAAATAACACAAGAGCATTCT-----GGTG-----  
CACAGATGTCCCAATCAGCCCTACCACCCGTATGTGGAAGACAYACCGGAGCCGCCCTGCATG  
ACTTCTACTGCAGTAAGCTGCTGGATCTGGTCTTCCTGCTGGACGGCTCCTCCCAGCTGTCCGAG  
GCTGAGTTTGAAGTGCTCAAGGCATTTGTGGTAAGCATGATGGAGAGGCTGCACATCTCGCAGA  
AGCGCATCCGCGTGGCCGTCGTGGAGTACCACGATGGCTCCCACGCCTACATTGAGCTCAAGGCC  
CGGAAACGGCCCTCAGAGCTGCGACAGATTGCCAGCCAGTGAAGTACGCTGGCAGCCAGGTGGC  
CTCCACTAGCGAGGTCTTGAAGTACACCCTGTTTCAAATATTCGGCAACATTGACCGGCCAGAAG  
CTTCCCGCATCAGCTGCTCCTCACTGCCAGCCAGGAGCCCCGCGGATGGTCAGGAACCTG-----  
--GTCCGCTACGTC-----  
CAGGGCTTGGCTGTGGGCTTCCATGCATTTATCAAAAAACAGCCCAAGTACCTCAAGTTGGGAGC  
TATTGATGTGGAACGTCTAAAGAACACACCAATCAAATCTCCAGAAGGGTCACATAAAAGGAGC  
CCTTCATCTACCAATGATTTAACGACCACTTTCATCGTTGATGGCATGCACTGTAAATCGTGTGT  
GTCAAACATTGAGAGTGCTTTATCTACACTCCAGTATGTAAGCCGCATAGCAGTTTCTTTAGAGA  
ATAGGTCTGCCATCGTAACGTACAATGCCAGCTCTGCCACTCCAGAAACACTGAGAAAAGCAATA  
GAGTCTGTTTACCAGGGCAATATAAAGTTAGCATTGCAAGTGTGTTGAAAGTACCTCCAACTC  
TCCCTCCTCCTCATCTCTCAAAGGTTCTTTGAACATAGTTAGCCAGCCTCTGACTCAAG  
AACTGTGATAAATATTAGTGAATGACTTGTAATCTTGTGTACAGTCGATAGAGGGAATGAT  
ATCAAAAAGGCCAGGTGTAATAAATCAATAAATAG?GGCTCCCTTGCAAATAGCACTGGGACTGTTG  
AGTATGATCC-----  
GCAGAGTGACTGTCCTTGGCCTGGACCTTGTTGACTGTGAA--CTAATCAAGGC-----  
-----TCTTGTAGAAGGGACACTTGTGACCCTTGCTT-AGAATCCAGTTTGGCTTAGTGTG--  
--TGAATTGAGAATATTGTTCTGGGATTTGGAATGCAACATTAATCACA-TTAGCAGGCTTACT-  
CTAATTTGTGTGTTGATAGCATGCAA-A-----CATG-  
TTTTGTCTGCCCTCTTGCTTCTAATTTCTCCAGGGAAGCCGCCAAAGAATGTCGACGTAGGAAAA  
AAGAGTATGTCAAATGTCTGGAGAGCCGAGTCGCAGTGCTGGAAGTCCAGAAC-  
AAGAAGCTTATAGAGGAGCTGGAAACC-----  
ATTTATTTTCATATCCATCATTGTCATGAACAACAAAACATTTACTTTCCATTGTACAGAGAAAG  
ACTTGGTAG---  
ATGTTCCCAAAGATAGATATGGCCATTCCATTGATGTGGTGTATAGTTGTGGGAAAAGTATGGA  
TGTTCTCTTTGGAGACCAGTCTACATGCCTTCTTCCAAAGAACCACAGAAACATGGGGTAGGG  
TAGCTGACTGCCTGCTCCGTGTTTTTCTGGTGGATTTTGAAGTTGGGTGTGCTACATCATACT  
CTTCCAGAAC-----  
AGCTATCTTTTCATGTCTCTGTTGCCAGAAATGATACCGTTTACATTTCCAGGAGGACACTCACTT  
GTGAACAATATCTG?CCTGCCGATCTGTACAGAATAAGGGTTGATTGTCCCCTGGGTAGCCCAGC  
TGTGAGTTGCACAATCTTAGAGGAGCATTGGGTGGGAGGTGGCAGTGAGGGAGATAGTAGCCAC  
GGG---ACGGGTCTGAGTTTGATGAT---  
GAAGGAATGCTGAGTGACGACCCAGATGGCGCCAGGA---  
GTGAGCGAAGCCCCTCCAGGATGAGCAGTGCTGGTGTGAGGTCCAAAGAATCGAAAGGGGACAA  
TGAACCGGCCGGCACTCCTCATTGGGATGACAGCCAATCCGTGCAGAACCCGGGCAGGAAGTTCT  
TCAGGAAGCCCCGCATCTCTGAGGAAGATGACAGAGGTCACCTTGCTGACAGCAACTAT---  
GGAAGTCCAGAGTGACTCCACTGAACACTCCAAGTCTCAGGAAGCTGCCCTCAGCCAATCCAGGG  
AGGAAAGTGACAGCGACTCTCAGGAGGACAGCACAGAGAGTCCGTCCCAGGAAGACAGTTCAA  
TGGACAGGACTCCAGCAGTGAGTCCAGC---GAGGAAGTGGACCAGCCAT

*Alactagulus\_pumillio*

CTCTTACCATTTTCGGCAACGCGCTGGTCATTCTGGCTGTGATGACCAGCCGCTCGCTACGCGC

ACCACAGAACCTGTTTCTGGTGTGCTGGCTGCTGCGGACATCCTGGTGGCCACGCTTATCATTC  
CTTTTTCTCTAGCCAACGAGCTGCTGGGCTACTGGTACTTCCGGCGCACTTGGTGGAGGTCTAC  
CTGGCGCTCGACGTGCTCTTCTGCACCTCGTCCATCGTGCACCTGTGTGCCATCAGTCTGGACCGG  
TACTGGGCAGTGAGCCGCGCGCTAGAGTACAACCTCCAAGCGCACCCCGCGCCGCATCAAATGCAT  
CATCCTCACCGTGTGGCTCATCGCAGCCATCATCTCACTGCCGCCCTCATCTACAAGGGCGATCA  
GGGCCCCCAAACCCACGAGCGCCCCCAATGCAAGCTCAACCAAGAGGCCTGGTACATCTTGGCCT  
CCAGCATCGGGTCTTTTTTGCACCCTGCCTCATCATG-ATCCTCGT-----  
TTCATGGACATGGAGTGCTTCATGATTCTGAACCCAGCCAGCAGCTGGCCATCGCTGTGCTGTC  
CCTCACACTGGGCACCTTACAGTCTGGAGAACCTGCTGGTGTGTGTGCATCCTGCACTCAC  
GCAGCCTCCGCTGCCGGCCTTCTACCCTTCAATTGGCAGCCTGGCAGTGGCTGACCTCTTGGGCA  
GCGTCATTTTTGTCTACAGCTTTGTGCGACTTCCATGTGTTCCACCGTAAAGATAGCCCCAATGTG  
TTTTCTGTTCAAGCTGGGCGGGGTCACGGCCTCCTTACAGCCTCCGTAGGCAGCCTGTTCTCAGC  
GCCATCGACAGGTACATATCYATTCACAGGCCCTGGCCTATAAGAGGATCGTCACCAGGCCCAA  
GGCCGTGGTGGCCTTTTTGTCTGATGTGGACCATCGCAATTGTCATTGCTGTGCTGCCCTCCTCG  
GATGGAAGTGCACCTGATGAAAAGACTGAAGGATCAGACACGGACAGACTTCTAAACAATGACC  
A---  
TCAGAGATCACTTAACATCCTTGGGGCCAAGGATGATGATTCTGGGCGTACCAGCTGTTATGACC  
CTGACATTCTGGAAACTGATTTCCCATCCAGTGACATGTGTGATGGTGCCTCAGGGGTGCTCAG  
CCACAGAGGTTAAAAGGGGAAGCTGATCTTGTGCCTTGATCAGAAAAATCAAATAACCTAC  
CTTA---TGATGCTTCTCCTG---CCTCAGCAGCCAGCATTACCCTAAC---  
AGAGGAAGACAAACCACGGCCACTTCTACTAGTGAACAGAGTCAACCCACCAACTTGCTTCCA  
TGCAAATCAGCAATCCTATTTCCCTGGCCAACATTGACTTTTATGCCAAGTAAGTGACATTACA  
CCAGCAGGGAGTGTAGTCCTTTCTCCAGGCCAAAAGAGTAAGGCAGGGATACCCCATGCGACAT  
CATGC---  
ATCCAGAAGTGATCTCAGTCTGCCAAGACAATTACAACATGGACAATGCGTACTTCTGTGAGGTA  
GATGCCAAAAAGTGCATT-GCTGTGGCCCCTCACATGGAAGTCAAATCACATGTAGAA---  
CCCAGCTTTAACCTATGAGCCCAGCAC---  
CCTAGAGACTGCCCAGCAAGCCTCAGCATTGCGCAACCTCACCCACGATGAACTGCTGATCCAGC  
TGCAGAAGAATATTCACCATGACGTCTTGAGGGCAACGTGGGTTATCTACGAGTGGATGACCTC  
CCGGGCCAGGAGTACTGAGTGAACCTTGGGGCATTCTGCTGGTGGCTCACGTGTGGAAGAAGCTCAT  
GGGCTCCTCCGCCTTGGTGTGCTGGATCTTCCGCACTGCACTAGAGGCCACGTCTCTGGCATCCCCTA  
TGTCGTCTCCTATCTGCACCCCGGAATACCGTCTGTCACGTGGACACCATCTATGATCGCCCCTC  
CAACACCACCACGGAGATCTGGACCTTGCCAAGGTCTGGGAGAGAGGTACAGTGTGACAAGG  
ACGTGGTGGTTCTCACCAGTAGTCGCACAGGCGGGGTGGCCGAGGACATCGCCTACATCCTCAAG  
CAGATGCGCAGGGCCATCGTGGTGGGAGAGCGGACGGAGGGGGGCGCCCTGGATCTCCAGAA----  
-----  
ACGACTTCCCCAGGATGTTTCTTCCCAGGTTGGCCTGAGGACCATGTGTTTCAATTTCCAC  
GCCAAGCTTCAACTACACAGGCCATGACTTTACGCGCTTCTTTACGGACCTTCACTTTGAGGAAG  
GCTGGTACATGTGGCTACAGTACGTGACCTGCTGGCAGGCCTCCAGCACCTGGTGTAGAAGTA  
TACTGTCTGTATGGCGTGGGTCTGCCACACCTCGCACCTACATCTATGACCACAGCTTCCCCTAC  
AAGGACCCTGTGGCTGCACTCTATGAGGACGGTATGACACAGTGGCCACACGCAGCATGGAGCT  
CTGTGGCCAGTGGCAGGGCCGCA-----  
-----  
TTAGAAAGGTTCCAACAAAGCAGATGGACCAAAGTAAGGAAGCATGTCATGATGGGCAGATTG  
CCAGCACCGAGAGGAAAGTGGGTCTGAGTGTGGTCCCCTCTCTGGGAGACTAGCATTGAATGAA  
CAGAAATCTTTATGTGCCRAGACTCCTGCAGATAACGAAGATCTTGCTTGCTTAACCCGAAACAG



CAGCATTCTGAAAGTGAACGAGTGGCTTTCCAGAAGTGATGAGTTGTAACT-----  
GATACAAACAACATGAGGGGTAAATCAAATGCTGAAGTAACTGGGGCATTAGAAGTTTTCAATA  
AAGTAAGCGGAAATTCCTATTCTTCCAAGAAAATGGGTGTATCAGACACTGATCCTTGTCTGCT  
TTACTGTGTCAAAGTGAGACAGTCTGCTCCAAACC---  
AGAGAGTAATATCAAAGATAAAATATTTGGGAAAATCTATC---  
ATAAGAAGGCAGGCCTCCCAACTTGAACCATGTGACTGAAAATCTAATTCAGGAGCATTGCT  
ACAGAACGACAAATAACACAAGAGCATTCTC-----GGTG-----  
CACAGATGTCCCAATCAGCCCTACCACCCGTATGTAGAAGACACCCCGAGCCGCCCTGCACGA  
CTTCTACTGCAGTAAGCTGCTGGATCTGGTCTTCCCTGCTGGACGGCTCCTCCCAGCTGTCYGAGG  
CTGAGTTTGAAGTGTCAAGGCGTTTGTGGTCAGCACAATGGAGAGGCTGGACATCTCGCAGAA  
GCGCRTCCGCGTGGCCGTCTGGAGTATCACGATGGTTCCACGCCTACATCGAGCTCAAGACCC  
GGAAACGGCCCTCAGAGCTGCGACACATTGCCAGCCACGTGAAGTACGCTGGCAGCCAGGAGGCC  
TCCACCAGCGAGGTCTTGAAGTACACCCTGTTCAAATATTCGGCAACATTGATCGGCCAGAAGC  
TTCCCGCATCACGCTGCTCCTCACCGCCAGCCAGGAGCCCCCGGGATGGTCAGGAACCTG-----  
GTCCGCTACGTC-----  
CAGGGCTTGGCTGTGGGCTTCCAAGCATTATCAAAAAACAGCCCAAGTACCTCAAGTTGGGAGC  
TATTGATGTGGAACGTCTAAAGAACACACCAGTCAAATCTCCAGAAGGGTCACATAAAAGGAGC  
CCTTCATGTACCAATGATTTAACGACCACTTTCATCGTTGATGGCATGCATTGTAAATCGTGTGT  
GTCAAACATTGAGAGTGCTTTATCTACACTCCAGTATGTAAGCCACATAGCAGTTTCTTTAGAGA  
ATAGGTCTGCCATCGTAAAGTACAATGCCAGCTCTGCCACTCCAGAAACACTAAGAAAAGCAATA  
GAGTCTGTTTCACCAGGGCAATATAAAGTTAGCATTGCAAGTGATGTTGAAAGTACCTCCAACTC  
TC---  
CCTCCTCCTCATCTCTTCAACAAGGTTCTTTGAACATAGTTAGCCAGCCTCTGACTCAAGAACT  
GTGATAAATATTAGTGGAAATGACTTGTAATCTTGTGTACAGTCGATAGAGGGAATGATATCAA  
AAAGGCCAGGTGTAAATCTATA---  
CGAGTCTCCCTTGCAAATAGCACTGGGACTGTTGAGTATGATCCACTGCT-----  
-----  
GCAGAGTGACTGTCCTTGGCCTGGACCTTGTGACTGTGAA--CTAACCAAGGC-----  
-----TCTTGTAGAAGGGACACGCGTGGCCCTTACTT-AGAACCCAGTTTGGCTTAGTGTG---  
---TGAATTGAGAATATTGTTCTGGGATTTGGAATGCAACATTAATCACA-TTAGCAGGCTTACT-  
CTAATTTGTGTGTTGATAGCATGCAA-A-----CATG-  
TTTTGTCTGCCCTCTTGCTTCTACTTTCTCCAGGGAAGCCGCCAAAGAATGTCGACGTAGGAAAA  
AAGAGTATGTCAAATGTCTGGAGAGCCGAGTCGCAGTGTGGAAGTCCAGAAC-  
AGAAGCTTATAGAGGAGCTGGAAACC-----  
ATTTATTTTCAATTTCTATTGGTTGCATGAACAACAAAACATATATTTTCCATTGTACAGAGAAAG  
ACTTGGTAG---  
ATGTTCCCAAAGATAGATATGGCCATTCCATTGATGTGGCGTATAGTTGTGGGAAAAGTATGGA  
TGTTCTTTGGAGACCAGTCTACATGCCTTCTCCCAAAGAACCACAGAAACATGGGGTAGGG  
TAGCTGACTGCCTGCTCCGTGTTTTTCTGGTGGATTTTGAATTTGGGTGTGCTACATCATACTT  
CTTCCAGAAC-----  
AGCTATCTTTTTCATGTCTCTGTTGCCAGAAATGATATCATTTTACATTTTCCAGGAGGACTCACTT  
GTG---  
AATATCCA?TCTGCTGATCTGTACAGAATAGGGGTTGATCGTCCCCTGGGTAGCCAGCTGTGAG  
TTGCACAATCTTAGAGGAGCAGTGGGTGGGAGGTGGCAGTGAGGGTGACAGTAGCCACGGGG---  
ACGGGTCTGAGTTTGTATGAT---GAAGGAATGCTGAGTGTGACCCAG---GCGCCAGGA---  
GCGAGCGAAGTCCCTCCAGGATGAGCAGTGTGTTGCTCAGGTCCAAAGAATCGAAAGGGGACAA

TGAGCCTGCCGGCACTCCTCATTGGGATGACAGCCAATCCGTGCAGAACCCAGGCAGGAAGTTCT  
TCAGGAAGCCCCGCATCTCTGAGGAAGAYGACAGAGGTCACCTTGTGACAGCAACTAT---  
GGAAGTCCAGAGTGACTCCACCGAACACTCCAAGTCTCAGGAAGCTGCTCTCAGCCAATCTAGGG  
AGGAAAGTGACAGCGACTCTCAGGAGGAYAGCACAGAGAGTCCGTCCAGGAAGACAGCTCAA  
TGGACAGGACTCCAGCAGTGAGTCCAGC---GAGGAAGTGGACAGGCCAT

*Eremodipus lichtensteini*

CTCTTACCATTTTCGGCAACGCGTTGGTCATTCTGGCAGTGTTGACCAGCCGCTCGCTACGCGC  
ACCACAGAACCTGTTTCTGGTGTGCTGGCTGCGGCTGACATCCTGGTGGCCACGCTCATCATTC  
CTTTTTCTTAGCCAACGAGCTGCTGGGCTACTGGTACTTCCGGCGTACCTGGTGGAGGTCTAC  
CTGGCGCTCGACGTGCTTCTGACCTCGTCCATCGTGCACCTGTGCGCCATCAGCCTGGACCGG  
TACTGGGCAGTGAGCCGCGCGCTGGAGTACAACCTCCAAGCGCACCCCGCGCCGCATCAAATGCAT  
CATCCTCACCGTGTGGCTCATCGCAGCCATCATCTCGTGGCGCCCTCATCTACAAGGGCGACCA  
GGGCCCCAAACCCACGAGCGCCCCAATGCAAGCTCAACCAAGAGGCCTGGTACATCTTGGCCT  
CCAGCATCGGGTCTTTTTTGCACCCTGCCTCATCATG-ATCCTCGT-----

TTCATGGACATGGAGTGTTCATGATTCTGAACCCAGCCAGCAGCTGGCCATCGCTGTGTTATC  
CCTCACACTGGGCACCTTACAGTCCTGGAGAACCTGCTGGTGTGTGTGCATCCTGCACTCAC  
GTAGCCTCCGCTGCCGGCCTTCTACCCTTATTGGCAGCCTGGCAGTGGCTGACCTCCTGGGCA  
GTGTCAATTTTCGTCTACAGCTTTGTCGACTTCCATGTGTTCCACCGTAAGGATAGCCCCAATGTG  
TTTCTGTTCAAACCTGGGTGGTGTACGGCCTCCTTACGGCCTCCGTAGGCAGCCTGTTCTCAC  
AGCCATCGACAGGTACATATCTATCCACAGGCCCTGGCCTATAAGAGGATCGTCACCAGGCCCA  
AGGCTGTGGTGGCCTTTTGCCTGATGTGGACCATCGCAATTGTCATTGCTGTGCTGCCCTTCTC  
GGCTGGAAGTGCACCTGATGAAAAGACTGAAGGCTCAGACACGGACAGACTTCTCAACAATGACC  
A--

TCAGAGATCACTTAACATCCTTGGGGCCAAGGATGATGATTCTGGGCGTACCAGCTGTTATGACC  
CTGACATTCTGGAAACTGATTTCCCAGCCAGTGACATGTGTGATGGTGCCTCAGGGGTTGCTCAG  
CCACAGAGGTTAAAAGGGGAAGTTGATCTCTTGTGCCTTGATCAGAAAAATCAAATAACCTAC  
CTTA---TGATGCTTCTCCTG---CCTCAGCAGCCAGCACTACCCTAAC---

AGAGGAAGACAAACCACAACCCTTCTTACTAGTGAAACAGAGTCAACCCACCAACTTGCCTCCA  
TGCAGATCAGCAATCCTAGTTCCCTGGCCAACATCGACTTTTATGCCCAAGTAAGTGACATTACA  
CCAGCAGGGAGTGTAGTCCTTTCCCAGGCCAAAAGAGCAAGGCAGGGATACCCCATGCGACAT  
CATGC---

ATCCAGAAGTGATCTCAGTCTGCCAAGCCAATTACAACCTGGACAGTGCCTACTTCTGTGAGGCA  
GATGCCAAAAGTGCAAT-GCTGTGGCCCTCACATGGAAGCCAAGTCCAATGTAGAG---  
CCCAGCTTTAACCTATGAGCCCAGCAC---

CCTTGAGACGTCCCAGCAAGCCTCAGCATTCACCAACCTCACCCACGATGAGCTGCTACTCCAGG  
TGCAGAAGAACATTTCGCCATGAGGTCTGGAGGGCAACGTGGGCTATCTACGAGTGGATGACCTC  
CCGGGCCAGGAGTACTGAGTGAACCTGGGGGGTTCTGGTGGCTCACGTGTGGAGGAAGCTCAT  
GGGCACCTCCGCCTTGGTCTGGATCTTCCGCACTGCACTGGGGGCCACGTCTCCGGCATCCCCTA  
CGTCATCTCCTATTTGCATCCCGGGAATACCGTGTGCACGTGGACACCATCTACGATCGGCCCT  
CCAACACCACCAGGAGATCTGGACCTTGCCCAAGGTCTGGGAGAGAGGTACAGCGCGGACAAG  
GACGTGGTGGTCTCACCAGCAGTCTCACGGGAGGCGTGGCCGAGGACATCGCTACATCTCAA  
GCAGATGCGCAGGGCCATCGTGGTGGGTGAGCGCACTGAGGGGGGCGCCCTGGACCTCCAGAA----

-----  
ACGACTTCCCCCTGGATGTTTCCCTCCCGCCAGGTGTGGCCTGAGGACCATGTGTTCAATTTCCACG  
CCAAGCTTCAACTACACAGGCCATGATTTTCAGCGCTTCTTTACGGACCTTCACTTTGAGGAAGG  
CTGGTACATGTGGCTACAGTCACGTGACCTGCTGGCAGGGCTCCCGGCCCTGGCGTAGAAGTAT

ACTGTCTGTATGGCGTGGGCCTGCCACACCCCGCACCTACATCTATGACCACAGCTTCCCCTACA  
AAGACCTGTGGCTGCGCTCTATGAGGACGGTGATGACACAGTCGCCACACGCAGCATGGAGCTC  
TGTGGCCAGTGGCAGGGCCGCCA-----

TTAGAAAAGATCCAACCAAGCAGATGGGCCAAAAGCAAGGAAGCATGTCACGATGGGCAGATCG  
CCAGCCCCGAGAGGAAGGTGGGTCTGAGTGCTGGTCCCCTCTCTGGGAGACAAACATTGAATGAG  
CAGAAACCTGTGTGCTCCGAGACTCCTGCAGGTAATGAAGGTCCTACTTGGTTAACCCGAAACAG  
CAGCATTCTGAAGGTGAACGAGTGGTTTTCCAGAAGTGGTGAGTTGTAACTTTTTCTGATACA  
GACAGCGTGAGGGGCGAATCAGATGCCGAAGTAGCTGGGGCTGTACAAGTTGTCGGTGAAGTAA  
GCGGATATTCTGTTCTTCCAAGAGAACGGGGCTCCCGGACACAGATGCTTGTCTGCTGTGCTA  
TGTCAAAGTGAGACTGTCTGCTCAAACC---

AGAGAGTAATATCAAAGATAAAATATTTGGGAAAACCTTATC---  
ATAAGAAGGCAGGCCTCACCAATTTGAACCATGTGACTGAAAATCTAATTCCAGGAGCATTTGC  
TGCAGAACCACAAATAACACAAGAGCATCCCC-----GGTG-----

CACGGATCCCCGCTCAGCTTGACCACGCCGTATGTGGAGGGCAGCCCCGAGCCGCCCTGCACGA  
CTTCTACTGCAGCAAGCTGCTGGATCTGGTCTTCTGCTGGACGGCTCCTCCAGGCTGTCTGAGG  
CCGAGTTTGAGGTGCTCAAGGCCTTCGTGGTGGGCGCGATGGAGAGGTTGCACATCTCCAGAAG  
CGCGTCCGCGTGGCCGTGGTCGAGTACCACGATGGCTCCCACGCCTACATCGAGCTCAGGGCCCG  
GAGGCGGCCCTCGGAGCTGCGCCGCCTGGCCGGCCAGGTGAAGTACGCGGGCAGCCGGGTGGCCT  
CCGCGAGCGAGGTCTTGAAGTACACCCTCTTCCAGATCTTCGGCAAGGTGGACCGCCAGAAGCC  
TCCCGCGTCGCGCTGCTCCTCACCGCCAGCCAGGAGCCCCACGCATGGCCCCGAACCTG-----  
CTCCGTTACGTC-----

CAGGGCCTCGCTGTGGGTTTCCAGGCATTTATCAAAAAACAGCCCAAGTACCTCAAGTTGGGAGC  
TATTGATGTGGAGCGTCTAAAGAACACACCAGTCAAATCTCCAGAAGGGTCACAGAAAAGGAGT  
CCCTCATCTACCAATGATTTAACGGCCACTTTCATTGTTGATGGCATGCATTGTAAATCGTGTGT  
GTCAAACATCGAGAGTGCTTTATCTACACTCCAGTATGTAAGCAGCATAGCAGTTTCTTTAGAGA  
ATAGGTCTGCCATTGTAAAGTACAATGCCAGCTCTGCCACTCCAGAAGCACTGAGAAAAACAATA  
GAGTCTGTTTACCAGGGCAATATAAAGTTAGCATTGCAAGTGATGTTGAAAGTACCTCCAACTC  
TC--

CCTCCTCCTCATCTCTTCAAAGGTTCTTTGACATAGTTAGCCAGCCTCTGACTCAAGAAACC  
GTGATAAATATTAGTGAATGACTTGTAATCTTGTGTACAGTCTATAGAAGGTTTGATATCAA  
AAAGGCCAGGTGTAAATCTATA---  
CGAGTCTCCCTTGCAAATAGCACTGGGACTGTTGAGTATGATCCACTGCT-----

GCAGAGTGACTGTCCTTGGCCTGGACCTTGTGACTGTGAACTCTAATCAAGGC-----  
-----TCTTGTAGAAGGGACACTTGTGACCCTTACTT-AGAATCCAGTTTGGCTTAGTGTG--  
---TGAATTGAGAATATTGTTCTGGGATTTGGAATGCAACATTAATCACA-TTAGCGGGCTTACT-  
CTAATTTGTGTGTTGGTAGCATGCAA-A-----CATG-  
TTTTGTCTGCCCTCTTGCTTCTACTTTCTCCAGGGAAGCCGCCAAAGAGTGTCGACGTAGGAAAA  
AGAATATGTCAAATGTCTGGAGAGCCGAGTCGCCGTGCTGGAAGTCCAGAAC-  
AAGAAGCTTATAGAGGAGCTGGAAACC-----

TCGAGGGAAAAGYATGGGTGTTCTCTTTGGAGGGCGGTCTACATGCCTTCTACACAAAGAACCA  
CAGAAACGTGGAATAGGGTAGCTGACTGCTTGCCCCATGTTTTCTGGTAGATTTTGAATTTGCC  
TGTGCTACATCATACATACTTCCAGAACTTCAGGATGGGCTATCTTTTCATGTCTCCATTGCCAG  
AAATGATAACATTTACATTTTAGGAGGACACTCGCTTGCCAGTAACACCCGCCCTGCTAATCTGT

ACAGAATAAGGGTTGATCTTCCCCTGGGTATCCCAGC-----  
GAGGAGCACTGGGTGGGAGGTGGCAGTGAGGGAGACAGTAGCCACGGGG---  
ACGGGTCTGAGTTTGACGAT--GAAGGCATGCTGAGCGACGACCCAGATGGSGCCTGGA---  
GTGAGCGAGGCCCTCCAGGATGGGCAGTGCTGGTGTGACAGGTCTAAAGAAGCGAAAGGGGACAA  
CGAACCGGCCAGCACCCCGGATTCCGATGACAGCCAATCCGTGCAGAATCCAGGCAGGAAGTTCT  
TCAGAAAGCCCCGCATTTCTGGGAAGATGACAGAGGTCACCTTGCTGGCAGCAACACAAT---  
GGAAGTGCAGAGTGACTCCACGGAAAACCTCCAAGTCTCAGGAGGCTGGTCTCGGCCCATCCACGG  
AGGAAAGCGACAGCGACTCTCAGGAGGACAGCACAGACAGCCCCGTCCAGGAGGACAGTTCCAAT  
GGGCAAGACTCCAGCAGTGAGTCCAGC--GAAGAGGCGGACCGGCCAT

Dipus\_sagitta

CTCTTACCATTTCGGCAACGCGTTGGTCATTCTGGCAGTGCTGACCAGCCGCTCGCTACGCGC  
ACCACAGAACCTGTTTCTGGTGTGCTGGCTGCGGCGGACATCCTGGTGGCCACGCTTATCATTC  
CTTTTTCTCTAGCCAACGAGCTGCTGGGCTACTGGTACTTCCGGCGCACCTGGTGGAGGTCTAC  
CTGGCGCTCGACGTGCTCTTCTGCACCTCGTCCATCGTGCACCTGTGCGCCATCAGCCTGGACCGG  
TACTGGGCAGTGAGCCGCGCGCTGGAGTAACTCCAAGCGCACCCCGCGCCGCATCAAATGCAT  
CATCCTCACGGTGTGGCTCATCGCAGCCATCATCTCGCTGCCGCCCTCATCTACAAGGGCGACCA  
GGGCCCCCAAACCCACGAGCGCCCCCAATGCAAGCTCAACCAAGAGGCCTGGTACATCTTGGCCT  
CCAGCATCGGGTCTTTTTTGCACCCTGCCTCATCATG-ATCCTCGT-----  
TTCATGGACATGGAGTGTTCATGATTCTGAACCCAGCCAGCAGCTGGCCATTGCTGTGCTGTC  
CCTCACACTGGGCACCTTACAGTCCTGGAGAACCTTCTGGTGTGTGTGTCATCCTGCACTCAC  
GCAGCCTCCGCTGCCGGCCTTCTACCCTTCAATTGGCAGCCTGGCAGTGGCTGACCTCCTGGGCA  
GCGTCATTTTTGTCTATAGCTTTGTGACTTCCATGTGTTCCACCGTAAGGATAGCCCCAATGTG  
TTTCTGTTCAAACCTGGGTGGGGTACGGCCTCCTTTACAGCCTTCGTAGGCAGCCTGTTCTTAC  
GGCCATCGACAGGTACATATCTATTACAGGCCCTGGCCTATAAGAGGATCGTCACCGGCCC?A  
AGGCTGTGGTGGCCTTTTGCCTGATGTGGACCATC-----  
ATTGCTGTGCTGCCCCTCCTCGGCTGGAAGTGCACCTGATGAAAAGACTGAAGGCTCAGACACGG  
ACAGACTTCTAAACAATGATCG---  
TCAGAGATCACTTAACATCCTTGGGGCCAAGGATGATGATTCTGGGCGTACCAGCTGTTATGACC  
CTGACATTCTGGAACTGATTTCCCAGCCAGTGACATGTGTGATGGTGCCTCAGGGGTGCTCAG  
CCACAGAGGTTAAAAGGGGAAGCTGATCTCTTGTGCCTTGATCAGAAAAATCAAATAACCTAC  
CTTA---TGATGCTTCTCCTG---CCACTCAGCAGCCCAGCACTACCCTAAC---  
AGAGGAAGACAAACCACAACCCTTCTTACTAGTGAAACAGAGTCAACCCACCAACTGCCTCCA  
TGCAGATCAGCAATCCTAGTTCCCTGGCCAACATCGACTTTTATGCCCAAGTAAGTGACATTACA  
CCAGCAGGGAGTGTAGTCCTTTCCCCAGGCCAAAAGAACAAGGCAGGGATACCCACATGTGACCT  
AATGC---  
ATCCAGAAGTGATCTCAGTCTGCCAAGCCAATTACAACCTGGACAGTGCCTACTTCTGTGAGGCA  
GATGCCAAAAAGTGCATT-GCTGTGTCCCCTCACATGGAAGCCAAATCACATGTAGAG---  
CCCAGCTTTAACCTATGAGCCCAGCAC---  
CCTTGAGACGTCCCAGCAAGCCTCAGCCTTACCAACCTCACCCGCGATGAGCTACTGCTCCAGGT  
GCAGAAGAACATTCGCCATGAGGTCTGGAGGGCAACGTGGGTTATCTACGAGTGGATGACCTCC  
CGGGCCAGGAGGTACTGAGTGAACCTGGGGGGTTCCTGGTGGCTCACGTGTGGAGGAAGCTCAT  
GGGCACCTCCGCCTTGGTGTGATCTTCGCCACTGCACTGGGGGCCAAGTCTCTGGCATCCCCTA  
CGTCATCTCCTATCTGCATCCCGGAATACCGTCGTGCACGTGGACACCATCTACGATCGCCCCTC  
CAACACCACCACGGAGATCTGGACCTTGCCAAGGTCTGGGAGAGAGGTACAGTGTGACAAGG  
ACGTGGTGGTACTCACCAGCAGTCGCACGGGAGGCGTGGCCGAGGACATCGCCTACATCCTCAAG  
CAGATGCGCAGGGCCATCGTGGTGGGTGAACGCACTGAGGGAGGCGCCCTGGACCTCCAGAA-----

-----  
ACGACTTCCCCCTGGATGTTTCCCTCCCGCCAGGTGTGGCCTGAGGACCATGTGTTTCCACG  
CCAAGCTTCAACTACACAGCCCATGACTTTCAGCGCTTCTTTACGGACCTTCACTTTGAGGAAGG  
CTGGTACATGTGGCTACAGTCACGTGACCTGCTGGCAGGGCTCCAGCACCTGGCGTAGAAGTAT  
ACTGTCTGTATGGCGTGGGCCTGCCACACCCCGCACCTACATCTATGACCACAGCTTCCCCTACA  
AAGACCCTGTGGCTGCGCTCTATGAGGACGGTGATGACACAGTAGCCACACGCAGCATGGAGCTC  
TGTGGCCAGTGGCAGGGCCGCCA-----

-----  
TTAGAAAGGATCCAACCAAGCAGATGGGCCAAAAGCAAGGAAGCATGTCACGATGGGCAGATCG  
CCAGCCCCGAGAGGAAGGTGGGTCTGAGTGCTGGTCCCCTCTCTGGGAGACAAACATTGAATGAG  
CAGAAACCTGTGTGCTCCGAGACTACTGCAGATAATGAAGGTCCTGCTTTGTTAACCCGAAACAG  
CAGCATTCTGAAGGTGAACGAGTGGTTTTCCAGAAGTGGTGAGTTGTTAACTTTTGCTGATACA  
GACAGCGTGAGGGGTGAATCAAATGCCGAAGTAGCTGAGGCTGTACAAGTTGTTGGTGAGGTAA  
GCGGATATTCCTGTTCTCCAAGAGAACSOGGTGTCCCGACACGGATCCTTGTCTGCTGTACTA  
TGTGAAAGTGAGACAGTCTGCTCCAAACC---

AGAGAGTAATATCAAAGATAAAATATTTGGGAAAACCTATC---  
GTAAGAAGGCAGGTCTACCAACTTGAACCATGTGACTGAAAATCTAATTCCAGGAGCATTGCT  
GCAGAACCACAAATAACACAGGAGCATCCCT-----GGTG-----

CACGGATGCCCGCTCAGCTCCACCACGCCCTATGTGGAGGACACACCCGAGCCGCCCTGCACGA  
CTTCTACTGCAGCAAGCTGCTGGATCTGGTCTTCTGCTGGACGGCTCCTCCAGGCTGTCCGAGG  
CCGAGTTTGAGGTGCTCAAGGCCTTCGTGGTGAGCACGATGGAGAGGCTGCACATCTCCAGAAG  
CGCATCCGCGTGGCCGTGGTTCGAGTACCACGACGGCTCCACGCCTACATCGAGCTCAGGGCCCG  
GAAGCGGCCCTCGGAGCTGCGTCATCTCGCCAGCCAGGTGAAGTATGCGGGCAGCCAGGTGGCCT  
CCACGAGCGAGGTCTTGAAGTACACCCTCTTCCAGATCTTCGGCAAGGTTGACCGGCCAGAAGCC  
TCCCGCGTCGCGCTGCTCCTCACCGCCAGCCAGGAGCCCCACGGATGTCCCGCAACCTG-----  
GTCCGTTACGTC-----

CAGGGCTTGGCTGTGGGTTTTCCAGGCATTTATCAAAAAACAGCCTAAGTACCTCAAGTTGGGAGC  
TATTGATGTGGAGCGTTTAAAGAACACACCAGTCAAATCTCCAGAAGGGTCACAGAAAAGGAGT  
CCCTCATCTACCAATGATTTAACAGCCACTTTCATCGTTGATGGCATGCATTGTAAATCGTGTGT  
GTCAAACATCGAGAGTGCTTTATCTACACTCCAGTACGTAAGCAGCATAGCAGTTTTCTTTAGAGA  
ATAGGTCTGCCATTGTAAAGTACAATGCCAGCTCTATCACTCCAGAAGTACTGAGAAAAGCAAT  
AGAGTCTGTTTACCAGGGCAATATAAAGTTAGCATTGCAAGTGATGTTGAAAGTACCTCCAAC  
TCTC---

CCTCCTCCTCATCTCTTCAAAGGTTCTTTGAACATAGTTAGCCAGCCTCTGACTCAAGAAACC  
GTGATAAATATTAGTGAATGACTTGTAATCTTGTGTACAGTCTATAGAAGGTTTGATATCAA  
AAAGGCCAGGTGTAAATCTATA---  
CGAGTCTCCCTTGCAAATAGCACTGGGACTGTTGAGTATGATCCACTGCT-----

-----  
GCAGAGTGACTGTCCTTGGCCTGGACCTTGTGACTGTGAACTCTAATCAAGGC-----  
-----TCTTGTAGAAGGGACACTTGTGACCCTTACTT-AGAATCCAGTTTGGCTTAGTGTG--  
---TGAATTTGAGAATATTGTTCTGGGATTTGGAATGCAACATTAATCACA-TTAGCGGGCTTACT-  
CTGATTTGTGTGTTGATAGCATGCAA-A-----CATG-

TTTTGTCTGCCCTCTTGCTTCTACTTCTCCAGGGAAGCCGCCAAAGAGTGTGACGTAGGAAAA  
AAGAATATGTGAAATGTCTCGAGAGCCGAGTCGCAGTGCTGGAAGTCCAGAAC-  
AAGAAGCTTATAGAGGAACCTGGAGACC-----  
ATTTATATCATGTCTATTGTTTGCAAGAACAACAAAAAGTTACTTTCCACTGTACAGAGAAAG

ACTTAGTAGGAGATGTTCCCTGAAGGTACATACGGTCATTCCATTGATGTGGTGTATAGTCGAGG  
GAAAAGTATGGGTGTTCTCTTTGGAGGGCGGTCTACATGCCTTCTACCCAAAGAACCACAGAAA  
CATGGAATAGGGTAGCTGACTGCTTGCCCATGTTTTCTGGTAGATTTTGAATTTGCGTATGCT  
ACATCATACATACTTCCAGAACTTCAGGATGGGCTATCTTTTCATGTTTCCATTGCCAGAAGTGA  
TACCATTTACATTTTAGGAGGACACTCGCTTGCCAGTAATATCCGCCCTGCTAATCTGTACAGAA  
TAAGGGTTGATCTTCCCCTGGGTAGCCAGCTGTTACTTGCACAATTTTAGAGGAGCGTTGGGTG  
GGAGGCGGCAGTGAGGGAGACAGTAGCCACGGGG---ACGGGTCTGAGTTTGATGAT---  
GAAGGCATGCTGAGCGACGACCCCGATGGCACCTGGA---  
GTGAGCGAAGCCCCTCAGGATGAGCAATGCTGGTGTGAGGTCTAAAGAAGCTAAAGGAGACAA  
CGAACCGGCCAGCACTCTGGATTCCGATGACAGCCAATCTGTGCAGAATCCAGGCAGGAAGTTCT  
TCAGAAAGCCCCGATTTCTGGAGAAGATGACAGAGGTCACCTTGCTGACAGCAACACAAT---  
GGAAGTCCAGAGTACTCCACAGAAAACCTCAGGTCTCAGGAGGCTGGCCTGGGCCAATCCAGGG  
ACGAAAGTGACAGCGACTCTCAGGAGGACAGCACAGAGAGTCCGTCCAGGAAGACAGTTCCAA  
TGGACAAGACTCCAGCAGTGAGTCCAGC---GAAGAGGCTGACCGGCCAT

*Allactodipus bobrinskii*

CTCTTACCATTTTCGGCAACGCTCTGGTCATTCTGGCTGTGATGACCAGCCGCTCGCTACGCGCG  
CCACAGAACCTGTTTCTGGTGTGCTGGCTGCTGCGGACATCCTGGTGGCCACGCTTATCATTTCC  
TTTTTCTCTAGCCAACGAGCTGCTGGGCTACTGGTACTTCCGGCGCACTTGGTGGGAGGTCTACC  
TGGCGCTCGACGTGCTCTTCTGCACCTCGTCCATCGTGCACCTGTGTGCCATTAGTCTGGACCGGT  
ACTGGGCAGTGAGCCGCGCGCTAGAGTACAACCTCAAGCGCACCCCGCGCCGCATCAAATGCATC  
ATCCTCACCGTGTGGCTCATCGCAGCCATCATCTCGCTGCCGCCCTCATCTACAAGGGCGATCAG  
GGCCCCCAAACCCACGAGCGCCCCCAGTGCAAGCTCAACCAAGAGGCCTGGTACATCTTGGCCTC  
CAGCATCGGGTCTTTTTTTGACCCTGCCTCATCATG-ATCCTCGT-----  
TTCATGGACATGGAGTGCTTCATGATTCTGAACCCAGCCAGCAGCTGGCCATCGCTGTGCTGTC  
CCTCACACTGGGCACCTTCACAGTCCTGGAGAACCTGTTGGTGTGCTGTGTGCATCCTGCACTCCC  
GCAGCCTCCGCTGCCGGCCTTCTACCACTTCATTGGCAGCCTGGCAGTGGCTGACCTCCTGGGCA  
GCGTCATTTTTGTCTACAGCTTTGTGACTTCCATGTGTTCCACCGTAAAGATAGCCCCAATGTG  
TTTCTGTTCAAACCTGGGTGGGGTACGGCCTCCTTCACAGCCTCCGTAGGCAGCCTGTTCCCTCAC  
RGCCATCGACAGGTACATCTCTATTACAGGCCCTGGCCTATAAGAGGATCGTCACCAGACCCA  
AGGCTGTGGTGGCCTTTTGTCTGATGTGGACCATCGCAATTGTCATTGCTGTGCTCCCCCTCCTC  
GGATGGAAGTGCACCTGATGAAAAGACTGAAGGATCAGACACGGACAGACTTCTAAACAATGAC  
CA---  
TCAGAGATCACTTAACATCCTTGGGGCCAAGGATGATGATTCTGGGCGTACCAGCTGTTATGACC  
CTGACATTCTGGAAACTGATTTCCCATCCAGTGACATGTGTGATGGTGCCTCAGGGGTTGCTCAG  
CCACAGAGGTTAAAAGGGGAAGCTGATCTCTTGTGCCTTGATCAGAAAAATCAAATAACCTAC  
CTTA---TGATGCTTCTCCTG---CCACTCAGCAGCCAGCATTACCCTAAC---  
AGAGGAAGACAAACCACGGCCACTTCTTACTAGTGAAACAGAGCCAACCCACCAACTTGCTTCCA  
TGCAAATCAGCAATCCTAGTTCCCTGGCCAACATTGACTTTTATGCCCAAGTAAGTGACATTACA  
CCAGCAGGGAGTGTAGTCCTTTCTCCAGGCCAAAAGAATAAGGCAGGGATAACCCCATGCGACAT  
CATGC---  
ATCCAGAAGTGATCTCAGTCTGCCAAGACAATTACAACATGGACAATGCCTACTTCTGTGAGGCA  
GATGCCAAAAGTGCAAT-GCTGTGGCCCCCTCACATGGAAGTCAAATCACATGTAGAA---  
CCCAGCTTTAACCTATGAGCCCAGCAC---  
CCTGGAGACTGCCAGCAAGCCTCAGCATTCGCCAACCTCACCCACGATGAACTGCTGATCCAGC  
TGCAGAAGAATATTCACCATGAGGTCTTGAGGGCAACGTGGGTTATCTACGAGTGGATGACCTC  
CCGGGCCAGCAGGTACTGAGTGAACCTGGAGGGTTCTGGTGGCTCACGTGTGGAAGAAGCTCAT

GGGCACCTCCGCCTTGGTGCTGGATCTTCGCCACTGCACTAGAGGCCACGTCTCTGGCATCCCCTA  
TGTCGTCTCCTATCTGCACCCCGGAATACCGTCGTGCACGTGGACACCATCTATGATCGCCCCTC  
CAACACCACCACGGAGATCTGGACCTTGCCCAAGGTCCTGGGAGAGAGGTACAGTGCCGACAAGG  
ACGTGGTGGTTCTCACCAGCAGTCGCACAGGCGGTGTGGCTGAGGACATCGCCTACATCCTCAAG  
CAGATGCGCAGGGCCATTGTGGTGGGAGAGCGGACTGAGGGGGGCGCCCTGGACCTCCAGAA-----

-----  
ACGACTTCCCCCTGGATGTTTCCCTCCCGCCAGGTGTGGCCTGAGGACCATGTGTTTCAATTTCCACG  
CCAAGCTTCAACTACACAGGCCATGACTTTCAGCGCTTCTTTACGGACCTTCACTTTGAGGAAGG  
CTGGTACATGTGGCTACAGTCACGTGACCTGCTGGCAGGACTCCAGCACCTGGTGTAGAAGTAT  
ACTGTCTGTATGGCGTGGGTCTGCCCACACCTCGCACCTACATCTATGACCACAGCTTCCCCTACA  
AAGACCTGTGGATGCACTCTATGAGGACGGTGTATGACACAGTAGCCACACGCAGCATGGAGCTC  
TGTGGCCAGTGGCAGGGCCGCA-----

-----  
TTAGAAAGGTTCCAACAAACCAGATGGGCCAAAAGTAAGGAAGCATGTCATGATGGGCAGATTG  
CCAGCACCGAGAGGAAAGTGGGTGTGAGTGTGGTCCCCTCTCTGGGAGACTAGCATTGAATGAA  
CAGAAATCTCTGTGTGCCGAGACTCCTGCAGATAACGAAGATCTTGCTTGCTTAACCCGAAACAG  
CAGCATTCTGAAAGTGAACGAGTGGTTTTCTAGAAGTGTGAGTTGTTAACT-----  
GATACAAACAGCATGAGGGGTAAATCAAATGCTGAAGTAACTGGGGCATTAGAAGTTTTCAATA  
AAGTAAGCGGATATTCCTATTCTTCCAAGAAAATGGGTGTCCCAGACACTGATCCTTGTCTGCT  
TACTGTGTCAAAGTGAGACAGTCTGCTCCAAACC---

AGAGAGTAATATCAAAGATAAAAATATTTGGGAAAATCTATC---  
ATAAGAAGGCAGGCCCTTCCCAACTTGAACCATGTGACTGAAAATCTAATTCCAGGAGCATTGTGCT  
GCAGAACGACAAATAACACAAGAGCATTCTCT-----GGTG-----  
CACAGATGTCCCAATCAACCCTACCACCCCGTATGTAGAAGACACACCCGAGCCGCCCTGCATG  
ACTTCTACTGCAGTAAGCTGCTGGATCTGGTCTTCTCTGCTGGACGGCTCCTCCCAGCTGTCTGAG  
GCTGAGTTTGAAGTGTCAAGGCGTTTGTGGTAAGCATGATGGAGAGGCTGCACATCTCGCAGA  
AGCGCATCCGCGTGGCCGTCGTGGAGTACCACGATGGCTCCCACGCCTACATTGAGCTCAAGGCC  
CGCAAACGGCCCTCAGAGCTGCGACAGATTGCCAGCCACGTGAAGTACGCTGGCAGCCAGGTGGC  
CTCCACTAGCGAGGTCTTGAAGTACACCTGTTTCAAATATTTGGCAACATTGACCGGCCAGAAG  
CTTCCCGCATCACACTGCTCCTCACTGCCAGCCAGGAGCCCCACGGATGGTCAGGAACCTG-----  
--GTCCGCTACGTC-----

CAGGGCTTGGCTGTGGGCTTCCAAGCATTATCAAAAAACAGCCCAAGTACCTCAAGTTGGGAGC  
TATTGATGTGGAACGTCTAAAGAACACACCAGTCAAATCTCCAGAAGGGTCACATAAAAGGAGC  
CCTTCATCTACCAATGATTTAACGACCACTTTCATCGTTGATGGCATGCATTGTAAATCGTGTGT  
GTCAAACATTGAGAGTGCTTTATCTACACTCCAGTATGTAAGCCGCATAGCAGTTTCTTTAGAGA  
ATAGGTCTGCCATCGTAAAGTACAATGCCAGCTCTGCCACTCCAGAAACACTGAGAAAAGCAATA  
GAGTCCGTTTCACCAGGGCAATATAAAGTTAGCATTGCAAGTGTGTTGAAAGTACCTCCAACCTC  
TC---

CCTCCTCCTCATCTCTTCAAAGGTTCTTTGAACATAGTTAGCCAGCCTCTGACTCAAGAACT  
GTGATAAATATTAGTGAATGACTTGTAAATCTTGTGTACAGTCGATAGAGGGAATGATATCAA  
AAAGGCCAGGTGTAAAATCTATA---  
CGAGTCTCCCTTGCAAATAGCACTGGGACTGTTGAGTATGATCCACTGCT-----

-----  
GCAGAGTGACTGTCCTTGGCCTGGACCTTGTTGACTGTGAA--CTAATCAAGGC-----  
-----TCTTGTAGAAGGGACACTTGTGACCTTACTT-AGAATCCAGTTTGGCTTAGTGTG---  
---TGAATTGAGAATATTGTTCTGGGATTTGGAATGCAACATTAATCACA-TTAGCAGGCTTACT-

CTCATTGTGTGTTGATAGCATGCAA-A-----CATG-  
TTTTGTCTGCCCTCTTGCTTCTAATTTCTCCAGGGAAGCCGCCAAAGAATGTCGACGTAGGAAAA  
AAGAGTATGTCAAATGTCTGGAGAGCCGAGTCGCAGTGCTGGAAGTCCAGAAC-  
AAGAAGCTTATAGAGGAGCTGGAAACC-----  
ATTTATTTTCATATCTATCGTTTTGCGTGAACAACAAAACATATACTTTCCATTGTACAGAGAAAG  
ACTTGGTAG---ATGTTCCCAAAGATAGATATGGCCATTCCATTGATGTG---  
TGTAGTTGTGGGAAAAGTATGGATGTTCTCTTTGGAGACCAGTCTACATGCCTTTTTCCCAAAG  
AACTACAGAAACATGGGGTAGGGTAGCTGACTGCCTGCTCCGTGTTTTTCTGATGGATTTTGAAT  
TTGGGTGTGCTACATCATACATTATTCCAGAAC-----  
AGCTATCTTTTCATGTCTCTGTTGCCAGAAATGATACCATTACATTTTCAGGAGGACACTCACTT  
GTGAACAACATCCG?CCTGCCGATCTGTACAGAATAAGGGTTGATTGTCCCCTGGGTAGCCCAGC  
TGTGAGT-----GAGGAGCATTGGGTGGGAGGTGGCAGTGAGGGAGACAGTAGCCACGGGG---  
ATGGGTCTGAGTTTGTGATGAT---GAAGGAATGCTGAGTGACGACCCAGATGGCGCCAGGA---  
GTGAGCGAAGCCCCTCCAGGATGAGCAGTGCTAGTGTGAGGTCCAAAGAATCGAAAGGGGACAA  
TGAACCGGCCGGCCTCCTCATTGGGATGACAGCCAATCCGTGCAGAACCCAGGCAGGAAGTTST  
TCAGGAAGCCGCGCATCTCTGAGGAAGACGACAGAGGTCACCTTACTGACAGCAACACTAT---  
GGAAGTCCAGAGTGACTIONAACCGAACACTCCAAGTCTCAGGAAGCTGCTCTCAGCCAATCCAGGG  
AGGAAAGTGACAGCGACTCTCAGGAGGACAGCACAGAGAGTCCGTCCAGGAAGACAGTTCAA  
TGACAGGACTCCAGCAGTGAGTCCAGC---GAGGAAGTGGACCGGCCAT

*Allactaga\_bullata*

CTCTTACCATTTTCGGCAACGCGCTGGTCATTCTGGCTGTGATGACCAGCCGCTCGCTACGCGC  
ACCACAGAACCTGTTTCTGGTGTGCTGGCTGCTGCGGACATCCTGGTGGCCACGCTTATCATTC  
CTTTTTCTCTAGCCAACGAGCTGCTGGGCTACTGGTACTTCCGGCGCACTTGGTGCAGGTCTAC  
CTGGCGCTCGACGTGCTCTTCTGCACCTCGTCCATCGTGACCTGTGTGCCATCAGTCTGGACCGG  
TACTGGGCAGTGAGCCGCGCGCTAGAGTACAACCTCCAAGCGCACCCCGCGCCGCATCAAATGCAT  
CATCCTCACCGTGTGGCTCATCGCAGCCATCATCTCACTGCCGCCCTCATCTACAAGGGCGATCA  
GGGCCCCCAAACCACGAGCGCCCCCAATGCAAGCTCAACCAAGAGGCCTGGTACATCTTGGCCT  
CCAGCATCGGGTCTTTTTTGCACCCTGCCTCATCATG-ATCCTCGT-----  
TTCATGGACATGGAGTGCTTCATGATTCTGAACCCAGCCAGCAGCTGGCCATCGCTGTGCTGTC  
CCTCACACTGGGCACCTTACAGTCTGGAGAACCTGCTGGTGTGTGTGTCATCTGCACTCAC  
GCAGCCTCCGCTGCCGGCCTTCCCTACCCTTCACTTGGCAGCCTGGCAGTGGCTGACCTCCTGGGCA  
GYGTCATTTTTGTCTACAGCTTTGTCGACTTCCATGTGTTCCACCGTAAAGATAGCCCCAATGTG  
TTTTCTGTTCAAGCTGGGCGGGGTCACRGCCTCCTTACAGCCTCCGTAGGCAGCCTGTTCTCAC  
GGCCATCGACAGGTACATATCCATTACAGGCCCTGGCCTATAAGAGGATCGTCACCAGGCCCA  
AGGCCGTGGTGGCCTTTTGTCTGATGTGGACCATCGCAATTGTCATTGCTGTGCTGCCCTCCTC  
GGATGGAAGTGCACCTGATGAAAAGACTGAAGGATCAGATACGGACAGACTTCTAAACAATGAC  
CA---  
TCAGAGATCACTTAACATCCTTGGGGCCAAGGATGATGATTCTGGGCGTACCAGCTGTTATGACC  
CTGACATTCTGGAAACTGATTTCCCATCCAGTGACATGTGTGATGGTGCCTCAGGGGTGCTCAG  
CCACAGAGGTTAAAAGGGGAAGCTGATCTTGTGCCTTGATCAGAAAAATCAAATAACCTAC  
CTTA---TGATGCTTCTCCTG---CCACTCAGCAGCCAGCATTACCCTAAC---  
AGAGGAAGACAAACCACGGCCACTTCTTACTAGTGAAACAGAGTCAACCCACCAACTTGCTTCCA  
TGCAAATCAGCAATCCTAGTTCCCTGGCCAACATTGACTTTTATGCCAAGTAAGTGACATTACA  
CCAGCAGGGAGTGTAGTCTTTCTCCAGGCCAAAAGAGTAAGGCAGGGATACCCCATGCGACAT  
CATGC---  
ATCCAGAAGTGTCTCAGTCTGCCAAGACAATTACAACATGGACAATGCGTACTTCTGTGAGGTA



GATGCCAAAAAGTGCATT-GCTGTGGCCCCTCACATGGAAGTCAAATCACATGTAGAA---  
CCCAGCTTTAACCTATGAGCCCAGCAC---  
CCTTGAGACTGCCAGCAAGCCTCAGCATTCGCCAACCTCACCCACGATGAACTGCTGATCCAGC  
TGCAGAAGAATATTCACCATGACGTCTTGAGGGCAACGTGGGTTATCTACGAGTGGATGACCTC  
CCGGGCCAGGAGGTACTGAGTGAACCTGGGGCATTCTGGTGGCTCACGTGTGGAAGAAGCTCAT  
GGGCACCTCCGCCTTGGTGTGGATCTTCGCCACTGCACTAGAGGCCACGTCTCTGGCATCCCCTA  
TGTCGTCTCCTATCTGCACCCCGGAATACCGTTCGTGCACGTGGACACCATCTATGATCGCCCCTC  
CAACACCACCACGGAGATCTGGACCTTGCCCAAGGTCCTGGGAGAGAGGTACAGTGTGACAAGG  
ACGTGGTGGTTCTCACCAGTAGTCGCACAGGGGGGTAGCYGAGGACATCGCCTACATCCTCAAG  
CAGATGCGCAGGGCCATCGTGGTGGGGAGCGGACGGAGGGGGGCGCCCTGGATCTCCAGAA-----

-----  
ACGACTTCCCCCTGGATGTTTCTTCCCCGCCAGGTGTGGCCTGAGGACCATGTGTTTCAATTTCCAC  
GCCAAGCTTCAACTACACAGGCCATGACTTTCAGCGCTTCTTTACGGACCTTCACTTTGAGGAAG  
GCTGGTACATGTGGCTACAGTCACGTGACCTGCTGGCAGGCCTCCAGCACCTGGTGTAGAAGTA  
TACTGTCTGTATGGCGTGGGTCTGCCACACCTCGCACCTACATCTATGACCACAGCTTCCCCTAC  
AAGGACCCTGTGGCTGCACTCTATGAGGACGGTGTGACACAGTAGCCACACGCAGCATGGAGCT  
CTGTGGCCAGTGGCAGGGCCGCCA-----

-----  
CTAGAAAGTTCCAACAAAGCAGATGGACCAAAGTAAGGAAGCATGTCATGATGGGCAGATTG  
CCAGCACCGAGAGGAAAGTGGGTCTGAGTGTGGTCCCCTTTCTGGGAGACTAGCATTGAATGA  
ACAGAAATCTCTATGTGCCGAGACTCCTGCAGATAACGAAGATCTTGCTTGCTTAACCCGAAACA  
GCAGCATTCTGAAAGTGAACGAGTGGCTTTCCAGAAGTGATGAGTTGTTAACT-----  
GATACAAACAACATGAGGGGTAAATCAAATGCTGAAGTAACTGGGGCATTAGAAGTTTTCAATA  
AAGTAAGCGGAAATTCCTATTCTTCCAAGAAAATGGGTGTATCAGACACTGATCCTTGTCTCTGT  
TTACTGTGTCAAAGTGAGACAGTCTGCTCCAAACC---

AGAGAGTAATATCAAAGATAAAATATTTGGGAAAATCTATC---  
ATAAGAAGGCAGGCCTCCCCAACTTGAACCATGTGACTGAAAATCTAATTCCAGGAGCATTGTCT  
ACAGAACGACAAATAACACAAGAGCATTCTCT-----GGTG-----  
CACAGATGTCCCAGTCAGCCCTACCACCCCGTATATAGAAGACACACCCGAGCCGCCCTGCACG  
ACTTCTACTGCAGTAAGCTGCTGGATCTGGTCTTCTCTGCTGGACGGCTCCTCCCAGCTGTCTGAG  
GCTGAGTTTGAAGTGTCAAGGCGTTTGTGGTCAGCACCATGGAGAGGCTGCACATCTCGCAGAA  
GCGCATCCGCGTGGCCGTCTGGAGTATCACGATGGTTCCCACGCCTACATCGAGCTCAAGACCC  
GGAAACGGCCCTCAGAGCTGCGACACATTGCCAGCCACGTGAAGTACGCTGGCAGCCAGGTGGCC  
TCCACCAGCGAGGTGTTGAAGTACACCCTGTTTCAAATATTCGGCAACATTGATCGGCCGGAAGC  
TTCCCGCATCACGCTGCTCCTCACCGCCAGCCAGGAGCCCCCGGGATGGTCAGGAACCTG-----  
GTCCGCTACGTC-----

CAGGGCTTGGCTGTGGGCTTCCAAGCATTATCAAAAAACAGCCCAAGTACCTCAAGTTGGGAGC  
TATTGATGTGGAACGTCTAAAGAACACACCAGTCAAATCTCCAGAAGGGTCACATAAAAGGAGC  
CCTTCATGTACCAATGATTTAACGACCACTTTCATCGTTGATGGCATGCATTGTAAATCGTGTGT  
GTCAAACATTGAGAGTGCTTTATCTACACTCCAGTATGTAAGCCACATAGCAGTTTCTTTAGAGA  
ATAGGTCTGCCATCGTAAAGTACAATGCCAGCTCTGCCACTCCAGAAACACTAAGAAAAGCAATA  
GAGTCTGTTTCACCAGGGCAATATAAAGTTAGCATTGCAAGTGATGTTGAAAGTACCTCCAATC  
TC---

CCTCCTCCTCATCTCTTACAAGGTTCTTTGAACATAGTTAGCCAGCCTCTGACTCAAGAACT  
GTGATAAATATTAGTGAATGACTTGTAATCTTGTGTACAGTCGATAGAGGGAATGATATCAA  
AAAGGCCAGGTGTAATAATCTATA---

CGAGTCTCCCTTGCAAATAGCACTGGGACTGTTGAATATGATCCACTGCT-----  
-----  
GCAGAGTGACTGTCCTTGGCCTGGACCTTGTGACTGTGAA--CTAACCAAGGC-----  
-----TCTTGTAGAAGGGACACGCGTGGTCTTACTT-AGAACCCAGTTTGGCTTAGTGTG---  
---TGAATTGAGAATATTGTTCTGGGATTTGGAATGCAACATTAATCACA-TTAGCAGGCTTACT-  
CTAATTTGTGTGTTGATAGCATGCAA-A-----CATG-  
TTTTGTCTGCCCTTCTGCTTCTACTTTCTCCAGGGAAGCCGCCAAAGAATGTCGACGTAGGAAAA  
AAGAGTATGTCAAATGTCTGGAGAGCCGAGTCGCAGTGCTGGAAGTCCAGAAC-  
AAGAAGCTTATAGAGGAGCTGGAAACC-----  
ATTTATTTTCATATCTATCGTTTGCATGAACAACAAAACATATACTTTCCATTGTACAGAGAAAG  
ACTTGGTAG---  
ATGTTCCCAAAGATAGATATGGCCATTCCATTGATGTGGTGTATAGTTGTGGGAAAAGTATGGA  
TGTTCTCTTTGGAGACCAGTCTACATGCCTTCTCCCAAAGAACCACAGAAACATGGGGTAGGG  
TAGCTGACTGCCTGCTCCGTGTTTTTCTGGTGGATTTTGAATTTGGGTGTGCTACATCATACTT  
CTTCCAGAAC-----  
AGCTATCTTTTCATGTCTCTGTTGCCAGAAATGATACCATTACATTTTCAGGAGGACACTCACTT  
GTG---  
AATATCCA?CCTGCCGATCTGTACAGAATAGGGGTTGATCGTCCCCTGGGTAGCCCAGCTGTGAG  
TTGCACAATCTTAGAGGAGCAGTGGGTGGGAGGTGGCAGTGAGGGTGACAGTAGCCACGGGG---  
ACGGGTCTGAGTTTGATGAT---GAAGGAATGCTGAGTGATGACCCAG---GCGCCAGGA---  
GCGAGCGAAGTCCCTCCAGGATGAGCAGTGCTGGTGTGAGGTCAAAGAATCGAAAGGGGACAA  
TGAGCCTGCCGGCACTCCTCATTGGGATGACAGCCAATCCGTGCAGAACCCAGGCAGGAAGTTCT  
TCAGGAAGCCCCGCATCTCTGAGGAAGATGACAGAGGTCACCTTGTGACAGCAACACTAT---  
GGAAGTCCAGAGTGACTCCACCGAACACTCCAAGTCTCAGGAAGCTGCTCTCAGCCAATCTAGGG  
AGGAAAGCGACAGCGACTCTCAGGAGGATAGCACAGAGAGTCCGTCCCAGGAAGACAGTTCAA  
TGGACAGGACTCCAGCAGTGAGTCCAGC---GAGGAAGTGGACAGGCCAT

Stylodipus\_andrewsi

CTCTTACCATTTTCGGCAACGCGTTGGTCATTCTGGCAGTGTTGACCAGCCGCTCGCTACGCGC  
ACCACAGAACCTGTTTCTGGTGTGCTGGCTGCGGCGGACATCCTGGTGGCCACGCTTATCATTC  
CTTTTTCTCTAGCCAACGAGCTGCTGGGCTACTGGTACTTCCGGCGCACCTGGTGGGAGGTCTAC  
CTGGCGCTCGACGTGCTCTTCTGCACCTCGTCCATCGTGCACCTGTGCGCCATCAGCCTGGACCGG  
TACTGGGCAGTGAGCCGCGCGCTGGAGTACAACCTCCAAGCGCACCCCGCGCCGCATCAAATGCAT  
CATCCTCACCGTGTGGCTCATCGCAGCCATCATCTCGCTGCCGCCCTCATCTACAAGGGCGACCA  
GGGCCCCCAAACCCACGAGCGCCCCCAATGCAAGCTCAACCAAGAGGCCTGGTACATCTTGGCCT  
CCAGCATCGGGTCTTTTTTTGCACCCTGCCTCATCATG-ATCCTCGT-----  
TTCATGGACATGGAGTGTTCATGATTCTGAACCCAGCCAGCAGTTGGCCATTGCTGTGCTGTC  
CCTCACACTGGGCACCTTACAGTCCTGGAGAACCTTCTGGTGTGCTGTGTGTCATCCTGCATTAC  
GCAGCCTCCGCTGCCGGCCTTCTTACCCTTCAATTGGCAGCCTGGCAGTGGCTGACCTCCTGGGCA  
GCGTCATTTTTGTCTACAGCTTTGTGACTTCCATGTGTTCCACCGTAAGGATAGCCCCAATGTG  
TTTCTGTTCAAACCTGGGTGGGGTACGGCCTCCTTACGGCCTCCGTAGGCAGCCTGTTCTCAC  
GGCCATCGACAGGTACATATCTATTCACAGGCCCTGGCCTATAAGAGGATCGTACCAGGCCCA  
AGGCCGTGGTGGCCTTTTGCCTGATGTGGACCATCGCAATTGTCATTGCTGTGCTGCCCTCCTC  
GGCTGGAAGTGCACCTGATGAAAAGACTGAAGGCTCAGACACGGACAGACTTCTCAACAATGACC  
A---  
TCAGAGATCACTTAACATCCTTGGGGCCAAGGATGATGATTCTGGGCGTACCAGCTGTTATGACC  
CTGACATTCTGGAAACTGATTTCCAGCCAGTGACATGTGTGATGGTGCCTCAGGGGTTGCTCAG

CCACAGAGGTTAAAAGGGGAAGCTGATCTCTTGTGCCTTGATCAGAAAAATCAAATAACCTAC  
CTTA---TGATGCTTCTCCTG---CCACTCAGCAGCCCAGCACTACCCTAAC---  
AGAGGAAGACAAACCACAACCCTTCTTACTAGTGAAACAGAGTCAACCCACCAACTTGCCTCCA  
TGCAGATCAGCAATCCTAGTTCCCTGGCCAACATCGACTTTTATGCCCAAGTAAGTGACATTACA  
CCAGCAGGGAGTGTAGTCCTTTCCCCAGGCCAAAAGAGCAAGGCAGGGATACCCCATGCAACAT  
CATGC---  
ATCCAGAAGTGATCTCAGTCTGCCAAGCCAATTACAACCTGGACAGTGCCTACTTCTGTGAGGCA  
GATGCCAAAAAGTGCATT-GCTGTGGCCCTCACATGGAAGCCAAGTCACATGTAGAG---  
CCCAGCTTTAACCTATGAGCCCAGCAC---  
CCTTGAGACGTCCCAGCAAACCTCAGCATTACCAACCTCACCCACGATGAACTGCTGCTCCAGG  
TGCAGAAGAACATTTCGCCATGAGGTCTGGAGGGCAACGTGGGTATCTACGAGTGGATGACCTC  
CCAGGCCAGGAGTACTGAGTGAACCTGGGGAGTTCCTGGTGGCTCACGTGTGGAGGAAGCTCAT  
GGGCACTTCTGCCTTGGTACTGGATCTTCGCCACTGCACGGGGGGCCACGTCTCTGGCATCCCCT  
ATGTCATCTCCTATCTGCATCCCGGAATACCGTCGTGCACGTGGACACCATCTACGACCGCCCCT  
CCAACACCACCACGGAGATCTGGACCTTGCCCAAGTCTGGGAGAGAGGTACAGCGCTGACAAG  
GACGTGGTGGTACTCACCAGCAGTCGCACGGGGGGCGTGGCCGAGGACATCGCTACATCCTCAA  
GCAGATGCGCAGGGCCATCGTGGTGGGCGAGCGCACGGAGGGGGTGCCTGGAT?TGCAGAA----  
-----  
ACGACTTCCCCCTGGATGTTTCCCTCCCGCCAGGTGTGGCCTGAGGACCATGTGTTCAATTTCCAGC  
CCAAGCTTCAACTACACAGGCCATGACTTTCAGCGCTTCTTTACGGACCTTCACTTTGAGGAAGG  
CTGGTACATGTGGCTACAGTCACGTGACCTGCTGGCAGGGCTCCCGGCACCTGGCGTAGAAGTAT  
ACTGTCTGTATGGCGTGGGCCTGCCACACCCCGCACCTACATCTATGACCACAGCTTCCCCTACA  
AAGACCTGTGGCTGCGCTCTATGAGGACGGTGTATGACACAGTAGCCACACGCAGCATGGAGCTC  
TGTGGCCAGTGGCAGGGCCGCCA-----  
-----  
CTAGAAAGGATCCAACCAAGCAGATGGACCAAAGCAAGGAAGCATGTCACGATGGGCAGATCG  
CCAGCCCCGAGAAGAAGGTGGGGCTGAGTGTGCTGGTCCCCTCTCTGGGAGACAAACATTGAATGAG  
CAGAAACCTGTGTGCTCCGAGAATCCTGCAGGTAATGAAGTCTGCTTGGGTAACCCGAAACAG  
CAGCATTCTGAAGGTGAATGAGTGGTTTTCCAGAAGTGGTGAAGTTGTTAACTTTTTGCTGATA  
GACAGCGTGAGGGGTGAATCAAATGCCGAAGTAGCTGGGGCTGYACAAGTTGTTGGTGAAGTAA  
GYGGGTATTCTGCTCTTCCAAGAGAACGGGCGTCCCGGACACAGATCCTTGTCTGCTGTACTA  
TGTCAAAGTGAGACCGTCTGCTCAAACC---  
AGAGAGTAATATCAAAGATAAAATATTTGGGAAAACCTATC---  
ATAAGAAGGCAGGCCTCACCAACTTGAACCATGTGACTGAAAATCTAATTCCAGGAGCATTGCT  
GCAGAACCACAAATAACACAAGAGCATCCCT-----GGTG-----  
CACAGATGCCCCGCTCAGTCAACCACGCCCTATGTGGAGGACACCCCCGAGCCACCCCTGCACGA  
CTTCCACTGCAGCAAGCTGCTGGATCTGGTCTTCTGCTGGACGGCTCCTCCAGGCTGTCCGAGG  
CCGAGTTTGAGGTGCTCAAGGCCTTCGTGGTGAAGCGGATGGAGAGRCTGCACATCTCCAGAAG  
CGCATCCGCGTGGCCGTGGTCCGAGTACCACGACGGCTCCACGCCTACATCGAGCTCAGGGCCCG  
GAAGCGGCCCTCGGAGCTGCGCCACCTTGCCGGCCAGGTGAAGTATGTGGGCAGCCAGGTGGCCT  
CCACGAGTGAGGTCTTGAAGTACACCCTCTTCCAGATCTTTGGCAAGGTGACCCGCCAGAAGCG  
TCCCGCTGCGCTGCTCCTCACCGCCAGCCAGGAGCCCCACGCATGGCCCCGAACCTG-----  
GTCCGTTACGTC-----  
CAGGGCTTGGCTGTGGGTTTTCCAGGCATTTATCAAAAAACAACCCAAGTACCTCAAGTTGGGAGC  
TATTGATGTGGAGCGTCTAAAGAACACACCAGTCAAATCTCCAGAAGGGTCACAGAAAAGGAGT  
CCCTCATTTACCAATGATTTAACGGCCACTTTCATCGTTGATGGCATGCATTGTAAATCGTGTGT

GTCAAACATCGAGAGTGCTTTATCTACACTCCAGTACGTAAGCAGCATAGCAGTTTCTTTAGAGA  
ATAGGTCTGCCATTGTAAAGTACAATGCCAGCTCTGCCACTCCAGAAGCACTGAGAAAAGCAATA  
GAGTCTGTTTCACCAGGGCAATATAAAGTTAGCATTGCAAGTGATGTTGAAAGTACCTCCAAC  
TC---  
CCTCCTCCTCATCTCTTCAAAGGTTCTTTGAAACATAGTTAGCCAGCCTCTGACTCAAGAACT  
GTGATAAATATTAGTGAATGACTTGTAATCTTGTGTACAGTCTATAGAAGGTTGATATCAA  
AAAGGCCAGGTGTAATAATCTATA---  
CGAGTCTCCCTTGCAAATAGCACTGGGACTGTTGAGTATGATCCACTGCT-----  
-----  
GCAGAGTGACTGTCCTTGGCCTGGACCTTGTGACTGTGAACTCTAATCAAGGC-----  
-----TCTTGTAGAAGGGACACTTGTGACCCTTACTT-AGAATCCAGTTTGGCTTAGTGTG--  
---TGAATTGAGAATATTGTTCTGGGATTTGGAATGCAACATTAATCACA-TTAGCGGGCTTACT-  
CTAATTTGTGTGTTGATAGCATGCAA-A-----CATG-  
TTTTGTCTGCCCTCTTGCTTCTACTTTCTCCAGGGAAGCCGCCAAAGAGTGTGACGTAGGAAAA  
AAGAATATGTCAAATGTCTCGAGAGCCGAGTCGCAGTGCTGGAAGTCCAGAAC-  
AAGAAGCTTATAGAGGAACTGGAAACC-----  
ATTTATATCATGTCTATTGTTTGAAGAACAACAAAAARTTACTTTCCACTGTACAGAGAAAG  
ACTTAGTAGGAGATGTTCTGAAGGTAGATACGGTCATTCCATTGATGTGGTGTATAGTGCAGG  
GAAAAGTATGGGTGTTCTCTTTGGAGGGCGGTCTACATGCCCTTCTACCCAAAGAACCACAGAAA  
CATGGAATAGGGTAGCTGACTGCTTGCCCATGTTTTCTGGTAGATTTTGAATTTGCGTGTGCT  
ACATCATACTACTTCCAGAACTTCCAGGATGGGCTATCTTTTCATGTCTCCATTGCCAGAAATGA  
TACCATTTACATTTTAGGAGGACACTCGCTTGCCAGTAATAGCCGCCCTGCCAATCTGTACAGAA  
TAAGGGTTGATCTTCCCCTGGGTAGCCAGCTGTGAGTTGCACAATTTTA-----  
-----TTGAGCGACGACCCAGATGGCACCTGGA--  
GTGAGCGGAGCCCCTCCAGGATGAGCAGTGCTGGTGTGAGGCCTAAAGAAGCCAAAGGGGACCAC  
GAGCCGGCCAGCACTCCGGATTCGGATGACAGCCAATCCGTGCAGAATCCAGGCAGGAAGTTCTT  
CAGAAAGCCGCGCATTCTGTTGGGAAGATGACAGAGGTCACCTTGCTGACGGCCACACAAT---  
GGAAGTCCAGAGTGACTCCACAGAAAACCTCCAAGTCTCAGGAGGCTGGTCTCGGCCGGTCCAGGG  
AGGACAGTGACAGCGACTCTCAGGAGGACAGCACAGAGAGCCCGTCCAGGAAGACAATTTCCAAT  
GGACAAGACTCCAGCAGCGAGTCCAGC---GAAGAGGCTGACCGGCCAT

*Euchoreutes\_naso*

CTCTTCACCATTTTCGGCAACGCGCTGGTCATTCTGGCTGTGTTGACCAGCCGCTCGCTACGCGCA  
CCACAGAACCTGTTTCTGGTGTGCTGGCTGCGGGCGGACATCCTGGTGGCCACGCTTATCATTCC  
TTTTTCTCTAGCCAACGAGCTGCTGGGCTACTGGTACTTCCGGCGCACTTGGTGCAGGCTACC  
TGGCGCTCGACGTGCTCTTCTGCACCTCGTCCATCGTGCACCTGTGCGCCATCAGTCTGGATCGGT  
ACTGGGCACTGAGCCGCGCTCTGGAGTACAACCTCCAAGCGCACCCCGCGCCGATCAAATGCATC  
ATCCTCACCGTGTGGCTCATCGCAGCCATCATCTCGCTGCCGCCCTCATCTACAAGGGCGACCAG  
GGCCCCAAACCCACGAGCGCCCCAATGCAAGCTCAACCAAGAGGCCTGGTACATCTTGGCCTC  
CAGCATCGGGTCTTTTTTTGCACCCTGCCTCATCATG-ATCCTCGT-----  
TTCATGGACATGGAGTGCTTCATGATTCTGAACCCAGCCAGCAGCTGGCCATCGCTGTGCTGTC  
CCTCACATTGGGCACCTTCACTGTCTGGAGAACCTGCTGGTGTGTTGTCATCCTGCACTCAC  
GCAGCCTCCGCTGCCGGCCTTCCCTACCACTTCATTGGCAGCCTGGCAGTGGCTGACCTCCTGGGCA  
GCGTCATTTTTGTCTACAGCTTCGTCGACTTCCATGTGTTCCACCGTAAAGATAGCCCCAATGTG  
TTTCTGTTCAAACCTGGGCGGGGTCACAGCCTCCTTACGGCCTCCGTAGGCAGCCTGTTCTCAC  
AGCCATCGACAGGTACATATCTATTCACAGGCCTCTGGCCTATAAGAGGATCGTACCAGGCCCA  
AGGCTGTAGTGGCCTTTTGCCTGATGTGGACCATCGCAATTGTCATCGCTGTGCTGCCCTTCTC

GGCTGGAACTGCACCTGATGAAAAGACTGAAGGATCAGACACGGACAGACTTCTAAACAATGAC  
AA---  
TCAGAGATCACTTAACATCCTTGGGGCCAAGGATGATGATTCGGGGCGTACCAGCTGTTATGACC  
CTGACATTCTGGAAACTGATTTCCCAGCCAGTGACATGTGTGATGGTGCCTCAGGGGTTGCTCAG  
CCACAGAGGTTAAAAGGGGAAGCTGATCTCTTGTGCCTTGATCAGAAAAATCAAATAACCTAC  
CTTA---TGATGCTTCTCCTG---CCACTCAGCAGCCAGCATTACCCTAAC---  
AGAGGAAGACAAACCACGACCACTTCTTACTAGTGAAACAGAGTCAAACCACCAACTTGCCTCCA  
TGCAGATCAGCAATCCTAGTTCCTAGCCAACATCGACTTTTATGCCAAGTAAGTGACATTACA  
CCAGCAGGCAGTGTAGTCCTTTCCCAGGCCAAAAGAATAAGGCAGGGATAGCCCCATGCGACAT  
CATGC---  
ATCCAGAAGTGATCTCAGTCTGCCAAGCCAATTATAACATGGACAATGCCTACTTCTGTGAGGCA  
GATGCCAAAAGTGCATT-GCCGTGGCCCCTCACATGGAAGTCAAATCACATGTAGAG---  
CCCAGCTTTAACCTATGAGCCCAGCAC---  
CCTGGAGACTTCCCAGCAAGCCTCAGCATTATCAACCTTACCCACGATGAACTGCTGGTCCAGC  
TGCAGAAGACCATTACCACGAAGTCCCTGGAAGGCAACGTGGGTTATCTACGAGTGGATGACCTC  
CCGGGCCAGGAGTACTGAGTGAACCTTGGGGGGTACCTGGTGGCTCAGTGTGGAAGAAGCTCAT  
GGGCACCTCGGCCTTGGTGTGGACCTTCGTCACTGCACTGGAGGCCACGTTTCTGGTATCCCCT  
ATGTCATCTCCTATTTGCACCCCGGAATACCGTCGTGCATGTGGACACCATCTATGATCGCCCC  
TCCAACACCACCGGAGATCTGGACCTTGCCAAGGTCCTGGGAGAGAGGTACAGTGTGACAA  
GGATGTGGTGGTCCCTACCAGCACTCGCACAGGAGGTGTGGCTGAGGACATCGCCTACATCCTCA  
AGCAGATGCGCAGGGCCATTGTGGTGGGTGAGCGGACTGAGGGGGGCGCCCTGGATCTCCAGAA-  
-----  
ACGACTTCCCCCTGGATGTTTTCCCTCCCGCCAGGTGTGGCCTGAGGACCATGTGTTTCAATTTCCAC  
ACCAAGCTTCAACTACACAGGCCATGACTTTCAGCGCTTCTTTACGGACCTTCACTTTGAGGAAG  
GCTGGTACATGTGGCTACAGTCACGTGACCTGCTGGCAGGACTCCCAGCACCTGGTGTAGAAGTA  
TACTGTCTGTATGGCGTGGGTCTGCCACACCCTGCACCTACATTTACGACCACAGCTTCCCCTAC  
AAGGACCCTGTGGCTGCGCTCTATGAGGACGGTGATGACACAGTAGCCACACGCAGCATGGAGCT  
CTGTGGCCAGTGGCAGGGCCGCCA-----  
-----  
CTAGAAAGGATCCAACCAAGCAGATGGGCCAAAAGTAAGGAAGCATGTCATGATGAGCAGATTG  
CCAGTACCAAGAGGAAGGTGGGTCCGAGTGCTGGTCCCCTCTCTGGGAGACAAGCATTGAATGAA  
CAGAAACCTCTGTGCCCGAGACTCCTGCAGATAACGAAGTCTTGCTTGGTTAACCCGAAACAG  
CAGCATTCTGAAAGTGAATGAGTGGTTTTCCAGAAGTGATGAGTTGTTAACTTATGCTGATACA  
GACAACATGAGGGGTGAATCAAATGCTGAAGTAGCTGGGGCAGTAGAAGTTTTCAATGAAGTAA  
GTGGATATTCCTGTTCTTCCAAGAAAACGGGCATCCTGGACACTGATCCTTGTCTGCTTTACTA  
TGTCAAAGTGAGACAGTCTGCTCCAAACC---  
AGAGAGTAATATCAAAGATAAAATATTTGGGAAAACCTATC---  
ATAAGAAGGCAGGCCTCCCCAACTTGAACCATGTGACTGAAAATCTAATTCAGGAGCATTTTCT  
GCAGAACCACAAATAACCCAAGATCATCCCT-----GGTG-----  
CACAGATGTCCCGCTCATCCCTACCACCCCGTATGTAGAAGGCACGCCTGAGCCACCCCTGCACGA  
CTTCTACTGCAGCAAGCTGCTGGACCTGATCTTCCCTACTGGATGGCTCCTCCAAGCTGTCCGAGG  
CTGAGTTTGAAGTACTCAAGGCCTTCGTGGTAAGCATGATGGAGAGGCTGCACATCTCACAGAA  
GCGCATTGCGGTGGCCGTGGTGGAGTACCATGATGGCTCCCATGCCTACATCGAGCTCAAGACCC  
GGAAGCGGCCCTCAGAGCTGCGACACATTGCCAGCCAGGTGAAGTATGCTGGCAGCCAGGTGGCC  
TCCACTAGTGAGGTCTTGAAGTACACACTGTTTCAAATCTTTGGCAAAGTTGACCGGCCAGAAGC  
CTCCCGCATCACACTGCTCCTCACAGCCAGCCAGGAACCCCCACGGATGACCCGGAACCTG-----

GTCCGCTACGTC-----  
CAGGGCTTGGCTGTGGGCTTCCAGGCATTTATCAAAAAACAGCCCAAGTACCTCAAGTTGGGAGC  
TATTGATGTGGAGCGTCTAAGAACACACCAGTCAAATCTCCAGAAGGATCATGGAAAAGGAGT  
CCCTCATCTACCAGTGATTTAACGGCCACTTTCATCATTGATGGCATGCATTGTAAATCGTGTGT  
GTCAAACATTGAGAGTGCTTTATCTACACTCCAGTATGTAAGCAGCATAGCAGTTTCTTTAGAG  
AATAGGTCTGCCATCGTAAAGTACAATGCCAGCTCTGCCACTCCAGAAACACTGAGAAAAGCAAT  
AGAATCTGTGTCACCAGGGCAATATAAAGTTAGCATTGCAAGTGATGTTGAAAGTACCTCCAAC  
TCTC---  
CCTCCTCCTCATCTCTTCAAAAGGTTCTTTGAACATAGTTAGCCAGCCTCTGACTCAAGAAACC  
GTGATAAATATTAGTGGAAATGACTTGTAATCTTGTGTACAATCTATAGAGGGTTTGATATCAA  
AAAGGCCAGGTGTAATAATCTATA---  
CGAGTCTCCCTTGCAAATAGCACTGGGACTGTTGAGTATGATCCACTGCT-----  
-----  
GCAGAGTGACTGTCCATGGCCTGGACCTTGTGACTGTGAACTCTAATCAAGGC-----  
-----TCTTGTAGAAGGGACACTTGTGACCCTT----AGAATCCAGTTTGGCTTAGTGTG----  
-TGAATTGAGAATATTGTTCTGGGATTTGGAATGCAGCATTAAATCACA-TTAGCAGGCTTACT-  
CTAATTGGTGTGTCGGTAGCATGCAA-A-----CATG-TCTTGTCTGCC---  
TTGCTTCTGCTTTCTCCAGGGAAGCCGCCAAAGAATGTCGACGTAGGAAAAAAGAGTATGTCAA  
ATGCCTCGAGAGTCGAGTCGCGGTGCTGGAAGTCCAGAAC-  
AAGAAGCTTATAGAGGAACTGGAAACC-----  
ATTTATATCATGTCTATTGTTTGAAGAACAACAAAAAAGTTACTTTCCACTGCACAGAGAAAG  
ACTTAGTAGGAGATGTTTCTGAAGGTAGATATGGTCATTCCATTGATGTGGTGTACAGTCGAGG  
GAAAAGTATGGGTGTTGTCTTTGGAGGGCGGTCTACATGCCTTCTACCCAAAGAACCACAGAAG  
CATGGAATAGAGTAGCTGACTGCCTGCCCATGTTTTCTGGTGGATTTTGAATTTGGGTATGCT  
ACATCATACATCCTTCCAGAACTTCAGGACGGGCTATCTTTTCATGTCTCTATTGCCAGAAATGA  
TACCATTTACATTTTAGGAGGACACTCGCTTGCCAGTAATATCCGCCCTGCTAATCTGTACAGAA  
TAAGGGTTGATCTTCCCCTGGGTAGCCAGCTGTGAGTTGCACAATTTTAGAGGAGAATTTGGGT  
GGGAGGTGGCAGTGAGGGAGACAGTAGCCACGGGG---ACGGGTCTGAGTTTGATGAT---  
GAAGGAATGCTGAGTGATGACCCAGATGGCACCAGGA---  
GTGAGCGAAGCCACTCCAGGATGAGCAGTGCTGGCGTCAGGTCCAAAGAATCTAAAGGGGACAA  
TGAACCGGCCAGCGCTCCGGATTCAGATGACAGCCAATCAGTGCGCAACCCAGGCAGGAAGTTCT  
TCAGAAAGGGCCGCATCTCTGAGGAAGATGACAGAGGTCACCTTGCTGACAGCAACACTAT---  
GGAAGTCCAGAGTACTCCACAGAAAACCTCAAGTCTCAGGAAGCTGGTCTCAGCCAATCCAGGG  
AGGAAAGTGACAGCGACTCTCAGGAGGACAGCACAGACAGTCCATCCAGGAAGACAGCTCAAA  
TGGACAAGACTCCAGCAG?????????--?????????????????

Jaculus\_jaculus

CTCTTCACCATTTTCGGCAACGCGTTGGTCATTCTGGCAGTGTTGACCAGCCGCTCGCTACGCGC  
ACCACAGAACCTGTTTCTGGTGTCTCTGGCTGCGGCTGACATCCTGGTGGCCACGCTTATCATTC  
CTTTTTCTCTAGCCAACGAGCTGCTGGGCTACTGGTACTTCCGGCGTACCTGGTGGCAGGTCTAC  
CTGGCGCTCGACGTGCTCTTCTGCACCTCGTCCATCGTGCACCTGTGCGCCATCAGCCTGGACCGG  
TACTGGGCAGTGAGCCGCGCGCTGGAGTACAACCTCAAGCGCACCCCGCGCCGCATCAAATGCAT  
CATCCTCACCGTGTGGCTCATCGCAGCCATCATCTCGCTGCCGCCCTCATCTACAAGGGCGACCA  
GGACCCCAAACCCACGAGCGCCCCAATGCAAGCTCAACCAAGAGGCCTGGTACATCTTGGCCT  
CCAGCATCGGGTCTTTTTTGCACCCTGCCTCATCATG-ATCCTCGT-----  
TTCATGGACATGGAGTGCTTCATGATTCTGAACCCAGCCAGCAGCTGGCCATCGCTGTGCTGTC  
CCTCACACTGGGCACCTTACGGTCTGGAGAACCTGCTGGTGTCTGTGTATCCTGCACTCAGC

CAGCCTCCGCTGCCGGCCTTCTACCACTTCATTGGCAGCCTGGCAGTGGCTGACCTCCTGGGCAG  
CGTCATTTTTGTCTACAGCTTTGTGCGACTTCCATGTGTTCCACCGTAAGGATAGCCCCAATGTGT  
TTCTGTTCAAACCTGGGTGGCGTCACGGCCTCCTTCACGGCCTCCGTAGGCAGCCTGTTCCCTCACA  
GCCATCGACAGGTACATATCTATTCACAGGCCCTGGCCTATAAGAGGATCGTCACCAGGCCCAA  
GGCCGTGGTGGCCTTTTGCCTGATGTGGACCATCGCAATTGTCATTGCTGTGCTGCCACTCCTCG  
GCTGGAACCTGCACCTGATGAAAAGACTGAAGGYTCTGACACGGACAGACTTCTCAACAATGACCA

---

TCAGAGATCACTTAACATCCTTGGGGCCAAGGATGATGATTCTGGGCGTACCAGCTGTTATGACC  
CTGACATTCTGGAAACTGATTTCCCAGCCAGTGACATGTGTGATGGTGCCTCAGGGGTGCTCAG  
CCACAGAGGTTAAAAGGGGAAGTTGATCTCTTGTGCCCTTGATCAGAAAAATCAAATAACCTAC  
CTTA---TGATGCTTCTCCTG---CCACTCAGCAGCCAGCACTACCCTAAC---

AGAGGAAGACAAACCACAACCCTTCTTACTAGTGAAACAGAGTCAACCCACCAACTTGCCTCCA  
TGCAGATCAGCAGTCTAGTTCCCTGGCCAACATTGACTTTTATGCCCAAGTAAGTGACATTACA  
CCAGCAGGGAGTGTAGTCCTTTCCCAGGCCAAAAGAGCAAGGCAGGGATACCCCATGCGACAT  
CATGC---

ATCCAGAAGTGATCTCAGTCTGCCAAGCCAATTACAACCTGGACAGTGCCTACTTCTGTGAGGCA  
GATGCCAAAAGTGCAAT-GCTGTGGCCCTCACATGGAAGCCAAGTCCAATGTAGAG---  
CCCAGCTTTAACCTATGAACCCAGCAC---

CCTTGAGACGTCCCAGCAAGCCTCCGCATTCACCAACCTCCCCACGATGAACTGCTGCTCCAGGT  
GCAGAAGAACATTCGCCATGAGGTCCTGGAGGGCAACGTGGGTTATCTACGAGTGGATGACCTCC  
CGGGCCAGGAGGTACTGAGTGAACCTGGGGAGTTCTTGGTGGCTCACGTGTGGAGGAAGCTCAT  
GGGCACCTCCGCCTTGGTCTGGATCTCCGCCACTGCACCGGGGGCCACGTCTCTGGCATCCCCTA  
TGTCATCTCCTATCTGCATCCCGGAATACCGTTCGTGCACGTGGACACCATCTACGACCGCCCCTC  
CAACACCACCACGGAGATCTGGACCTTGCCCAAGGTCCTGGGAGAGAGGTACAGCGCTGACAAGG  
ATGTGGTGGTACTCACCAGCAGCCGCACGGGAGGCGTGGCCGAGGACATCGCCTACATCCTCAAG  
CAGATGCGCAGGGCCATCGTGGTGGGTGAGCGCACGGAGGGGGGCGCCCTGGACCTCCAGAA----

-----

ACGACTTCCCCCTGGATGTTTCCCTCCCGCCAGGTGTGGCCTGAGGACCATGTGTTTCCACR  
CCAAGCTTCAACTACACAGGCCATGACTTTCAGCGCTTCTTTACRGACCTTCACTTTGAGGAAGG  
CTGGTACATGTGGCTACAGTCACGTGACCTGCTGGCAGGGCTCCCGGCACCTGGCGTAGAAGTAT  
ATTGTCTGTATGGCGTGGGACTGCCACACCCCGCACCTACATCTATGACCACAGCTTCCCCTAC  
AAAGACCCTGTGGCTGCGCTCTACGAGGACGGTGATGACACAGTAGCCACACGCAGCATGGAGCT  
CTGTGGCCAGTGGCAGGGCCGCCA-----

-----

TTAGAAAGGATCCAACCAAGCAGATGGGCCAAAAGCAAGGAAGCATGTCATGATGGGCAGATCG  
CCAGCCCCGAGAGGAAGGTGGGTCTGAGTGCTGGTCCCCTCTCTGGGAGACAAACATTGAATGAA  
CAGAAACCTGTGTGCTCCGAGACTCCTGCAGGTAATGAAGGTCCTGCTTGGTTAACCCGAAACAG  
CAGCATTCTGAAGGTAACGAGTGGTTTTCCAGAAGTGGTGAGTTGTTAACTTTTGCTGATACA  
GACAGCGTGAGGGGCGAATCAGATGCCGAAGTAGCTGGAGCTGTACAAGTTGTCGGTGAAGTAA  
GCGGATATTCTGTTCTTCCAAGAGAACGGGCGTCCCGGACACAGATGCTTGTCTGCTGTGCTA  
TGTCAAAGTGAGACCGTCTGCTCCAAACC---

AGAGAGTGATATCAAAGATAAAATATTTGGGAAAACCTATC---

ATAAGAAGGCAGGCCTCACCAATTTGAACCATGTGACTGAAAATCTAATTCCAGGAGCATTTC  
TGCAGAACCACAAATAACACAAGAGCATCCTT-----GGTG-----

CACGGATGCCTCGCTCAGCTCAACCACGCCCTACGTGGAGGACACCCCCGAGCCGCCCTGCATGA  
CTTCTACTGCAGCAAGCTGCTGGATCTGGTCTTCTGCTGGACGGCTCCTCCAGGCTGTCCGAGG

CCGAGTTTGAGGTGCTCAAGGCCTTCGTGGTGAGCACGATGGAGAGGTTGCACATCTCCCAGAAG  
CGCATCCGCGTGGCCGTGGTCGAGTACCACGACGGCTCCCACGCCTACGTGAGCTCAGGGCCCG  
GAGGCGGCCCTCGGAGCTACGCCACCTTGCCAGCCAGGTGAAGTATGCGGGCAGCCAGGTGGCCT  
CCACGAGTGAGGTCTTGAAGTACACCCTCTTCCAGATCTTCGGCAAGGTTGACCGGCCCGAAGCC  
TCCCGYGTGCGGCTGCTCCTCACCGCCAGCCCGGAGCCCCACGCATGGCGCGCAACCTG-----  
GTCCGTTACGTC-----  
CAGGGCTTGGCTGTGGGTTTCCAGGCATTTATAAAAAAACAGCCCAAGTACCTCAAGTTGGGAGC  
TATTGATGTGGAGCGTCTAAGAACACACCAGTCAAATCTCCAGAAGGGTCACAGAAAAGGAGC  
CCCTCATCTACCAATGATTTAACGGCCACTTTCATCATTGATGGCATGCATTGTAAATCGTGTGT  
GTCAAACATCGAGAGTGCTTTATCTACACTCCAGTACGTAAGCAGCATAGCAGTTTCTTTAGAGA  
ATAGGTCTGCCATTGTAAAGTACAATGCCAGCTCTGCCACTCCAGAAGCATTGAGAAGAACAAT  
AGAGTCTGTTTACCAGGGCAATATAAAGTTAGCATTGCAAGTGATGTTGAAAGTACCTCCAAC  
TCTC---  
CCTCCTCCTCATCTCTTCAAAGGTTCTTTGAACATAGTTAGCCAGCCTCTGACTCAAGAAACC  
GTGATAAATATTAGTGGAAATGACTTGTAAATCTTGTGTACAGTCTATAGAAGGTTTGATATCAA  
AAAGGCCAGGTGTAAATCTATA---  
CGAGTCTCCCTTGCAAATAGCACTGGGACTGTTGAGTATGATCCACTGCT-----  
-----  
GCAGAGTGACTGTCCCTGGCCTGGACCTTGTTGACTGTGAACTCTAATCAAGGC-----  
-----TCTTGTAGAAGGGGCACTTGTGACCCTTACTT-AGAATCCAGTTTGGCTTAGTGTG--  
---TGAATTGAGAATATTGTTCTGGGATTTGGAATGCAACATTAATCACA-TTAGCAGGCTTACT-  
CTAATTTGTGTGTTGGTAGCATGCAA-A-----CATG-  
TTTTGTCTGCCCTCTTGCTTCTACTTTCTCCAGGGAAGCCGCCAAAGAGTGTGACGTAGGAAAA  
AAGAATATGTCAAATGTCTGGAGAGCCGAGTCGCAGTGCTGGAAGTCCAGAAC-  
AAGAAGCTTATAGAGGAGCTGGAGACC-----  
ATTTATATCATGTCTATTGTTTGCAAGAACAACAAAAAAGTTACTTTCCACTGTACAGAGAAAG  
ACTTAGTAGGAGATRTTCCCTGAAGGTAGATAYGGTCATTCCATTGATGTGGTGTATAGTCGAGG  
GAAAAGTATGGGTGTTCTCTTTGGAGGGCGGTCTACATGCCTTCTACCCAAAGAACCACAGAAA  
CATGGAATAGGGTAATTGACTGCTTGCCCATGTTTTCTGGTAGATTTTGAATTTGTGTGTGCT  
ACATCATACTACTTCCAGAACTTCCAGGATGGGCTATCTTTTCATGTCTCCATTGCCAGAAATGA  
TACTATATACATTTTAGGAGGACACTCACTTGCCAGTAATATCCGCCCTGCTAATCTGTACAGAA  
TAAGGGTTGATCTTCCCCTGGGTAGCCAGCTGTGAGTTGCACAATTTTAGAGGAGCACTGGGTG  
GGAGGCGGCAGTGAGGGAGACAGCAGCCACGGGG---ACGGGTCTGAGTTTGATGAT---  
GAAGGCATGCTGAGCGACGACCCAGATGGCGCCTGGA---  
GTGAGCGAGGCCCTCCAGGATGAGCAGTGCTGGTGTCCGGTCTAAAGAAGCTAAAGGGGACAA  
TGAGCTGGCCAGCACCCAGATTCCGATGACAGCCAATCCGTGCAGAATCCAGGCAGGAAGTTCT  
TCAGAAAGCCCCGATTTCTGGGAAGATGACCGAGGTCACCTTGCTGGCAGCAACACAAT---  
GGAAGTCCAGAGTGACTCCACAGAAAACCTCAAAGTCTCAGGAGGCCGGTCTAGGCCTCTCCAGGG  
AGGAAAGTGACAGCGACTCCCAGGAGGACAGCACAGACAGTCCGTCCCAGGAAGACAGTTCCRAT  
GGACACGACTCCHGCAGCGAGTCCAGC---GAAGAGGCTGACCGGCCAT

*Jaculus\_blanfordi*

CTCTTACCATTTTCGGCAACGCGTTGGTCATTCTGGCAGTGTTGACCAGCCGCTCGCTACGGCG  
ACCACAGAACCTGTTTCTGGTGTCTCTGGCTGCGGCTGACATCCTGGTGGCCACGCTTATCATTC  
CTTTTTCTTAGCCAACGAGCTGCTGGGCTACTGGTACTTCCGGCGTACCTGGTGGCAGGTCTAC  
CTGGCGCTCGACGTGCTCTTCTGTACCTCGTCCATCGTGCACCTGTGGCCATCAGCCTGGACCGG  
TACTGGGCAGTGAGCCGCGCGCTGGAGTACAACCTCAAAGCGCACCCCGCGCCGCATCAAATGCAT



CATCCTCACCGTGTGGCTCATCGCAGCCATCATCTCGCTGCCGCCCTCATCTACAAGGGCGACCA  
GGACCCCAAACCCACGAGCGCCCCAATGCAAGCTCAACCAAGAGGCCTGGTACATCTTGGCCT  
CCAGCATCGGGTCGTTTTTGCACCCTGCCTCATCATG-ATCCTCGT-----  
TTCATGGACATGGAGTGCTTCATGATTCTGAACCCAGCCAGCAGCTGGCCATCGCTGTGCTGTC  
CCTCACACTGGGCACCTTACGGTCCTGGAGAACCTGCTGGTGTCTGTGTCATCCTGCACTCAGC  
CAGCCTCCGCTGCCGGCCTTCTACCACTTCATTGGCAGCCTGGCAGTGGCTGACCTCCTGGGCAG  
CGTCATTTTTGTCTACAGCTTTGTGCACTTCCATGTGTTCCACCGTAAGGATAGCCCCAATGTGT  
TTCTGTTCAAACCTGGGTGGCGTCACGGCCTCCTTACAGCCTCCGTAGGCAGCCTGTTCCCTACA  
GCCATCGACAGGTACATATCTATTCACAGGCCCTGGCCTATAAGAGGATCGTCACCAGGCCCAA  
GGCCGTGGTGGCCTTTTGCCTGATGTGGACCATCGCAATTGTCATTGCTGTGCTGCCCTCCTCG  
GCTGGAAGTGCACCTGATGAAAAGACTGAAGGCTCTGACACGGACAGACTTCTCAACAATGAAC  
A--  
TCAGAGATCACTTAACATYCTTGGGGCCAAGGATGATGATTCTGGGCGTACCAGCTGTTATGACC  
CTGACATTCTGGAAACTGATTTCCAGCCAGTGACATGTGTGATGGTGCCTCAGGGGTTGCTCAG  
CCACAGAGGTTAAAAGGGGAAGTTGATCTMTTGTGCCTTGATCAGAAAAATCAAATAACCTAC  
CTTA---TGATGCTTCTCCTG---CCACTCAGCAGCCAGCACTACCCTAAC---  
AGAGGAAGACAAACCACAACCACTTCTTACTAGTGAAACAGAGTCAACCCACCAACTTGCCTCCA  
TGCAGATCAGCAGTCTAGTTCCCTGGCCAACATCGACTTTTATGCCCAAGTAAGTGACATTACA  
CCAGCAGGGAGTGTAGTCCTTTCCCCAGGCCAAAAGAGCAAGGCAGGGATACCCCCATGCGACAT  
CATGC---  
ATCCAGAAGTGATCTCAGTCTGCCAAGCCAATTACAACCTGGACAGTGCCTACTTCTGTGAGGCA  
GATGCCAAAAGTGCATT-GCTGTGGCCCTCACATGGAAGCCAAGTCCAATGTAGAG---  
CCCAGCTTTAACCTATGAACCCAGCAC---  
CCTTGAGACGTCCCAGCAAGCCTCCGCATTCACCAACCTCCCCACGATGAACTGCTGCTCCAGGT  
GCAGAAGAACATTCGCCATGAGGTCCTGGAGGGCAACGTGGGTATCTACGAGTGGATGACCTCC  
CGGGCCAGGAGGTAAGTGAAGTGGGGAGTTCTGGTGGCTCACGTGTGGAGGAAGCTCAT  
GGGCACCTCCGCCTTGGTCTGGATCTCCGCCACTGCACCGGGGGCCACGTCTCTGGCATCCCCTA  
TGTCATCTCCTATCTGCATCCTGGGAATACCGTCGTGCATGTGGACACCATCTACGACCGCCCTC  
CAACACCACCACGGAGATCTGGACCCTGCCAAGTCTGGGAGAGAGGTACAGCGCTGACAAGG  
ATGTGGTGGTACTCACCAGCAGCCGCACGGGAGGCGTGGCCGAGGACATCGCCTACATCCTCAAG  
CAGATGCGCAGGGCCATCGTGGTGGGTGAGCGCACGGAGGGGGGCCCTGGACCTCCAGAA-----  
-----  
ACGACTTCCCCCTGGATGTTTTCCCTCCCGCCAGGTGTGGCCTGAGGACCATGTGTTCAATTTCCAGC  
CCAAGCTTCAACTACACAGGCCATGACTTTCAGCGCTTCTTTACGGACCTTCACTTTGAGGAAGG  
CTGGTACATGTGGCTACAGTCACGTGACCTGCTGGCAGGGCTCCCGGCACCTGGCGTAGAAGTAT  
ACTGTCTGTATGGCGTGGGCCTGCCACACCCCGTACCTACATCTATGACCACAGCTTCCCCTACA  
AAGACCTGTGGCTGCGCTCTACGAGGACGGTGATGACACAGTAGCCACACGCAGCATGGAGCTC  
TGTGGCCAGTGGCAGGGCCGCA-----  
-----  
TTAGAAAGGATCCAACCAAGCAGATGGGCCAAAAGCAAGGAAGCATGTCAAGATGGGCAGATCG  
CCAGCCCCGAGAGGAAGGTGGGTCTGAGTGTGCTGCCCTCTCTGGGAGACAAACATTGAATGAA  
CAGAAACCTGTGTGCTCCGAGACTCCTGCAGGTAATGAAGTCTGCTTGGTTAACCCGAAACAG  
CAGCATTCTGAAGGTAAACGAATGGTTTTCCAGAAGTGGTGAGTTGTTAACTTATGCTGATACA  
GACAGCGTGAGGGGCGAATCAGATGCCGAAGTAGCTGGAGCTGTACAAGTTGTCGGTGAAGTAA  
GCGGATATTCTGTCTTCCAAAGAGAACGGGCGTCTGGACACAGATGCTTGTCTGCTGTGCTA  
TGTCAAAGTGAGACCGTCTGCTCCAAACC---

AGAGAGTGATATCAAAGATAAAATATTTGGGAAAACCTATC---  
ATAAGAAGGCAGGCCCTCACCAGTTTGAACCATGTGACTGAAAATCTAATTCCAGGAGCATTGTCT  
GCACAACCACAAATAACACAAGAGCATCCTT-----GGTG-----  
CACGGATGCCTCGCTCAGCTCAACCACGCCCTACGTGGAGGACACCCCCGAGCCGCCCTGCATGA  
GTTCTACTGCAGCAAGCTGCTGGATCTGGTCTTCCCTGCTGGACGGCTCCTCCAGGCTGTCCGAGG  
CCGAGTTTGAGGTGCTCAAGGCCTTCGTGGTGAGCACGATGGAGAGGTTGCACATCTCCAGAAG  
CGCATCCGCGTGGCCGTGGTCGAGTACCACGACGGCTCCCACGCCTACGTGCAGCTCAGGGCCCG  
GAGGCGGCCCTCGGAGCTACGCCACCTTGCCAGCCAGGTGAAGTATGCGGGCAGCCAGGTGGCCT  
CCACGAGTGAGGTCTTGAAGTACACCCTCTTCCAGATCTTCGGCAAGGTTGACCGGCCCGAAGCC  
TCCCGCTGCGCTGCTCCTCACCGCCAGCCCGGAGCCCCACGCATGGCGCGCAACCTG-----  
GTCCGTTACGTC-----  
CAGGGCTTGGCTGTGGGTTTCCAGGCATTTATAAAAAAGCAGCCCAAGTACCTCAAGTTGGGAGC  
TATTGATGTGGAGCGTCTAAAGAACACACCAGTCAAATCTCCAGAAGGGTCACAGAAAAGGAGC  
CCCTCATCTACCAATGATTTAACGGCCACTTTCATCGTTGATGGCATGCATTGTAAATCGTGTGT  
GTCAAACATCGAGAGTGCTTTATCTACACTCCAGTACGTAAGCAGCACAGCAGTTTCTTTAGAGA  
ATAGGTCTGCCATTGTAAAGTACAATGCCAGCTCTGCCACTCCAGAAGCATTGAGAAAAACAAT  
AGAGTCTGTTTACCAGGGCAATATAAAGTTAGCATTGCAAGTGATGTTGAAAGTACCTCCAAC  
TCTC---  
CCTCCTCCTCATCTCTTCAAAGGTTTCTTTGAACATAGTTAGCCAGCCTCTGACTCAAGAAACC  
GTGATAAATATTAGTGGAATGACTTGTAATCTTGTGTACAGTCTATAGAAGGTTTGATATCAA  
AAAGGCCAGGTGTAAAATCTATA---  
CGAGTCTCCCTTGCAAATAGCACTGGGACTGCTGAGTATGATCCACTGCT-----  
-----  
GCAGAGTGACTGTCCCTGGCCTGGACCTTGTGACTGTGAACTCTAATCAAGGC-----  
-----TCTTGTAGAAGGGGCACTTGTGACCCTTACTT-AGAATCCAGTTTGGCTTAGTGTG--  
---TGAATTGAGAATATTGTTCTGGGATTTGGAATGCAACATTAATCACA-TTAGCAGGCTTACT-  
CTAATTTGTGTGTTGGTAGCATGCAA-A-----CATG-  
TTTTGTCTGCCCTCTTGCTTCTACTTTCTCCAGGGAAAGCCGCCAAAGAGTGTCGACGTAGGAAAA  
AAGAATATGTCAAATGTCTGGAGAGCCGAGTCGCAGTGCTGGAAGTCCAGAAC-  
AAGAAGCTTATAGAGGAGCTGGAGACC-----  
ATTTATATCATGTCTTTTGTGTTGCAAGAACAACAAAAAAGTTACTTTCCACTGTACAGAGAAAG  
ACTTAGTAGGAGATATTCCTGAARGTAGATATGGTCATTCCATTGATGTGGTGTATAGTCGAGG  
GAAAAGTTTGGGTGTTCTTTTGGAGGGTGGTCTTCCCTGCCTTCTACACAAAGAACCACAGAAA  
CRTGGAATGGMGGAATTGACTGCTTGCCCATGTTTTCTGCTGGTWTGATTTTGAATTTGTGTGTGC  
TACATCWTACATACTTCCAGAACTTCCAGGATGGGYTATCTTTTTCATGTCTCCATTGCCAAAAAT  
GATACCATATACATTTTATAGGAGGACACTCACTTGCCAGTAATATCCGCCCTGTTAATCTGTACAG  
AATAAGGGTTGATCTTCCCCTGGGTAGCCAGCTGTGAGTTGCATCTTTTATAGAGGAGCACTGGG  
TGGGAGGCGGCAGTGAGGGAGACAGCAGCCACGGGG---ACGGGTCTGAGTTTGATGAT---  
GAAGGCATGCTGAGCGACGACCCAGATGGCGCCTGGA---  
GTGAGCGAGGCCCTCCAGGATGAGCAGTGCTGGTGTCCGGTCTAAAGAAGCTAAAGGGGACAA  
TGAACCGGCCAGCACCACAGATTCCGATGACAGCCAATCCGTGCAGAATCCAGGCAGGAAGTTCT  
TCAGAAAGCCCCGCATTTCTGGGGAAGATGACCGAGGTCACCTTGCTGGCAGCARCACAAT---  
GGAAGTCCAGAGTACTCCACAGAAAACCTCCAAGTCTCAGGAGGCTGGTCTAGGCCTATCCAGGG  
AGGAAAGTGACAGCGACTCCCAGGAGGACAGCACAGACAGTCCGTCCCAGGAAGACAGTTCCAAT  
GGACACGACTCCAGCAGCGAGTCCAGC---GAAGAGGCTGACCGGCCAT

Allactaga\_elater

CTCTTCACCATTTTCGGCAACGCGCTGGTCATTCTGGCTGTGATGACCAGCCGCTCGCTACGCGC  
ACCACAGAACCTGTTTCTGGTGTCCCTGGCTGCTGCGGACATTCTGGTGGCCACGCTTATCATTC  
CTTTTTCTCTAGCCAACGAGCTGCTGGGCTACTGGTACTTCCGGCGCACTTGGTGGAGGTCTAC  
CTGGCGCTCGACGTGCTCTTCTGCACCTCGTCCATCGTGCACCTGTGTGCCATCAGTCTGGACCGG  
TACTGGGCAGTGAGCCGCGCGCTAGAGTACAACCTCCAAGCGCACCCCGCGCCGCATCAAATGCAT  
CATCCTCACCGTGTGGCTCATCGCAGCCATCATCTCGCTGCCGCCCTCATCTACAAGGGTGATCA  
GGGCCCCAAACCCACGAGCGCCCCAATGCAAGCTCAACCAAGAGGCCTGGTACATCTTGGCCT  
CCAGCATCGGGTCTTTTTTTGCACCCTGCCTCATCATG-ATCCTCGT-----  
TTCATGGACATGGAGTGCTTCATGATTCTGAACCCAGCCAGCAGCTGGCCATCGCTGTGCTGTC  
CCTCACACTGGGCACCTTACAGTCCTGGAGAACCTGCTGGTGTGTGTGCATCCTGCACTCAC  
GCAGCCTCCGCTGCCGGCCTTCCCTACCCTTCAATTGGCAGCCTGGCAGTGGCTGACCTCCTGGGCA  
GCGTCATTTTCGTCTACAGCTTTGTGCACTTCCATGTGTTCCACCGTAAAGATAGCCCCAATGTG  
TTTCTGTTCAAACCTGGGCGGGGTCACGGCCTCCTTACGGCCTCCGTAGGCAGCCTGTTCTCACG  
GCCATCGACAGGTACATATCTATTCACAGGCCCTGGCCTATAAGAGGATTGTCACCAGGCCCAA  
GGCCGTGGTGGCCTTTTGTCTGATGTGGACCATCGCAATTGTCATTGCTGTGCTGCCCTCCTCG  
GATGGAAGTGCACCTGATGAAAAGACTGAAGGATCAGACACGGACAGACTTCTAAACAATGACC  
A--  
TCAGAGATCACTTAACATCCTTGGGGCCAAGGATGATGATTCTGGACGTACCAGCTGTTATGACC  
CTGACATTCTGGAAACTGATTTCCATCCAGTGACATGTGTGATGGTGCCTCGGGGGTCGCTCAG  
CCACAGAGGTTAAAAGGGGAAGCTGATCTTGTGCCTTGATCAGAAAAATCAAATAACCTAC  
CTTA---TGATGCTTCTCCTG---CCACTCAGCAGCCAGCATTACCCTAAT---  
AGAGGAAGACAAACCACGGCCACTTCTTACTAGTGAAACAGAGTCAACCCACCAACTYGCTTCCA  
TGCAAATCAGCAATCCTAGTTCCCTGGCCAACATTGACTTTTATGCCCAAGTAAGTGACATTACA  
CCAGCAGGGAGTGATGTCCTTTCTCCAGGCCAAAAGAGTAAGGCAGGGATACCCCATGCGACAT  
CATGC---  
ATCCAGAAGTGATTTTCAGTCTGCCAAGACAATTACAACATGGACAATGCCTACTTCTGTGAGGCA  
GATGCCAAAAGCGCATT-GCTGTGGCCCTCACATGGAAGTCAAATCACATGTAG-----  
-TATGAGCCAGCAC---  
CCTTGAGACTGCCAGCAAGCCTCAGCATTTCGCCAACCTCAGCCACGATGAGCTGCTGATCCAGC  
TGCAGAAGAATATTCACCATGAGGTCTTGGAGGGCAACGTGGGTTATCTACGAGTGGATGACCTC  
CCGGGCCAGGAGTACTGAGTGAACCTGGGGGATTCTTGGTGGCTCACGTGTGGAAGAAGCTCAT  
GGGCACCTCCGCCTTGGTGTGATCTTCCGCACTGCACTAGAGGCCACGTCTCTGGCATCCCCTA  
TGTCATCTCCTATCTGCACCCCGGAATACCGTTCGTGCACGTGGACACCATCTATGATCGCCCTC  
CAACACCACCACGGAGATCTGGACCTTGCCAAGGTCTGGGAGAGAGGTACAGTGTGACAAGG  
ACGTGGTGGTTCTCACCAGTAGTCGCACAGGCGGGGTGGCCGAGGACATCGCCTACATCCTCAAG  
CAGATGCGCAGGGCCATTGTGGTGGGAGAGCGGACTGAGGGGGGCGCCCTGGATCTCCAGAA-----  
-----  
ACGACTTCCCCCTGGATGTTTCCCTCCCGCCAGGTGTGGCCTGAGGACCATGTGTTTCAATTTCCAC  
ACCAAGCTTCAACTACACAGGCCATGACTTTTACGGCCTTCTTTACGGACCTTCACTTTGAGGAAG  
GCTGGTACATGTGGCTGCAGTCACGTGACCTGCTGGCAGGACTCCCAGCACCTGGTGTAGAAGTA  
TACTGTCTGTATGGCGTGGGTCTGCCACACCTCGCACCTACATCTATGACCACAGCTTCCCCTAC  
AAGGACCCTGTGGCTGCACTCTATGAGGACGGTGTGACACAGTAGCCACACGCAGTATGGAGCT  
CTGTGGCCAGTGGCAGGGCCGCA-----  
-----  
TTAGAAAGGTTCCAACAAAGCAGATGGGCCAAAAGTAAGGAAGCATGTCATGATGGGCAGGTTG

CCAGCACCGAGAGGAAAGTGGGTCTGAGTGGTCCCCTATCTGGGAGACTAGCATTGAATGA  
ACAGAAATCTCTATGTGCCGAGACTCCTGCAGATAACGAAGATCTTGCTTGCCTAACCCGAAACA  
GCAGCATTCTGAAAGTGAATGAGTGGTTTTCTAGAAGTGATGAGTTGTTAACT-----  
GATACAAACAACATGAGGGGTAATCAAATGCTGAAGTAACTGGGGCATTAGAAGTTTTCAATA  
AAGTAAGTGGATATTCCTATTCTTCCAAGAAAACGGGTGTCCAGACACCGATCCTTGTCTGCT  
TACTGTGTCAAAGTGAGACAGTCTGCTCCAAACC---  
AGAGAGTAATATCAAAGATAAAATATTTGGGAAAATCTATC---  
ATAAGAAGGCAGGCCTCCCAACTTGAACCATGTGACTCAAATCTAATTCAGGAGCATTGCT  
GCAGAACAAACAATAACACAAGAGCATTCT-----GGTG-----  
CACAGATGTCCCAATCAGCCCTAGCACCCGTATGTAGAAGACACACCCGAACCGCCCTGCATG  
ACTTCTACTGCAGTAAGCTGCTGGATCTGGTCTTCTGCTGGACGGCTCCTCCAGCTGTCTGAG  
GCTGAGTTTGAAGTGGTCAAGGCGTTTGTGGTAGGCACGATGGAGAGGCTGCACATCTCACAGA  
AACGCATCCGTGTGGCCGTCGTGGAGTATCACGATGGTTCCACGCCTACATCGAGCTCAAGGCC  
CGGAAACGGCCCTCAGAGCTGCGACACATTGCCAGCCACGTGAAGTACGCTGGCAGCCAGGTGGC  
CTCCACTAGCGAGGTCTTGAAGTACCCCTGTTTCAAATATTCGGCAACATTGACCGGCCAGAAG  
CTTCCCGCATCACGCTGCTCCTCACTGCCAGCCAGGAGCCCCGCGGATGGTCAGGAACCTG-----  
--GTCCGCTACGTC-----  
CAGGGCTTGGCTGTGGGCTTCCAAGCATTATCAAAAAACAGCCCAAGTACCTCAAGTTGGGAGC  
CATTGATGTGGACCTTCTAAAGAACACACCAGTCAAATCTCCAGAAGGGTCACATAAAAGGAGC  
CCTTCATGTACCAATGATTTAACGACCCCTTTCATCGTTGATGGCATGCATTGTAAATCGTGTGT  
GTCAAACATTGAGAATGCTTTATCTACACTCCAGTATGTAAGCCGCATAGCAGTTTCTTTAGAGA  
ATAGGTCTGCCATCGTAAAGTACAATGCCAGCTCTGCCACTCCAGAAACATTGAGAAAAGCAATA  
GAGTCTGTTTACCAGGGCAATATAAAGTTAGCATTGCAAGTGATGTTGAAAGTACCTCCAACTC  
TC---  
CCTCCTCCTCATCTCTTCAAAGGTTCTTTGAACATAGTTAGCCAGCCTCTGACTCAAGAACT  
GTGATAAATATTAGTGGAAATGACTTGTAATCTTGTGTACAGTCAATAGAGGGAATGATATCAA  
AAAGGCCAGGTGTAATAATCTATA---  
CGAGTCTCCCTTGCAAATAGCACTGGGACTGTTGAGTATGATCCACTGCT-----  
-----  
GCAGAGTGACTGTCCTTGGCCTGGACCTTGTGACTGTGAA--CTAATCAAGGC-----  
-----TCTTGTAGAAGGCACACGTGTGGCCCTTACTT-AGAACCCAGTTTGGCTTAGTGTG---  
---TGAATTGAGAATATTGTTCTGGGATTTGGAATGCAACATTAATCACA-TTAGCAGGCTTACT-  
CTAATTTGTGTGTTGATAGCATGCAA-A-----CATG-  
TTTTGTCTGCCCTCTTGCTTCTACTTTCTCCAGGGAAGCCGCCAAAGAATGTCGACGTAGGAAAA  
AAGAGTATGTCAAATGTCTGGAGAGCCGAGTCGCAGTGCTGGAAGTCCAGAAC-  
AAGAAGCTTATAGAGGAGCTGGAAACC-----  
ATTTATATCATGTCTATTATTGGCAAGAACAACAAAAAGTTACTTTCCACTGTACAGAGAAAG  
ACTTAGTAGGAGATGTTCTGAAGGTAGATACGGTCATTCCATGGATGTGGTGTATAGTCGAGG  
GAAAAGTATGGGCGTTCTCTTTGGAGGGCGATCCTACATGCCTTCTACCCAAAGAACCACAGAAA  
CATGGAATAGGGTAGCTGACTGTCTGCCCATGTTTTCTGGTGGATTTTGAATTTGGGTGTGCT  
ACATCATACTCTTCCAGAACTTCCAGGATGGGCTATCTTTTCATGTCTCTATTGCCAGAAATGA  
TACCATTTACATTTTAGGAGGACACTCACTAGCCAGTAATATCCGCCCTGCTAATCTGTACAGAA  
TAAGGGTTGATCTTCCCCTGGGTAGCCAGCTGTGAGTTGCACAATTTTAGAGGAGCATTGGGTG  
GGAGGTGGCAGTGAGGGAGACAGTAGCCACGGGG---ACGGGTCTGAGTTTGATGAT---  
GAAGGAATGCTGAGTGACGACCCAG---GCGCCAGGA---  
GCGAGCGAAGTCCCTCCAGGATGAGCAGTGCTGGTGTGAGGTCCAAAGAATCGAAAGGGGACAA

TGAACCGGCCGGCCCTCCACATTGGGATGACAGCCAATCCGTGCAGAACCCGGGCAGGAAGTTCT  
TCAGGAAGCCTCGCATCTCTGAGGAAGACGACAGAGGTCACCTTGCTGACAGCAACTAT---  
GGAAGTCCAGAGTGACTCCACCGAGCACTCCAAGTCTCAGGAAGCTGCTCTCAGCCAATCTAGGG  
AGGAAAGTGACAGCGACTCTCAGGAGGACAGCACAGAGAGTCCGTCCAGGAAGACAGTTCAAA  
TGGACAGGACTCCAGCAGTGAGTCCAGC---GAGGAAGTGGACCGGCCAT

*Allactaga\_hotsoni*

CTCTTACCATTTCGGCAACGCGCTGGTCATTCTGGCGGTGATGACCAGCCGCTCGCTACGCGC  
ACCACAGAACCTGTTTCTGGTGTGCTGGCTGCTGCGGACATTCTGGTGGCCACGCTTATCATT  
CTTTTTCTTAGCCAACGAGCTGCTGGGCTACTGGTACTTCCGGCGCACTTGGTGGAGGTCTAC  
CTGGCGCTCGACGTGCTTCTGACCTCGTCCATCGTGCACCTGTGTGCCATCAGTCTGGACCGG  
TACTGGGCAGTGAGCCGCGCGCTAGAGTACAACCTCCAAGCGCACCCCGCGCCGCATCAAATGCAT  
CATCCTCACCGTGTGGCTCATCGCAGCCATCATCTCRCTGCCGCCCTCATCTACAAGGGTGATCA  
GGGCCCCAAACCCACGAGCGCCCCAATGCAAGCTCAACCAAGAGGCCTGGTACATCTTGGCCT  
CCAGCATCGGGTCTTTTTTTGACCCCTGCCTCATCATG-ATCCTCGT-----

TTCATGGACATGGAATGCTTCATGATTCTGAACCCAGCCAGCAGCTGGCCATTGCTGTGCTGTC  
CCTCACACTGGGCACCTTACAGTCCTGGAGAACCTGCTGGTGTGTGTGTCATCTGCACTCAC  
GCAGCCTCCGCTGCCGGCCTTCTACCATTGAGCAGCTGGCAGTGGCTGACCTCCTGGGCA  
GCGTCATTTTTGTCTACAGCTTTGTGACTTCCATGTGTTCCACCGTAAAGATAGCCCCAATGTG  
TTTCTGTTCAAACCTGGGCGGGGTCACGGCCTCCTTACAGCCTCCGTAGGCAGCCTGTTCTCAC  
GGCCATCGACAGGTACATATCTATTACAGGCCCTGGCCTATAAGAGGATCGTCACCAGGCCCA  
AGGCCGTGGTGGCCTTTTGTCTGATGTGGACCATCGCAATCGTCATTGCTGTGCTGCCCTCCTC  
GGATGGAACCTGCACCTGATGAAAAGACTGAAGGATCAGACACGGACAGACTTCTAAACAATGAC  
CA--

TCAGAGATCACTTAACATCCTTGGGGCCAAGGATGATGATTCTGGGCGTACCAGCTGTTATGACC  
CTGACATTCTGGAAACTGATTTCCCATCCAGTGACATGTGTGATGGTGCCTCAGGGGTCGCTCAG  
CCACAGAGGTTAAAAGGGGAAGYTGATCTCTTGTGCCTTGATCAGAAAAATCAAATAACCTAC  
CTTA---TGATGCTTCTCCTG---CCACTCAGCAGCCAGCATTACCCTAAC---

AGAGGAAGACAAACCACGGCCACTTCTTACTAGTGAAACAGAGTCAACCCACCAACTTGCTTCCA  
TGCAAATCAGCAATCCTAGTTCYCTGGCCAACATTGACTTTTATGCCCAAGTAAGTGACATTACA  
CCAGCAGGGAGTGTAGTCCTTTCTCCAGGCCAAAAGAGTAAGGCAGGGATACCCCATGCGACAT  
TATGC---

ATCCAGAAGTGATCTCAGTCTGCCAAGACAATTACAACATGGACAATGCCTATTTCTGTGAGGCA  
GATGCCAAAAGCGCATT-GCTGTGGCCCTCACATGGAAGTC-----  
TATGAGCCCAGCAC---

CCTTGAGACTGCCAGCAAGCCTCAGCATTGCGCAACCTCACCCACGATGAACTGCTGATCCAGC  
TGCAGAAGAATATTCACCATGAGGTCTTGAGGGCAACGTGGGYTATCTACGAGTGGATGACCTC  
CCGGGCCAGGAGTACTGAGTGAACCTGGGGGATTCTGGTGGCTCACGTGTGGAAGAAGCTCAT  
GGGCACCTCCGCCTTGGTGTGACCTTGCCTACTGACTAGAGGCCACGTCTCTGGCATCCCCTA  
TGTCGTCTCCTATCTGCACCCCGGAATACTGTGCTGCACGTGGACACCATCTATGATCGCCCTT  
CCAACACCACCACGGAGATCTGGACCTTGCCAAAGTCTGGGAGAGAGGTACAGCGCTGACAAG  
GACGTGGTGAATCTCACCAGTAGCCGCACAGGCGGGGTGGCCGAGGACATCGCTACATCCTCAA  
GCAGATGCGCAGGGCCATCGTGGTGGGAGAGCGGACTGAGGGGGGCGCCCTGGATCTCCAGAA---

-----  
ACGACTTCCCCCTGGATGTTTCCCTCCCGCCAGGTGTGGCCTGAGGACCATGTGTTTCAATTTCCACG  
CCAAGCTTCAACTACACAGGCCATGACTTTCAGCGCTTCTTTACGGACCTTCACTTTGAGGAAGG  
CTGGTACATGTGGCTGCAGTCACGTGACCTGCTGGCAGGACTCCAGCACCTGGTGTAGAAGTAT

ACTGTCTGTATGGTGTGGGTCTGCCACACCTCGCACCTACATCTATGACCACAGCTTCCCCTAC  
AAGGACCCTGTGGCTGCACTCTATGAGGACGGTGATGACACRGTAGCCACRCGAAGCATGGAGCT  
CTGTGGCCAGTGGCAGGGCCGCCA-----

TTAGAAAGGTTCCAACAAAGCAGATGGGCCAAAAGTAAGGAAGCATGTCATGATGGGCAGATTG  
CCAGCACTGAGAGGAAAGTGGGTCTGAGTGTGGTCCCCTCTCTGGGAGACTAGCATTGAATGAA  
CAGAAATCTCTAYGTGCTGAGACTCCTGCAGATAACGAAGATCTTGCTTGCTTAACCCGAAACAG  
CAGCATTCTRAAAGTGAACGAGTGGTTTTCTAGAAGTGTACTTGTAACT-----

GATACAAACAACACAAGGGATAARTCAAATGCTGAAGTAACTGGGGCATTAGAAGTTTTCAATA  
AAGTAAGTRGATATTCCTATTCTTCCAAGAAAATGGGTGTTCCAGACACTGATCCTTGTCTGTCT  
TTACTGTGTCAAAGTGAACAGTCTGCTCCAAACC---

AGAGAGTAATATCAAAGATAAAATATTTGGGAAAATCTATCATAATAAGAAGGCAGGCCTCCCC  
AACTTGAACCGTGTGACTGAAAATCTAATTCCAGGAGCATTGCTGCAGAACGACAAATAACAC  
AAGAGCATTCT-----GGTG-----

CACAGATGTCCCAATCAGCCCTACCACTCTGTATATAGAAGACACACCCGAGCCACCCTTGCACA  
ACTTCTACTGCAGTAAGCTGCTGGATCTGGTCTTCCTGCTGGACGGCTCCTCCCAGCTGTCTGAG  
GCTGAGTTTGAAGTGTCAAGGCGTTTTGTGGTAGGCACGATGGAGAGGCTGCACATCTCGCAGA  
AGCGCATCCGCGTGGCCGTCGTAGARTATCAYGATGGCTCCAYGCCTACATCGAGCTCAAGGCC  
CGGAAACGGCCCTCAGAGCTGCGACACATTGCCAGCCACGTGAAGTACGCTGGCAGCCAGGCGGC  
CTCCACTAGCGAGGTCTTGAAGTACACCCTGTTTCAAATATTCGGYAACTTGAACCGCCAGAAG  
CTTCCCGCATCACGCTGCTCCTCACTGCCAGCCAGGAGCCCCCGCGGATGGTCAGGAACCTG-----

--GTCCGCTACGTC-----

CAGGGCTTGGCTGTGGGCTTCCAAGCATTATCAAAAAACAGCCCAAGTACCTCAAGTTGGGAGC  
TATTGATGTGGAACGTCTGAAGAACACACCAGTCAAATCTCCAGAAGGGTCACAGAAAAGGAGC  
CCTTCATGTACCAATGATTAAACAACCACTTTCATTGTTGATGGCATGCATTGTAAATCGTGTGT  
GTCAAACATTGAGAGTGCTTTATCTACACTCCAGTATGTAAGCCGCATAGCAGTTTCTTTAGAGA  
ATAGGTCTGCCATCGTAAAGTACAATGCCAGCTCTGCCACTCCAGAAACACTGAGAAAAGCAATA  
GAGTCTGTTTACCAGGGCAATATAAAGTTAGCATTGCAAGTGTGTTGAAAGTACCTCCAACCTC  
TC--

CCTCCTCCTCATCTCTTCAAAGGTTCCATTGAATATAGTTAGCCAGCCTCTGACTCAAGAACT  
GTGATAAATATTAGTGAATGACTTGTAATCTTGTGTACAGTCAATAGAGGGAATGATATCAA  
AAAGGCCAGGTGTAAAATCTATA--

CGAGTCTCCCTTGCAAATAGCACTGGGACTGTTGAGTATGATCCACTGTT-----

GCAGAGTGACTGTCCTTGGCCTGGACCTTGTGACTGTGAA--CTAATCAAGGC-----

-----TCTTGTAGAAGGGACACGTGTGGCCCTTACTT-AGAACCCAGTTTGGCTTAGTGTG---

---TGAATTGAGAATATTGTTCTGGGATTTGGAATGCAACATTAATCACA-TTAGCAGGCTTACT-

CTAATTTGTGTGTTGATAGCATGCAA-A-----CGTG-

TTTTGTCTGCCCTCTTGCTTCTACTTTCTCCAGGGAAGCCGCCAAAGAATGTCGACGTAGGAAAA

AAGAGTATGTCAAATGTCTGGAGAGCCGAGTCGCAGTGTGGAAGTCCAGAAC-

AAGAAGCTTATAGAGGAGCTGGAAACC-----

ATTTATATCATGTCTATTATTTGCAAGAACAACAAAAAGTTACTTTCCACTGTACAGAGAAAG

ACTTAGTAGGAGATGTTCTGAAGGTAGATATGGTCATTCCATGGATGTGGTGTATAGTCGAGG

GAAAAGTATGGGCGTTCTCTTTGGAGGGCGATCCTACACGCCTTCTACCCAAAGAACCACAGAAA

CATGGAATAGGGTAGCTGACTGTCTGCCCATGTTTTCTGGTGGATTTTGAATTTGGGTGTGCT

ACATCATACTCTTCCAGAACTTCCAGGATGGGCTGTCTTCCATGTCTCTATTGCCAGAAATGA

TACCATTTACATTTTAGGAGGACACTCGCTAGCCAGTAATATCCGCCCTGCTAATCTGTACAGAA  
TAAGGGTTGATCTTCCCCTGGGTAGTCCAGCTGTGAGTTGCACAATTTTAGAGGAGCATTGGGTG  
GGAGGTGGCAGTGAGGGAGACAGTAGCCACGGGG---ACGGGTCTGAGTTTGATGAT---  
GAAGGAATGCTGAGTGACGACCCAG---GCGCCAGGA---  
GCGAGCGAAGTCCCTCCAGGATGAGCAGTGCTGGTGTGTCAGGTCCAAAGAATGGAAGGAGACAA  
TGAACCGGCCGGTCCCTCCTCATTGGGATGACAGCCAATCCGTGCAGAACCGGGGCAGGAAGTTCT  
TCAGGAAGCCCCGCATCTCTGAGGAAGACGACAGAGGTCACCTTGCTAACAGCAACACTAT---  
GGAAGTCCAGAGTGA CTCCACCGAACAGTCCAAGTCTCAGGAAGCTGCTCTCAGCCGATCTAGGG  
AGGAAAGTGACAGCGACTCTCAGGAGGACAGCACAGAGAGTCCGTCCCAGGAAGACAGTTCAA  
TGGACAGGACTCCAGCAGTGAGTCCAGC---GAGGAAKCGGACCGGCCAT

Salpingotus\_koslovi

CTCTTACCATTTTCGGCAACGCGCTGGTCAATTCTGGCCGTGTTGACCAGCCGCTCGCTCCGCGCA  
CCACAGAACCTGTTTCTGGTGTCTCTGGCTGCGGGCGGACATCCTGGTGGCCACGCTCATCATTC  
TTTTCTCTAGCCAACGAGCTGCTGGGCTACTGGTACTTCCGGCGCACTTGGTGCAGGTCTACC  
TGGCGCTCGACGTGCTCTTCTGCACCTCGTCCATCGTGCACCTGTGTGCCATCAGTCTGGACCGGT  
ACTGGGCAGTGAGCCGCGCGCTGGAGTACAACCTCAAGCGCACCCCGCGCCGCATCAAATGCATC  
ATCCTCACCGTGTGGTCTATCGCAGCCATCATCTCGCTGCCGCCCTTATCTACAAGGGCGATCAG  
GGTCCCCAAACCCACGAGCGCCCCCAGTGCAAGCTCAACCAAGAGGCCTGGTACATCTTGGCCTC  
CAGCATCGGGTCTTTCTTTGCACCCTGCCTCATCATG-ATCCTCGT-----  
TTCATGGACATGGAGTGTTCATGATCCTGAACCCAGCCAGCAGCTGGCCATCGCCGTGCTSTC  
CCTCACACTGGGCACCTTACGGTGTGAGAACCTGCTGGTGTGTGCGTCATCCTGCACTCRC  
GCAGCCTCCGCTGCCGGCCTTCCCTACCCTTCAATTGGCAGCCTGGCAGTGGCTGACCTCCTGGGCA  
GTGTCAATTTTTGTCTACAGCTTCGTCGACTTCCACGTGTTCCACCGTAAAGACAGCCCCAATGTG  
TTTCTGTTCAAACCTGGGTGGGGTACCGCCTCCTTACGGCCTCCGTGGGCAGCCTGTTCTCAGC  
GCCATCGACAGGTACATATCTATTACAGGCCCTGGCCTACAAGAGGATCGTCACCAGGCCCAA  
GGCCGTGGTGGCCTTTTGCCTGATGTGGACCATGCCATTGTCATTGCTGTGCTGCCCTCCTGG  
GCTGGAACCTGCACCTGATGAAAAGACCGACGGCTCAGACACAGAGAGACTTCTCAACAATGACCA  
---

TCAGAGATCACTTCACATCCTTGGCGCCAAGGATGATGATTCTGGGCGTACCAGCTGTTATGATC  
CTGACATTCTGGAAACTGATTTCCCAGCCAGTGACATGTGTGATGGTGTCTCGGGGGTTGCTCAG  
CCACAGAGTTTTAAAAGGGGAAGCTGATCTCTTGTGCCTTGACCAGAAAAATCAAATAACTTAC  
CTTA---TGATGCTTCTCCTG---CCTCAGCAGCCAGCATTACCCTAAC---  
AGAGGAAGACAAACCACAACCCTTCTTATTAGTGAAACAGAGTCAACCCACCAACTTGCCTCCA  
TGCAGTTGAG-----

TTCACTGGCCAACATTGACTTTTATGCCCAAGTAAGTGACATTACACCAGCAGGGAGTGTAGTCC  
TTTCCCAGGCCAAAAGCATAAAGGAGGATACCCCATGTGACATCATGC---  
ATCCAGAAGTGATCTCAGTCTGCCAAACCAATTACAACATGGACAGTGCCTACTTCTGTGAGGCA  
GATGCCAAAAGTGCACT-ACTGTAGCCTCTCACAAGGAAGTCCAATCACATGTAGAG---  
CCCAGCTTTAAGCTATGAGCCCAGCACCTCCTCGAGGCTTCCCAGCAAGCCTCCACATTCACCAA  
CCTCACCCACGACGAACTGCTGGCCCAGCTGCAGAAAACGTTTACCATGAGGTCTGGAGGGCA  
ACGTGGGCTACCTGCGTGTGGATGACCTCCCGGGCCAGGAGGTGCTGAGTGAGCTCGGGGGCTTC  
CTGGTGGCTCACGTGTGGAGGAAGCTCATGGACACGTCCGCCTTGGTGTGGATCTTCGCCACTG  
TACCAGAGGCCACGTGTCGGGCATCCCCTACGTTATCTCCTACTTGCACCCCGGGAACACCGTCG  
TGCACGTGGACACCATCTATGACCGCCCTCCAACACCACCGAGATCTGGACCTTGCCCAAG  
GTCCTGGGAGAGAGGTACAGCGCTGACAAGGACGTGGTGGTCCCTCACCAGTAGTCGCACGGGAGG  
CGTGGCCGAAGACATYGCCTACATCCTCAAGCAGATGCGCAGGGCCATTGTGG?GGGTGAGAGGA

CGGAGGGGGGCGCCCTGGACCTCCAGAA-----  
ACGACTTCCCCCTGGATGTTTCCCTCCCGCCAGGTGTGGCCTGAGGACCATGTGTTTCCACG  
CCAAGCTTCAACTACACAGCCCATGACTTTCAGCGTTCTTTACGGACCTTCACTTTGAGGAAGG  
CTGGTACATGTGGCTACAGTCACGTGACCTGCTGGCAGGACTCCCAGCACCTGGTGTAGAAGTAT  
ATTGTCTGTATGGTGTGGGTCTGCCACACCCCGCACCTACATCTATGACCACAGCTTCCCCTAC  
AAGGACCCTGTGGCTGCACTCTATGAGGACGGTGTGACACAGTAGCCACACGCAGCATGGAGCT  
CTGTGGCCGGTGGCAGGGCCGCA-----

-----  
CATGTCATGATGGGCAGATTGCCAGCCCCGAGAGGAAGGTGGGTCTGAGTGCTGGTCCCCTCTCT  
GGAAGACAAACATTGAATGAACAGAGACCTCTATGCTCTGAGACTCCTGGAGATAATGAAGGTC  
TTGCTTGGTTATCCTCAAACAGCAGCATTCTGAAAGTGAACGAGTGGTTTTCCAGAAGTGATGA  
GATGTTAACTTTTGTGACACAGATGACATGAGGGGTGAGTCAAATGCTGAAGTAGCTTGGGCA  
TTAGAAGTTTCCAATGAAGTAAACGGATATCCCTATTCGTCCAAGAAAGCGGCCATCTCAGACAC  
TGATCCTTGTCTCCTTTACTATGTCAAAGTGAGAGAGTCTGCTCCAAACC---

AGAGAGTAATATCAAAGATAAAATATTTGGGAAAACCTATC---  
AGAAGAAGGTAAGCCTCCCCAACTTGAACCATGCAACTGAAAATCTAATTCCAGGAGCATTGCT  
GCAGAACCACAAATAACACAAGAGCATCCCT-----GGTG-----  
CACAGATGTCCCGCTCAGCCCTACCACCCCATATGTAGAAGACACCCCCGAGCCACCCCTGCAYGA  
CTTCTACTGCAGCAAGCTGCTGGATCTGGTGTTCCTGCTCGACGGCTCCTCCAGGCTGTCCGAGG  
CCGAGTTTGAAGCGCTCAAGGCCTTTGTGGTGAGCGTGATGGAGAGACTGCACATCTCGCAGAAG  
CGCATCCGTGTGGCCGTGGTGGAGTTCCACGATGGCTCCCATGCCTACATCGAGCTCAAGGCCCG  
GAAGCGGCCCTCGGAGCTGCGACGCATCGCYGGCCAGGTGAAGTATGCCGGCAGCCAGGTGGCCT  
CCACTAGCGAGGTCTTGAAGTACACGCTGTTTCAGATCTTTGACAAAGTCCAGCCGCCAGAAGCC  
TCCCGCATCACTCTGCTCCTGACCCGAGCCAGGAGCCCCACGGATGGCCCGGAACCTG-----  
GTCCGCTACGTC-----

CAGGGCTTGGCTGTGGGCTTCCACGCATTTATCAAAAAACAACCCAAGTACCTCAAGTTGGGAGC  
TATTGATGTGGAACGTCTAAAGAACACACCAGTCAAATCTCCAGAAAAGATCACAGAAAAGGAGT  
CCCTCATCTACCAATGATTTAACAGCCACTTTCTTCGTTGATGGCATGCATTGTAAATCGTGTGT  
GTCAAACATCGAGAGTGCTTTATCTACACTCCAGTATGTAAGCAGCATAGCAGTTTCTTTAGAGA  
ATAGGTGTGCCATTGTAAAGTACAAAGCCAGCTCTGCCACTCCAGAAACACTGAGAAAAGCAAT  
AGAGGCTGTTTACCAGGGCAATATAAAGTTAGTATTGCAAGTGATGTTGAAAGTACCTCCAAC  
TCTC---

CCTCCTCCTCATCTCTTCAAAGGTTCCCTTTGAACTTAGTTAGCCAGCCTCTGACTCAAGAACT  
GTGATAAATATTAGTGGGATGACTTGTAAATCCTTGTGTACAGTCTATAGAGGGTTTGTATCAA  
AAAGGCCAGGTGTGAAATCTATA---  
CGAGTCTCCCTTGCAAATAGCACTGGGAGTGTTGAGTATGATCCACTGCT-----

-----  
GCAGAGTGACTGCCCTTGGCCTGGACTTTGTTGACTGTGAGCTCTAATCAAGGC-----  
-----TCTTGTAGAAGGGACACTTGTGACCCTAACTT-AGAATCCAGTTTGGCTTAGTGTG--  
---TGAATTGGGAATATTGTTCTGGGATTTGGAATGCAACTTTAATCACA-TTAGCAGGCTTACT-  
CTAATTTGTGTGTCGATAGCATGCAA-A-----CATA-  
TTTTGTCTGCCCTTCTGCTTCTGCTTTCTCCAGGGAAGCCGCCAAAGAATGTCGACGTAGGAAAA  
AGGAATATGTCAAATGTCTCGAGAGTCGGGTCGCAGTGCTGGAAGTCCAGAAC-  
AAGAAGCTTATAGAGGAACTGGAAACC-----  
ATTTATTTTCAATGCTATTGTTTGCACAAACAACAAAAATTTACTTCCCATTGTACAGAAAAAG  
ACTTAGTAGG---



TGTTCCCAAAGGTAGATATGGTCATTCAATGGATGTGGT?TACAGTATAGGTAAGTATGAGT  
GCTCTCTTTGGAGGGAGGTCCTACATGCCTTCTACCCAAAGAACCACAGAAACATGGAATAGGGT  
AGCTGACTGCCTGCCCCATGTTTTCTGGTGGATTTTGAATTTGGGTGTGCTACATCATAACATC  
ATCCAGAGCTTCAGGATGGGCTATCTTTTTATGTCTCTGTTGCCAGAAATGATTCTATTTACATT  
TCAGGAGGACACATGCTTACCAATAATCTCTG?CCTGCTAATCTGTACAGAATAAGGGTGGATCT  
TGCCCTGGGTAGCCAAGCTGTGA-----  
GAGGAGCATTGGGAGGGAGGTGGCAGCGAGGGAGACAGTAGCCACGGGG---  
ATGGGTCTGAGTTTGACGAT---GAAGGAATGCTGAGTGATGACCCAGATGGCACCAGGA---  
TTGAACGAAGCCACTCCAGGATGAGCGGGGCGGTGTCAGGTCCAAGGAATCTAAAGGGGACCA  
TGAACCGGCCAGCCCTCGGGACTCGGATGATAGCCAACCCGTGGAGTATCCACGCAGGAAGTTCT  
TGAGAAAGTCCCGCATTTCCGAGGAGGACGACAGAGGTCACCTTACTTACAGCAACACTAT---  
GGAAGTTCAGAGTACTCCACAGAAAACCCCAAATCTCAGGAAGCTGGTCTGAGCCAATCCAGGG  
AGGAAAGTGAGAGCGACTCTCAGGAGGACAGCGCAGAGAGCCCGTCCCAGGAAGACAGTTCACA  
TGGACAAGACTCCAGCAGTGAGTCCAGC---GAAGAAGTGGACCAGCCAT

*Peromyscus polionotus*

CTCTTACCATTTTCGGCAACGCACTGGTCATTCTGGCTGTGTTGACCAGCCGCTCACTCCGTGCA  
CCACAAAACCTCTTTCTGGTGTCACTGGCAGCCGCGGACATCCTAGTGGCCACCCTTATCATCCCT  
TTCTCTCTGGCCAACGAGCTGCTGGGCTACTGGTACTTTTGGCGCACATGGTGGGAGGTCTACCT  
GGCGCTGGATGTGCTCTTCTGTACCTCCTCCATCGTGCACCTGTGTGCCATCAGCCTGGACCGAT  
ACTGGGCAGTGAGCCGAGCACTGGAGTACAACTCCAAGCGCACGCCGCGCCGCATCAAATGCATC  
ATCCTCACTGTGTGGCTCATTGCAGCCGTCATTTCTCTGCCGCCCTCATCTATAAGGGCGACCA  
GCGCCCGGAGCCTCACGGGCTCCCCAGTGTGAGCTCAACCAAGAGGCCTGGTACATCTTGGCTT  
CCAGCATCGGATCTTTCTTGTCCCTGCCTCATCATG-ATCCTCGT-----  
TTCATGGACATGGAGTGCTTTATGATTCTGAACCCAGTCAGCAGCTGGCCATTGCCGTGCTCTC  
CCTCACACTGGGCACCTTACCGTTCTGGAGAACCTGCTGGTTCTGTGCGTCATCCTTCACTCCCG  
CAGTCTCCGATGCCGGCCCTCCTACCATTCACTGGCAGTCTGGCGGTGGCCGACCTCCTGGGAA  
GCGTCATTTTTGTCTACAGCTTTGTTGACTTCCATGTGTTCCACCGTAAAGACAGTCCCAATGTG  
TTTCTGTTCAAACCTGGGTGGGGTACAGCCTCCTTACAGCTTCCGTGGGCAGCCTGTTCTCAC  
AGCCATTGACAGGTACATATCCATTACAGGCCTCTGGCCTATAAGAGGATCGTCACCAGGCCCA  
AGGCCGTGGTGGCTTTTTGCCTGATGTGGACTATTGCAATAGTAATTGCTGTGCTGCCTCTCCTT  
GGCTGGAAGTGCAGCAGATGAAAAGACTGAAGGGTCAGACACAGACAGACTCCTGAGTAATGCC  
CA--  
TGAGAAATCACTCGGCATCCTTGGAGCAAAGGATGACGATTCTGGACGCACCAGCTGCTATGACC  
CTGACATTTTGGACCCTGATTTCCACACTAGTGACGTGTGTGATGGTACCTCAGAGTTTGCTCAG  
CCACAGAAGTTAAAAGAGGAAGCTGATCTCTTGTGCCTTGACCAGAAGAATCTGAAGAACTCGC  
CTTA---TGGTGCTTCCCTCG---GCTCTCTGCACCCCTGCATTACCCTAAC---  
AACGGAAGACAAACCACAGCCACTTCTGAGGAGTGAAACTGAGTCAACCCACCAACCTGCCTCCA  
CCCAGATGAGCAATCCTGCTTCACTGGCAAACATCGACTTTTATGCCCAAGTAAGCGACATTACA  
CCAGCAGGCAGTGTGGTCTTTCTCCAGGCCAAAAGATTAAGGCAGGGATGGCCCAGTGCAACAT  
GCAGCCGCAACCTCAGGTGGCTGCGCCCTGCCAAGAAAATTACAACCTGAACAGTGCCTACTTCT  
GTGAGTCAGATGCCAAAAAGTGCATC-  
GCTGTGACCCCTCACTTGGAAAGCCACGCCATGTGTAAAA---  
CCAAGCTTTAACCTATGAGCCCAGTAC---  
CCTCGAGACGCCCAGCAAGCGCCAACTCACCAACCTCACCCGAGAAGAAGTGTGGTCCAGC  
TACAGAGGAACATCCACCATGAGGTTCTTGAGGGCAACGTGGGTTACCTACGAGTGGATGACCTC  
CCTGGCCAGGAGTACTGAGTGAGCTGGGGGGTCTTGGTGGACCACGTGTGGAGGCAGCTCAT

GGACACCTCCTCCTTGGTGCTAGATCTCCGGAAGTGTGCTGGTGGTCACATCTCTGGGATCCCTT  
ATGTCATCTCCTACTTGCACCCTGGGAACACTGTCATGCACGTGGATAACCATCTATGATCGCCCC  
TCTAATACCACCACCGAGATCTGGACCTTGCCCAAGGTCTAGGGGAGAGATACAGTGCTGACAA  
AGACGTGGTAGTCCTCACCAGTGGACGTACCGGGGGCGTGGCTGAGGACATCGCCTACATCCTCA  
AGCAGATGCGCAGGGCCATCGTGGTGGGTGAGCGGACGGAGGGTGGTGCCCTGGACCTCCAGAA-

-----  
ACGACTTCCCCCTGGATGTTTCCCTCCCGCCAGGTGTGGCCTGAGGACCATGTGTTTCCACG  
CCAAGCTTCAACTACACGGGCCATGACTTTCAGCGCTTCTTTACGGACCTTCACTTTGAGGAAGG  
ATGGTACATGTGGCTACAGTCACGTGACCTGCTGGCAGGACTCCAGCACCTGGTGTGGAAGTAT  
ACTGTCTGTATGGCGTGGGTCTGCCCACACCCCGCACCTACATCTATGACCACAGTTTCCCCTACA  
AGGACCTGTGGCTGCACTCTATGAGGACGGTGTATGACACAGTGGCCACACGTAGCACTGAGCTC  
TGTGGTCAATGGCAAGGCCGCA-----

-----  
TTAGAAAGGAGCCAACAGAACAGATGGGCTGAGAGTAAAGAAACATGTAATGATAGGCAGATTC  
CCAGCACTGAGAAAAAGGTAGATCTGGATGCTGAGTCCCTCTGTGGGAGGAAGAAATGGAATAA  
TCAGGAAAGTCTGTGCCCTGAGAATGCTAGAGCTACCCAAGATGTTTCCCTGGACGACACGAAATA  
GCAGCATTGAGAAAGTTAACGAGTGGTCTCCAAGACTGGTGGAAACGTTAGTCTCTGACGGCACT  
TCAGACAGGAGGCGGCAGGCAAATGCTGAGGCAGCTGCTGTGCTCGAAGTTTCCAGTGAAGTAG  
ATGGGTGTTCCAGTTCTTTAAAGGAAACAGACTTTCGTGGCCTCTGATCCCCATAATGCTTTAATG  
TATAAGAGCAAAAGAGACTTCTCCAAACCAGTAGAGAATGATATCAAAGATAAAAATATTTGGGA  
AGACATATC---AGAGAAAGGGAAGCCTCCCTCACTTGAACCATGTAACCTGAAA-----

TTCTAGGCACATATACTACAGAACCACAGATAACACAAGCGAACCCCT-----GGTC-----  
AACAGATGCCCCAGTCAGCGCCACCACCCCATATGTTGAAGACACCCCTGAGCCACCCTTGCACA  
GCTTCCAATGCAGCAGGCTGCTAGATCTTGTCTTCCCTGCTGGATGGCTCCTCCAGGCTGTCTGAG  
GCTGAGTTTGGAGGTGCTCAAGACCTTTGTGGTGGGCATGATGGAGAGGCTGCATGTCTCTCAGA  
AGCGCGTCCGTGTGGCAGTGGTTGAGTACCACGATGGATCCCATGCCTACATTGAGCTCAAGGCT  
CGGAAGCGACCCTCAGAGCTTCCGGCGCATTGCCAGCCAGGTTAAGTACGCGGGTAGCCAGGTAGC  
CTCTACCAGCGAGGTTTTGAAGTACACACTGTTCCAGATCTTTGGCAAATCGATCGCCCTGAAG  
CCTCCCGCATCATTCTACTCCTGACTGCTAGCCAGGAGCCCCACGGATGGCCAGGAATTTG-----  
--GTTTCGCTATGTC-----

CAGGGCTTGGCTGTGGGCTTCCCAGCCTTCATAAAAAAGCAGCCCAAGTACCTCAAATTAGGAGC  
CATTGATGTTGAGCGCCTGAAGAACACAACGGTCAAATCCCAGAAGGATCACAGCAAAAGAGC  
CCATCATATCCCAGTGATTCAACAGCCACATTCATCGTAGAGGGCATGCATTGTAAATCATGTGT  
GTCAAATATCGAAAGTGCTTTATCTACACTCCAGTATGTAAGCAGTATAGTCGTTTCTTTAGAG  
AATAGGTCAGCCATTGTAAAGTACAATGCAAGCTCAGTCACTCCAGAAATGCTGAGAAAAGCAA  
TAGAGGCCGTTTTACCAGGGCAATACAGAGTTAGTATTGCAAATGAAGTTGAAAGTACCGCCAG  
CTCTC---

CCTCCAGCTCATCTCTTCAAAGATGCCTTTGAACATAGTTAGCCAGCCTCTGACCCAAGAACT  
GTGATCAACATTAATGGCATGACTTGTAAATCTTGTGTGCAGTCTATAGAGGGTGTGCATATCAA  
AAAAGCCAGGTGTAATAATCCATC---  
CATGTTTCCCTCGCAAATAGTACTGGGACTGTTGAATATGATCCTCTACT-----

-----  
GCAGAGTAACTGTGTTTACTTGGACCTTGTTTACTGTGAACTCTAATCGAGGCAGGCGATACAG  
CA--TCCTCCTAATGGCCGTGTGGACTTGTAGATGGGTCTCT--  
TAACCCTTGCTTAAGAATCCAGTTTGGCGTAGGGTG-----  
TGAGTTGGGCATACTGTTCCACGGGTTGCAGCACAGCTCTGCTCACA-TGACCAAGCTTGCT-

CTG-----TTGTCAATAGCATGCAACA-----TATG-  
TTTTGTTTGCCTTCTGCTTCTACTTTTTCCAGGGAAGCTGCTAAAGAATGTCGACGTCGAAAGA  
AAGAATATGTAAAGTGTCTGGAGAGTCGCGTTGCAGTGCTGGAAGTTCAGAAC-  
AAGAAGCTTATAGAGGAACCTGAAACC-----  
ATTTATATCATGTCTGTTGCTTGCAAGAACAACAAAAAAGTTACTTTCCGTTGTACAGAGAAAG  
ATTTAGTAGGAGATGTCCCCGAAGCCAGATATGGTCATTCCATTGATGTGGTGTACAGTCGAGG  
GAAAAGTATGGGTGTTCTCTTCGGAGGACGATCATACATGCCTTCTACCCAGAGAACCACAGAAA  
AATGGAATAGTGTAACTGACTGCCTGCCCCATGTTTTCTTGGTAGATTTTGAATTTGGGTGTGCT  
ACATCATACATTCTTCCAGAACTTCAGGACGGCTGTCTTTTCATGTTTCTATTGCCAGAAATGA  
TACGATTTACATTTTAGGAGGACATTCACTTGCCAATAACATCCGCCCTGCCAACCTGTATAGAA  
TAAGGGTAGATCTCCCCCTGGGAAGCCCAGCAGTAACTGCACGGTCTTGAGGAACACTGGGTT  
GGAGGTGGCAGTGAGGGGGAGAGCAGCCATGGGG---  
ACGGCTCTGAGTTTGATGATGAAGAAGGGATGCTGAGCGACGACCCCGAGGGCACCAGGA---  
GCGACCGAGGCCACGCCAGGATGAGCAGCGCCGGCATCAGGTCCAAAGAATCCAAAGGGGACCTG  
GAGCTGGCGAGCGCTCAGGATCCAGATGACAGCCAGTCGGTGGACCCGCCAGGCAGCAAGTCCTT  
CAGAAGGTCCCAGGTCTCCGAGGAAGATGACCGAGGCGAGCGCCAGACAGCAGGAGCAG---  
GGAAACCCAGAGCGACTCCACAGAG-----  
GACACCGTCTCCAAGGAGGACACCGCCGAGAGCCGGTCCCGGGAAGACAGTCCAGAGGGACAAGA  
CACCAGCAGCGAGTCCAGC---GAGGAGGCCGGCGGGCCAT

*Peromyscus\_leucopus*

CTCTTACCATTTTCGGTAACGCACTGGTCATTCTGGCTGTGTTGACCAGCCGCTCACTCCGTGC  
ACCACAAAACCTCTTTCTGGTGTCACTGGCAGCCGCGGACATCCTAGTGGCCACCCTTATCATCC  
CTTTCTCTCTGGCCAACGARCTGCTGGGCTACTGGTACTTTTGGCGCACATGGTGCAGGTCTAC  
CTGGCGCTGGATGTGCTCTTCTGTACCTCCTCCATCGTGCACCTGTGTGCCATCAGCTGGACCGA  
TACTGGGCAGTGAGCCGAGCACTGGAGTACAACCTCCAAGCGCACGCCGCGCCGCATCAAATGCAT  
CATCCTCACTGTGTGGCTCATTGCAGCYGTCATTTCTCTGCCGCCCTCATCTATAAGGGCGACCA  
GCGCCCGGAGCCTCACGGGCTCCCCAGTGTGAGCTCAACCAAGAGGCCTGGTACATCTTGGCTT  
GCAGCATCGGATCTTTYTTTGTCCCTGCCTCATCATG-ATCCTCGT-----  
TTCATGGACATGGAGTGTTTTAAGATTCTGAACCCAGTCAGCAGTTGGCCATTGCCGTGCTCTC  
CCTCACACTGGGCACCTTACCCTTCTGGAGAACCTGCTGGTTCTGTGCGTCATCTGCACTCCCC  
CAGTCTCCGATGCCGGCCCTCCTACCATTTCATTGGCAGTCTGGCRGTGGCTGACCTCCTGGGAA  
GCGTCATTTTTGTCTACAGCTTTGTTGACTTCCATGTGTTCCACCGTAAAGACAGCCCCAATGTG  
TTTTCTGTTCAAACCTGGGTGGGGTCACGGCCTCCTTACAGCTTCCGTGGGCAGCCTGTTCTCAC  
AGCCATTGACAGGTACATATCCATTACAGGCCTCTGGCCTATAAGAGGATCGTCACCAGGCCCA  
AGGCCGTGGTGGCTTTTTGCCTGATGTGGACTATTGCAATAGTAATTGCTGTGCTGCCTCTCCTT  
GGCTGGAACCTGCAGCAGATGAAAAGACTGAAGGGTCAGACACAGACAGACTCCTAAGTAATGCC  
CCATTTGAGAAATCACTCGGCATCCTTGGAGCAAAGGATGACGATTCTGGACGCACCAGCTGCTA  
TGACCCTGACATTTTGGACCCTGATTTCCACACTAGTGACATGTGTGATGGTACCTCAGAGTTTG  
CTCAGCCACAGAAGTTAAAAGAGGAAGCTGATCTTGTGCCTTGACCAGAAGAATATGAAGAA  
CTCGCCTTA---TGGTGCTTCCCTCG---GCTCTCTGCACCCCTGCATTACCCTAAC---  
AACGGAAGACAAACCACAGCCACTTCTGAGGAGTGAACCTGAGTCAACCCACCAACCTGCCTCCA  
CCCAGATGAGCAATCCCGCTTCACTGGCAAACATCGACTTTTATGCCCAAGTAAGCGACATTACA  
CCAGCAGGCAGTGTGGTCTTTCTCCAGGCCAAAAGATTAAGGCAGGGATGGCCCAGTGCAACAT  
GCCGCCGCAACCTCAGGTGGCTGCGCCCTGCCAAGAAAATTACAACCTGAACAGTGCCTACTTCT  
GTGAGTCAGATGCCAAAAAGTGCATC-  
GCTGTGACCCCTCACTTGGAGGCCACGCCATGTGTAAAAAC?CCAAGCTTTTACCTATGAGCCCA

GTAC---

CCTCGAGACGCCCCAGCAAGCGCCAACACTCACCAACCTCACCCGAGAAGAAGTGTGGTCCAGC  
TACAGAGGAACATCCACCATGAGGTTCTTGAGGGCAACGTGGGTACCTACGAGTGGATGACCTC  
CCTGGCCAGGAGTACTGAGTGAGCTGGGGGGTCTTGGTGGACCAGTGTGGAGGCARCTCAT  
GGACACCTCCTCCTTGGTGCTAGATCTCCGAACTGTGCTGGTGGTCACATCTCTGGGATCCCTT  
ATGTCATCTCCTACTTGCACCCTGGGAACACTGTCATGCACGTGGATACCATCTATGATCGCCCC  
TCTAATACCACCACCGAGATCTGGACCTTGCCCAAGGTCCTAGGGGAGAGATACAGTGCTGACAA  
AGACGTGGTAGTCCTCACCAGTGGACGTACCGGGGGCGTGGCTGAGGACATCGCCTACATCCTCA  
AGCAGATGCGCAGGGCCATCGTGGTGGGTGAGCGGACGGAGGGTGGTGGCCTGGACCTCCAGAA-

-----  
ACGACTTCCCCCTGGATGTTTCCCTCCCGCCAGGTGTGGCCTGAGGACCATGTGTTCAATTTCCACG  
CCAAGCTTCAACTACACGGGCCATGACTTTCAGCGCTTCTTTACGGACCTTCACTTTGAGGAAGG  
ATGGTACATGTGGCTACAGTCACGTGACCTGCTGGCAGGACTCCCAGCACCTGGTGTGGAAGTAT  
ACTGTCTGTATGGCGTGGGTCTGCCACACCCCGCACCTACATCTATGACCACAGTTTCCCCTACA  
AGGACCTGTGGCTGCACTCTATGAGGACGGTGTGACACAGTGGCCACACGTAGCACTGAGCTC  
TGTGGTCAATGGCAAGGCCACCA-----

-----  
TTAGAAAGGAGCCAACAGAACAGATGGGCTGAGAGTAAAGAAACATGTAATGATAGGCAGATTC  
CCAGCACTGAGAAAAAGGTAGATCTGGATGCTGAGTCCCTCTGTGGGAGGAAGAAATGGAATAA  
TCAGGAAAGTCTGTGCCCTGAGAATGCTAGAGCTACCCAAGATGTTCTTGGACGACACGAAATA  
GCAGCATTCAGAAAGTTAACGAGTGGTTCTCCAAGACTGGTGGAAACGTTAGCTCCTGACGGYACT  
TCAGACAGGAGGCGGCAGGCAAATGCTGAAGCGGCCGCGYGTGCTCGAAGTTTCCAATGAAGTAG  
ATGGGTGTTCCGGTTCTTTAAAGGAAACAGACTTCGTGGCCTCTGATCCCATAATGCTTTAATG  
TATAAGAGCAAAAAGAGACTTCTCCAACCAGTAGAGAATGATATCAAAGATAAAAATATTTGGGA  
AGACATATC---AGAGAAAGGGAAGCCTCGCTCATTTGAACCATGTAACCTGAAA-----

TTCTAGGCACATATACTACAGAACCACAGATAACACAAGCGAACCCT-----GGTC-----  
AACAGATGCCCCAGTCAGCGCCACCACCCCATATGTTGAAGATACCCCTGAGCCACCCCTGCACA  
GCTTCCAATGCAGCAGGCTGCTAGATCTTGTCTTTCTGCTGGATGGCTCCTCCAGGCTGTCTGAG  
GCTGAGTTTGAGGTGCTCAAGACCTTTGTGGTGGGCATGATGGAGAGGCTGCATGTCTCTCAGA  
AGCGCGTCCGTGTGGCAGTGGTTGAGTACCACGATGGATCCCATGCCTACATTGAGCTCAAGGCT  
CGGAAGCGACCCCTCAGAGCTTCGGCGCATTGCCAGCCAGGTTAAGTACGCAGGTAGCCAGGTAGC  
CTCTACCAGCGAGGTTTTGAAGTACACACTGTTCCAGATCTTTGGCAAAAATCGATCGCCCTGAAG  
CCTCCCGCATCATTTACTCCTGACTGCTAGCCAGGAGCCCCACGGATGGCCAGGAATTTG-----  
--GTCCGCTATGTC-----

CAGGGCTTGGCTGTGGGCTTCCCAGCCTTCATAAAAAAGCAGCCCAAGTACCTCAAATTAGGAGC  
CATTGATGTTGAGCGCTGAAGAACACAACGGTCAGATCCCAGAAAGGATCACAGCAAAAGAGC  
CCATCATATCCCAGTGATTCAACAGCCACATTCATCATAGAGGGCATGCATTGTAAATCATGTGT  
GTCAAATATTGAAAGTGCTTTATCTACACTCCAGTATGTAAGCAGTATAGTCGTTTCTTTAGAG  
AATAGGTCAGCCATTGTAAAGTACAATGCAAGCTCAGTCACTCCAGAAATGCTGAGAAAAGCAA  
TAGAGGCCGTTTACCAGGGCAATACAGAGTTAGTATTGCAAATGAAGTTGAAAGTACCGCCAG  
CTCTC---

CCTCCAGCTCATCTCTTCAGAAGATGCCTTTGAACATAGTTAGCCAGCCTCTGACCCAAGAACT  
GTGATCAACATTAATGGCATGACTTGTAAATCTTGTGTGCAGTCTATAGAGGGTGTATATCAA  
AAAAGCCAGGTGTAAAATCCATC---

CATGTTTCCCTCGCAAATAGTACCGGGACTGTTGAATATGATCCTCTACT-----

TAACTGTGTTTACTTGGACCTTGTACTGTGAACTCTAATCGAGGCAGGCGATACAGCA--  
TCCTCCTAATGGCCGTGTGGACTTGTAGATGGGTCTCT--  
TAACCCTTGCTTAAGAATCCAGTTTGGCGTAGGGTG-----  
TGARTTGGGCATACTGTCCCACGGGTTGCAGCACAGCTCTACTCACA-TGACCAAGCTTGCT-  
CTG-----TTGTCAATAGCATGCAACA-----TATG-  
TTTTGTTTGGCCCTTCTGCTTCTACTTTTTCCAGGGAAGCTGCTAAAGAATGTCGACGTGCAATGA  
AAGAATATGTAAAGTGTCTGGAGAGTCGCGTTGCAGTGCTGGTAGTTCAGAAC-AAGAAGC-----

-----  
ATTTATATCATGTCTGTTGCTTGCAAGAACAACAAAAAAGTACTTTCCGTTGTACAGAGAAAG  
ATTTAGTAGGAGATGTCCCCGAAGCCAGATATGGTCATTCCATTGATGTGGTGTACAGTCGAGG  
GAAAAGCATGGGTGTTCTTTCGGAGGACGATCATACATGCCTTCTACCCAGAGAACCACAGAAA  
AATGGAATAGTGTAGCTGACTGCCTGCCCATGTTTTCTTGGTAGATTTTGAATTTGGGTGTGCT  
ACATCATACATTCTTCCAGAACTTCAGGACGGGTTGTCTTTTCATGTTTCTATTGCCAGAAATGA  
TACGATTTACATTTTAGGAGGACACTCACTTGCCAATAACATCCGCCCTGCCAACCTGTATAGAA  
TAAGGGTAGATCTTCCCCTAGGAAGCCAGCAGTAAACTGCACGGTCTTGGAGGAACACTGGGTT  
GGAGGTGGCAGTGAGGGAGAGAGCAGTCACGGGG---  
ACGGCTCTGAGTTTGATGATGAAGAAGGGATGCTGAGCGACGACCCCGAGGGCACCAGGA---  
GCGACCGAGGCCACGCCAGGATGAGCAGCGCCGGCATCAGGTCCAAAGAATCCAAAGGGGACCGG  
GAGCTGGCGAGCGCTCGGGATCCAGACGACAGCCAGTCTGTGGACCCGCCAGGCAGCAAGTCCTT  
CAGAAGGTCCCAGGTCTCCGAGGAAGATGACCGAGGCGAGCGTCCAGACAGCAGCAGCAG---  
GGAAACCCAGAGCGACTCCACAGAG-----  
GACACCGTCTCCAAGGAGGACACCCGCCG-  
GAGCCGGTCCCGGAAGACAGTCCAGAGGGACAAGACACCAGCAGTGAGTCCAGCGAGGAGGAG  
GCCGGCGGGCCAT

Dipodomys\_ordii

CTCTTACCATTTTTGGGAACTCACTGGTCATCCTGGCTGTGTTGACCAGCCGTTCCCTGCGCGCC  
CCACAAAACCTGTTCCCTGGTGTGCTGGCGGCCGCTGACATCTTGGTGGCCACGCTCATCATCCCT  
TTCTCGCTGGCCAATGAGCTGTTGGGCTACTGGTACTTCCGGCGCACGTGGTGGCAGGTTTACTT  
GGCGCTCGACGTACTTCTGTACTTTCGTCCATTGTGCACCTGTGCGCCATCAGCCTGGATCGCT  
ACTGGGCGGTGAGCCGCGCGCTGGAGTACAACCTCAAACGCACTCCGCGCCGCATCAAGTGCATC  
ATCCTCACCGTGTGGCTCATCGCAGCCTTCATCTCGCTGCCGCCCTCATCTACAAGGGTGACCAG  
GGACCCAGCCCCACGGGCGCCCCAATGCAAGCTCAACCAAGAGGCCTGGTACATYTTGGCTCC  
AGCTTCGCGTCTTTCTTTGCACCCTGCCTTATCATG-ATTCTTGT-----

TTCATGGACATGGAGTGCTTCATGATCCTCAACCCAGTCAGCAGCTGGCCATCGCCGTAAGTGC  
CCTCACACTGGGCACCTTACGGTTCTGGAGAACCTGCTCGTGCTGTGTGTCATCCTCCACTCCCG  
CAGCCTCCGCTGCAGGCCTTCCCTACCCTTCATCGGCAGCCTGGCCGTGGCAGACCTGCTGGGGAG  
TGTCATATTTGTCTACAGCTTCGTTGACTTCCACGTGTTCCACCGCAAAGACAGCCCAATGTGT  
TTCTGTTCAAACCTGGGTGGGTCACGGCCTCCTTACCAGCCTCTGTAGGCAGCCTGTTCCCTCACC  
CCATCGACAGGTACATCTCCATTCACAGGCCACTGGCCTATAAAAGGATCGTCACCAGGCCCAAG  
GCTGTGGTGGCTTTCTGCCTGATGTGGACCATAGCTATTGTGATTGCCGTGCTGCCTCTCCTGGG  
CTGGAACCTGCACTGGATGAAAAACGGAAGGGTCAGATACAGACAGACTTCTAAACAGTGACCG-

--  
TCAGAAATCACTGAATCTCCTTGGGGCAAAGGATGATGACTCTGGGCGTACCAGCTGTTATGAGC  
CTGATCTTCTAGAGACTGATTTCAATGCCAGTGACATAGATGATGGTACCTCAGAGGTGGCTCAG  
CCACAGAGGTTAAAAGGGGAAGCTGATCTTGTGCCTTGACCAGAAGAATCAAATAAACCAT  
CTTATCCTCATGCCTCCTCTG---TCACTACCGGCCTAGTGTAAATCCGAGT---

AGAGGAAGACAAACCACAACCACTTCTGACTGGGGAAACTGAGTCAGCTCCCCAAGTTGTCCCTA  
CCCAGATAAACAAATCCAAGTTCCTGACTGGCAAACATTGACTTTTATGCCAGGTAAGCGACATTACA  
CCAGCAGGGAGTGTGGTCCTTTCTCCAGGCCAAAGGAATAAGGCAGGGACAGCCCAGAGCAGTGT  
---GC---

ATGCAGAAGAAGTGTCACTCTGCCAAGCAAACCTTCATCGCGGACAACGCCTACTTCTGTGAGTCA  
GATGCCAAGAAGTGCATC-CCTTCCGCCCTCACACAGAGGTGAAGGCACTCACAGAA---  
CCTCGCTTTAACCTATGAACCCAGCAC---

CCTGGAGGCTCCCCGGCAAACCACAGCACCCAGCAACTTCACCCAAGAGGAGCTGCTAATGTGGC  
TGCAGGAGAAGATACACCATGAGGTCTGGAGGGTAACGTGGGCTACCTGAGGGTGGATGACCT  
CCCAGGCCGGGAGGTGCTGAGCAAGCTCGGAGATTTCTTGGTGGCCACGTGTGGAGCCAACTCA  
TGGGCACCTCTGCCTTGGTGTGGATCTCCGACATTGCACCAGCGGCCACGTCTCAGGAATCCCC  
TACGTCGTTTCTACCTGCACCCTGGGAACACGGTCTTGCACGTGGATACCATCTACGATCGCC  
CTCCAACACCACCAGGAGATCTGGACCTACCCAAGGTCTGGGAGAAAGGTACAGCGCTGAGA  
AGGATGTGGTGGTCTCACAGCGGCCGACCCGAGGAGTGGCCGAGGACATCGCCTACATCCTC  
AAGCAGATGCGCAGGGCCATCGTGGTGGGGGAGCGGACCGAGGGGGAGCCCTGGATCTCCAGA  
A-----

ACGACTTCCCCYTGGATGTTTCCCTCCCGCCAGGTGTGGCCTGAGGACCATGTGTTTCAATTTCCACG  
CCAAGCTTCAACTACACGGGCCATGACTTTCAGCGCTTCTTTACGGACCTTCACTTTGAGGAAGG  
ATGGTACATGTGGCTACAGTCACGTGACCTGCTGGCAGGACTCCCAGCACCTGGTGTGGAAGTAT  
ACTGTCTGTATGSGTGGGTCTGCCACACCCCGCACCTACATCTATGACCACAGTTTCCCCTACA  
AGGACCTGTGGCTGCACTCTATGAGGACGGTGTGACACAGTGGCCACACGTAGCACTGAGCTC  
TGTGGTCARTGGCAAGGCCGCA-----

TTAGAAAGGAGCCAACAGAGCAGATGGATTGAACGTAAGGAAACGTGTCATGATAGGCAGATTC  
CCAGTGCAGAGACAAAGGTAGATCTGAATGCTGATCCCGGCTGTGGGTGTAAAGAA-----  
-----

TGTTCTGAGAATCCAAGAAGTACCCAAGATGTTCCCTGGATAACTCTAAATAGCAGCATTTCAGA  
AAGTTAATGACTGGCTTACCAGAAGTATGATGATGCTAACTTCTGATGA-----  
CAGTGGGAAGTCTGAAACAAATGCTGAAGTAGATGGTACCTTAGAAGTTCCACATGAAGTAGAT  
GGATATTCTGGTCCTTCAAAGAAAATAAACTTACTGGCCACTGATCCTCATACTTCTTTAGAGAG  
TAAAAG-----

CCTCAAATAGTTTCAAGTAATATGGAAGATAAAATATTTGGTAAAACCTATC---  
GGAGGAGGACAAGCCTCCCTAATTTGAACCATGTACCTGAAAATCTAATAAGAATAGCACTTCCT  
ACAGAACCAAAGATA---CAGGAGCAACCT-----GGGA-----

CRCGGAGGCCCCAGCCGTCACCCCGACCCCGGACGTGGAGGACACACCCGGAGCCCCCGCTGCACGA  
CTTCTACTGCAGCAAGCTCCTGGACCTGGTGTTCCTGCTGGACGGCTCGGCCAGGCTGTCCGAGG  
CCGAGTTCGAGGAGCTCAAGGGCTTCGTGGTGTGAGCGTGATGGAGCGGCTGCACATCTCCAGAAG  
CGGATCCGCGTGGCCCTGGTGGAGTTCCACGACGGCTCGCACGCCTACCTCGAGCTCAGGGCCCGC  
CGGCGGCCGTCCGAGCTGCGGCGCGTGGCCAGCCACGTGAAGTACGTGGGCAGCCAGGTGGCGTC  
CACCAGCGAGGTGATGAAATACACGCTCTTCCAGATCTTCCGGCAAATCGATCGGCCCGAGGCCT  
CGCGCGTCACACTGCTCCTGACCGCCAGCCAGGAGCCGCCCGCCTGGCCCGCAACCTG-----  
GTCCGCTATCTC-----

CAGGGCTGGCAGCAGGCTTCCAGCATTTGTCAAAAACAGCCCAAGTACCTGAAATTGGGAGC  
TATTGATGTGAGCGCCTAAAGAACACACCAGTGAGATCTCCAGAAGGATCTCAGCAAAGGAGT  
CCCTCACACACCAGTGATTCTACAGCTACTTTCATCATAGATGGCATGCATTGTAAATCATGTGT  
GTCAAATATCGAAAGTGCTTTCTCTACACTCCAATATGTAAGCAGCATTTGTCGTTTCTTTAGAGA

ATAGGTCTGCCACTGTAAAATACAATGCAAGTTCAGTCACTCCAGAACTCTGAGAAAAGCAAT  
AGAGGCTGTCTCACCAGGACAATATAGAGTTAGCATTGCAAGTGAAGTTGAGAGTACTTCCAAC  
TCTT---  
CCTCTGCCACTTCTCCTCAAAAGACACCTTTGARTACAGTTAGCCAGCCTCTGACTCAGGAAACC  
CTGATAAACATTGTTGGCATGACTTGTAAATTCCTGCGTGCAGTCTATTGAGGGGGTCATATCAA  
AAAAGCCAGGTGTGAAATCCATC---  
CGCGTCTCCCTAGCAAACAGCAATGGGACTGTGGAGTATGATCCTCTACT-----  
-----GCAGAGTAACTGTCTCT-----  
GACCTTGTTTACTGGGAACTCTAACCAAGGCAGGCGATGCAGCGGTCTTCTAGTCACCAGTGTG  
GACTTGTGGAAGGGACATTTGTGACCTTA----  
AGAATCCAGTTTGTCTGAGTGTGTGAAATTGAATTGGGAATATTGTTCCAAGATTTGGAGTACG  
TTTCTGATCACATTTACCAAGATTACT-  
TCCACATATTTGTCAGTAGCATGCAAAAACAACAAAAACAATG--  
TTTGTGGCCCTTATGCCTCTACTTTTTCCAGGGAAGCTGCTAAAGAATGTGACGTCGAAAGAA  
AGAATATGTGAAATGTCTGGAAAGTCGAGTTGCAGTGTGGAAGTTCAGAAC-  
AAGAAGCTTATAGAGGAACCTGAAACC-----  
TTTTACAGTATGTCTCTTATTTGCAAGAACAACAAAAAGTGACTTTCCAGTGCACAGAGAAAG  
ACTTAGTAGGAGATGTTCTGAAGCCAGATATGGCCATTCCATTGATGTGGTGTATAGTCGAGG  
GAAAAGCATGGGTGTTCTCTTTGGAGGGAGGTCATATATACCTTTTACTCAAAGAACCACAGAA  
AAATGGAACAGTGTAGCTGATTGTCTGCCTTATGTTTTCTTGGTGGATTTTGAATTTGGGTGTA  
CTACATCATATAATTCTCCCTGAACCTCAGGATGGACTATCTTTCCATGTCTCTTGGCCAGAAAT  
GATACTGTTTATATTTTAGGAGGACATTCCTTGTACTAATAGTCGGCCTGCCAACCTATACAG  
AATAAAGGTTGACCTTCTTTGGGTAGCCAGCTGTGAATTGCACAGTCTTAGAGGAGACCCATG  
TTGGAGGCRTCAGTGAAGGGGAGAGTAGCCATGGTG---ATGGCTCTGAGTTTGATGAT---  
GAAGGAATGCAGAGTGATGATCCAGACAGCATGAAGA---  
GTGAGAGAGGCCACTCCAGGATTAGCAGCGCTGGCGTCAGGTCCAAGGGGTCCAAGAGGTCAGC  
GAGCAGTTGAGCCCTCRGGACTCAGGCCACATCCTATCAGTAGAGTATCCCAGCAGGAAGTTTTT  
CAGTAAATCTCGAATTTCTGAGGAAGATGGTAGACATGAGCTGGCTGAGAGCCGCTCTAGGGAG  
GAAGTCCAGAGTGAAGTGGGGGACGCTGACTCCAAGGCAGCTGGCCTCAGCCAATCCCGGGA  
GGACAGTCAGAATGACTCTCAGGAAGACAGCCCTCAGACTCAGTCTCAAGAAGACAGTCAAGAT  
GTCCAAGATTCCAGCAGTGAGTCCAGC---CAAGAAGATGACCTGCCAT

Cardiocranium\_paradoxus

CTCTTACCATCTTCGGCAACGCGCTGGTCATTCTGGCTGTGTTGACCAGCCGCTCGCTCCGCGCA  
CCACAGAACCTGTTTCTGGTGTGCTGGCTGCGGCGGACATCCTGGTGGCCACGCTCATCATTC  
CTTTTCTCTAGCCAACGAGCTGCTGGGCTACTGGTACTTCCGGCGCACCTGGTGGGAGGTCTACC  
TGGCGCTCGACGTGCTCTTCTGCACCTCGTCCATCGTGCACCTGTGTGCCATCAGTCTGGACCGGT  
ACTGGGCTGTGAGCCGCGCGCTGGAGTACAACCTCAAGCGAACCCCGCGCCGCATCAAATGCATC  
ATCCTCACCGTGTGGCTCATCGCGCCATCATCTCGCTGCCGCCCTCATCTACAAGGGCGATCAG  
GGTCCCCAACCCACGAGCGCCCCAGTGCAAGCTCAACCAAGAGGCCTGGTACATCTTGGCCTC  
CAGTATCGGGTCTTTCTTTGCACCCTGCCTCATCATG-ATCCTCGT-----  
TTCATGGACATGGAGTGTTCATGATTCTGAACCCAGCCAGCAGCTGGCCATCGCTGTGCTGTC  
CCTCACTCTGGGCACCTTCACAGTGCTCGAGAACCTGCTGGTGTGTGTGCATCCTGCACTCAC  
GCAGCCTCCGCTGCCGGCCTTCTACCATTTTATTGGCAGCCTGGCAGTGGCTGACCTCCTGGGCA  
GCGTCATTTTTGTCTACAGCTTCGTCGATTTCCATGTGTTCCACCGTAAAGATAGCCCCAATGTG  
TTTCTGTTCAAACCTGGGTGGGGTCACAGCCTCCTTACGGCCTCCGTAGGCAGCCTGTTCTCAC  
AGCCATCGACAGGTACATATCTATTACAGGCCCTGGCCTATAAGAGGATCGTCACCAGGCCCA

AGGCCGTGGTGGCCTTCTGCCTGATGTGGACCATTGCGATTGTCATTGCTGTGCTGCCCTCCTC  
GGCTGGAAGTGCACCTGATGAAAAGAGTGACGGATCAGACACGGACAGACTTCTCAACAGTGAC  
CA--  
TCAGAGATCTCTTAACATCCTTGGGGCCAAGGATGATGATTCTGGGCGTACCAGCTGTTATGATC  
CTGACATTCTGGAAACTGATTTCCCAGCCAGTGACATGTGTGATGGTGCCTTGGGGGTTGCTCAG  
CCACAAAGGTTAAAAGGGGAAGCTGATCTCTTGTGCCTTGACCAGAAAAATCAAATAACTTAC  
CTTA---TGATGCCTC---TG---CCACTCAGCAGCCCAGCGTTACCCTAAC---  
AGAGGAAGACAAACCACAACCACTTCTTATTAGTGAAACAGAGTCAACCCACCAACTTGCCTCCA  
TGCAGATGAGCCATCTTAGTTCACTGGCCAAACATTGACTTTTATGCCCAAGTAAGCGACATTACA  
CCAGCAGGGAGTGTAGTTCTTTCCCCAGGCCAAAAGCATAAGGCAGGGATGCCCCCTGCGACAT  
CATGC---  
ATCCAGAAGTGATCTCAGTCTGCCAAGCCAATTACAACATGGACAGTGCCTACTTCTGTGAGGCA  
GATGCCAAAAAGTGCATT-GCTGTGGCCCCCTCACAAGGAAGTCCAATCACATGTAGAG---  
CCCAGCTTTAAGCTATGAGCCCAGCAC--  
CCTCGAGACTTCTCAGCAAGGCTCAACATTCACCAACCTCACTCGCGATGCACTGCTGGTCCAGC  
TGCAGAAGAACGTTACCATGAGGTCTGGAGGGCAACGTGGGCTATCTACGCGTGGATGACCTC  
CCGGGCCAGGAGGTGCTGAGTGAGCTCGGGGGTTCCTGGTGGCTCACGTATGGAGGAAGCTCAT  
GGGCACCTCCGCCTTGGTGTGGATCTCCGCCACTGCACTGGAGGCCATGTGTCTGGTATCCCCT  
ACGTCATCTCCTATTTGCACCCGGGAATACAGTTGTCCATGTGGACACCATCTATGATCGCCCC  
TCCAACACCACCACGGAGATCTGGACCTTGCCAAGGTCTGGGAGAGAGGTTCAAGTGTGACAA  
GGATGTGGTGGTCTCACCAGCAGGCACACAGGAGGTGTGGCTGAAGACATCGCCTACATCCTCA  
AGCAGATGCGCAGAGCCATTGTGGTGGGTGAGCGGACTGAGGGGGGTGCCCTGGATCTCCAGAA-  
-----  
ACGACTTCCCCCTGGATGTTTCCCTCCCGCCAGGTGTGGCCTGAGGACCATGTGTTCAATTTCCACG  
CCAAGTTTCAACTACACAGCCCATGACTTTCAGCGCTTCTTTACGGACCTTCACTTTGAGGAAGG  
CTGGTACATGTGGCTACAGTCACGTGACCTGCTGGCAGGACTCCCAGCACCTGGTGTAGAAGTAT  
ATTGTCTGTATGGCGTGGGTCTGCCCACACCCCGCACCTACATCTATGACCACAGCTTCCCCCTACA  
AGGACCTGTGGCTGCGCTCTATGAGGACGGTGATGACACAGTAGCCACACGCAGCATGGAGCTC  
TGTGGCCGGTGGCAGGGCCACCA-----  
-----  
TTAGCAAGGATCCAACCAAGCAGATGGGCCAAAAGTAAGGAAGCATGTCATGATGGGCAGATTT  
CCAGTACTGAGAGGAAGGTGGGTTTGAAGTGTGGTCCCCTCTCTGGGAGACAGACATTGAATGA  
ACAGAGACCTCTATGCTCTGAGACTCCTGGAGATAATGAAGGTCTTGCTTGGTTAACCFAAACA  
GCAGCATTCTGAAAGTGAACGAGTGGTTTTCCAGAAGTGATGAGATGTTAACTTTTGTGATAC  
AGATGACATGAGGGGTGAGTCAAATG-----  
-----CTTCACTATGTCAAAGCGAAAGAGTCTGCTCCAAACC---  
AGAGAGTAATATCAAAGATAAAATATTTGGGAAAACCTATC---  
AGAAGAAGGTAGGCCTCCCCAACTTGAATCATGCAACTGCAAACCTAATTCAGGAGCATTGCT  
GCAGAACCACAAATAACACAAGAGCATCCCT-----GGTG-----  
CACGGATGTCCCCTCAGCCCTACCACCCATATGTAGAAGACACTCCTGAGCCCCCTGCACGA  
CTTCTACTGCAGCAAGCTGCTGGACCTGGTTTTTCTTGCTGGATGGCTCCTCAGGCTGTCTGAGG  
CTGAGTTTGAAGTGTCAAGGCCTTTGTGGTGTGAGCATGATGGAGAGGCTACACATCTCCCAGAAG  
CGCATCCGCGTGGCCGTGGTGGAGTACCACGACGGCTCCCACGCCTACATCGAGCTCAAGGCCCG  
GAAGCGGCCCTCAGAGCTGCGACGCATTGCCAGCCAGGTGATGTATGCTGGCAGCCAGGTGGCCT  
CCACCAGTGAGGTCTTGAAGTACACGCTGTTTTGAGATCTTTGGCAAAGTGCACCGGCCAGAAGCC  
TCCCGCATCACGCTGCTCCTCACCGCCAGCCAGGAGCCCCACGGATGGCCCGGAACCTG-----



GTCCGCTACGTC-----  
CAGGGCTTGGCTGTGGGCTTCCACGCATTTATCAAAAAACAGCCCAAGTACCTCAAGTTGGGAGC  
TATTGATGTGGAACGTCTAAAGAACACACCAGTCAAATCTCCAAAAGGATCACAGAAAAGGAGT  
CCCTCATCTACCAATGATTTAACGGCCACTTTCATCGTTGATGGCATGCATTGTAAATCGTGTGT  
GTCAAATATCGAGAGTGCTTTATCTACACTCCAGTATGTAAGCAGTATAGCAGTTTCTTTAGAG  
AATAGGTGTGCCATTGTAAAGTACAATGCCAGCTCTGCCACTCCAGAAACTGAGCAAAGCAAT  
AGAGGCTGTTTCACCAGGGCAATATAAAGTTAGTATTGCAAGTGATGTTGAAAGTACCTCCAAC  
TCTC---

CCTCCTCCTCATCTCTTCAAAAAGGTTCTTTGAACTTAGTTAGCCAGCCTCTGACTCAAGAACT  
GTGATAAATATTAGTGGGATGACTTGTAATCTTGTGTACAGTCTATAGAGGGTTTGATATCAA  
AAAGGCCAGGAGTAAAATCTATA---  
CGAGTCTCCCTTGCAAATAGCACTGGGACTGTTGAGTATGATCCACTGCT-----

-----  
GCAGAGTGAMTGCCCTTGGCCTGGACTTTGTTGACTGTGAACTCTAATCAAGGC-----  
-----TCTTGTAGAAGGGACACTTGTGACCCTAACTT-

AGAATCCMGTTTGGCTTAGCGTG-----  
TGAATTGGGAGTATTGTTCTGGGATTTGGAATGCAACTTTAATCACA-TTAGCAGGCTTACT-  
CTACTTTGTATGTCAATAGCATGCAA-A-----CATG-  
TTTTGTCTGCCCTCTTGCTTCTGCTTCTCCAGGGAAGCCGCCAAAGAATGTCGACGTAGGAAAA  
AAGAATATGTCAAATGTCTCGAGAGTCGGGTCGCAGTGCTGGAAGTCCAGAACAAGAAGCTTA  
TAGAGGAACTGGAAACC-----

CTATTGTTTCCAAGAACAACAAAAAAGTTACTTTCCACTGTACAGAGAAAGACCTGGTAGGAGA  
TGTTCTGAAGGTAGATATGGTCATTCCATTGATGTGGTATATAGTCGAGGGAAAAGTATGGGT  
GTTCTCTTTGGAGGGAGGTCCTACATGCCTTCTACCCAAAGAACCACAGAAACATGGAATAGGGT  
AGCTGACTGCCTGCCCCATGTTTTCTGGTGGATTTTGAATTTGGGTGTGCTACATCGTACATCC  
TTCCAGAACTTCAGGACGGGCTATCTTTTCATGTCTCTATTGCCAGAAATGATACCATTTACATT  
TTAGGAGGACACTCGCTTGCCAATAATATCCGCCCTGCTAATCTGTACAGAATAAGGGTTGATCT  
TCCCCTGGGTAGCCCAGCTGTGAGTTGTACAATCTTAGAGGAGCGTTGGGTGGGAGGTGGCAGCG  
AGGGAGACAGTAGCCACGGGG---ACGGGTCTGAGTCTGATGAT---  
GAAGGAATGCTGAGCGATGACCCAGATGGCACCAGGA---

GTGAGCGAAGCCACTCCAGGATGAGCGGCGCTGGTGTCCGGTCCAAGGAATCTAAAGGGGACAA  
TGAACCGGCCAGCACTGGGCACTCGGATGATAGCCAGCCCGTGGAGTACCCAGGCAGGAAGTTYT  
TGAGAAAGGCCCGCATTTCTGAGGAAGACCACAGAGGTCACCTTCTGACAGCAACACCAT---  
GGAAGTCCAGAGCGACTCCACAGAAAGCTCCAGGTCGCAGGAAGCTGGCCTGAGCCAATCCAGGG  
AGGAAAGTGACAGCGGCTCTCAGGATGACAGCGCAGAGAGCCCGTCCAGGAGGACAGCTCAGAC  
GGACAAGACTCCAGCAGTGAGTCCAGC---GAAGWGGGGGACCAGCCAT

*Allactaga\_tetradactyla* ---

TTCACCATTTTTCGGCAACGCGCTGGTCATTCTGGCTGTGATGACCAGCCGCTCGCTACGCGCACC  
ACAGAACCTGTTTCTGGTGTGCTGGCTGCTGCGGACATTCTGGTGGCCACGCTTATCATTCCTT  
TTTCTCTAGCCAACGAGCTGCTGGGCTACTGGTACTTCCGGCGCACTTGGTGGCAGGTCTACCTG  
GCGCTCGACGTGCTCTTCTGCACCTCGTCCATCGTGCACCTGTGTGCCATCAGTCTGGACCGGTAC  
TGGGCAGTGAGCCGCGGCTAGAGTACAACCTCCAAGCGCACCCCGCGCCGATCAAATGCATCAT  
CCTCACCGTGTGGCTCATCGCAGCCATCATCTCGCTGCCGCCCTCATCTACAAGGGTGATCAGGG  
CCCCAAACCCACGAACGCCCCCAATGCAAGCTCAACCAAGAGGCTGGTACATCTTGGCCTCCA  
GCATCGGGTCTTTTTTTTGCACCCTGCCTCATCATG-  
ATCCTCGTCTACCTAACTTCATGGACATGGAGTGCTTCATGATTCTGAACCCAGCCAGCAGCTG

GCCATTGCTGTGCTGTCCCTCACACTGGGCACCTTCACAGTCCTGGAGAACCTGCTGGTGTGCTGTG  
TGTCATCCTGCACTCACGCAGCCTCCGCTGCCGGCCTTCCTACCCTTCATTGGCAGCCTGGCAGT  
GGCTGACCTCCTGGGCAGCGTCATTTTTGTCTACAGCTTTGTGACTTCCATGTGTTCCACCGTA  
AAGATAGCCCCAATGTGTTTTCTGTTCAAACCTGGGCGGGGTACGGCCTCCTTCACAGCCTCCGTA  
GGCAGCCTGTTCCCTCACGGCCATCGACAGGTACATATCTATTACAGGCCCTGGCCTATAAGAG  
GATCGTCACCAGGCCAAGGCTGTGGTGGCCTTTTGTCTGATGTGGACCATCGCAATCGTCATTG  
CTGTGCTGCCCCCTCCTCGGATGGAACCTGCA-----  
AGAAGACTGAAGGATCAGACACGGACAGACTTCTAAACAATGACCA---  
TCAGAGATCACTTAACATCCTTGGGGCCAAGGATGATGATTCTGGGCGTACCAGCTGTTATGACC  
CTGACATTCTGGAAACTGATTTCCCATCCACTGACATGTGTGATGGTGCCTCAGGGGTGCTCAG  
CCACAGAGGTTAAAAGGGGAAGCTGATCTCTTGTGCCTTGATCAGAAAAATCAAATAACCTAC  
CTTA---TGATGCTTCTCCTG---CCACTCAGCCACCCAGCATTACCCTAAC---  
AGAGGAAGACAAACCATGGCCACTTCTTACTAGTGAAACAGAGTCAACCCACCAACTTGCTTCCA  
TGCAAATCAGCAATCCTAGTTCCTGGCCAACATTGACTTTTATGCCAAGTAAGTGACATTACA  
CCAGCAGGGAGTGTAGTCCTTTCTCCAGGCCAAAAGAGTAAGGCAGGGATACCCCATGCGACAT  
CATGC---  
ATCCAGAAGTGATCTCAGTCTGCCAAGACAATTACAACATGGACAATGCCTACTTCTGTGAGGCA  
GATGCCAAAAGCGCATTTGGCTGTGGCCCTCACATGGAAGTCAAATCACATG-----  
---GAGCCCAGCAC---  
CCTTGAGACTGCCAGCAAGCCTCAGCATTCCGCAACCTCACCCACGATGAACTGCTGATCCAGC  
TGCAGAAGAATATTCACCATGAGGTCTTGAGGGCAATGTGGGTTATCTACGAGTGGATGACCT  
CCCGGGCCAGGAGTACTGAGTGAACCTGGGGGATTCCCTGGTGGCTAACGTGTGGAAGAAGCTC  
ATGAGCACCTCCGCCTTGGTGTGATCTTCGCCACTGCACTAGAGGCCACGTCTCTGGCATCCCC  
TATGTGCTCTCTACCTGCACCCCGGAATACCGTCGTGCACGTGGACACCATCTATGATCGCCC  
TTCCAACACCACCAGGAGATCTGGACCTTGCCCAAGGTCCTGGGAGAGAGGTACAGTGCTGACA  
AGGACGTGGTGAATCTCACCAGTAGTCGCACAGGCGGGGTGGCCGAGGACATCGCCTACATCCTC  
AAGCAGATGCGCAGGGCCATTGTGGTGGGAGAGCGGACTGAGGGGGCGCCCTGGATCTCCAGA  
AGCTGATTGAGAGAGGGAGCAGCGCATAACGACGACTTCCCCCTGGATGTTTCCCTCCCGCCAGG  
TGTGGCCTGAGGACCATGTGTTCAATTTCCACGCCAAGCTTCAACTACACAGGCCATGACTTTCAG  
CGCTTCTTTACGGACCTTCACTTTGAGGAAGGCTGGTACATGTGGCTGCAGTCACGTGACCTGCT  
GGCAGGACTCCCAGCACCTGGTGTAGAAGTATACTGTCTGTATGGTGTGGGTCTGCCACACCTC  
GCACCTACATCTACGACCACAGCTTCCCCTACAAGGATCCTGTGGCTGCACTCTATGAGGACGGT  
GATGACACAGTAGCCACACGAAGCATGGAGCTCTGTGGCCAGTGGCAGGGCCCAATCACAACC  
TGTACGAACAGCAGTTTATTACTCACTAAAGACAGCGTGAATGTAGAAAAGGCCGAATTCTATA  
ATAAAAGCAAACACTCTGGCTTAGAAAAGGTTACAACAAACCAGATGGGCCAAAAGTAAGGAAGC  
ATGTCATGATGGGCAGATTGCCAGCACTGAGAGGAAAGTGGGTCTGAGTGCTGGTCCCCTCTCTG  
GGAGACTAGCATTGAATGAACAGAAATCTCTATGTGCCGAGACTCCTGCAGATAACGAAGATCT  
TGCTTGCTTAACCCGAAACAGCAGCATTCTGAAAGTGAACGAGTGGTTTTCTAGAAGTGATGAC  
TTGTAACT-----  
GATACAAACAACATGAGGGATAAATCAAATGCTGAAGTAACTGGGGCATTAGAAGTTTTCAATA  
CAGTAAGTGGATATTCTTATTTCCAAGAAAATGGGTGTTCCAGACACTGATCCTTGTCTGCT  
TTACTGTGTCAAAGTGAACAGTCTGCTCCAAACC---  
AGAGAGTAATATCAAAGATAAAATATTTGGGAAAATCTATCATAATAAGAAGGCAGGCCTCCCT  
AACTTGAACCGTGGACTGAAAATCTAATTCAGGAGCATTGTGCTGCAGAACGACAAATAACAC  
AAGAGCATTCCCTCCACAAATAAATAAGGCGTGCCCCCACAGATGTCCCAATCAGCCCTACCCT  
CCGTATATAGAAGACACACCCGAGCCACCCCTGCACAACCTTCTACTGCAGTAAGCTGCTGGATCT

GGTCTTCCTGCTGGACGGCTCCTCCCAGCTGTCTGAGGCTGAGTTTGAAGTGCTCAAGGCGTTTG  
TGGTAGGCACGATGGAGAGGCTGCACATCTCGCAGAAGCGCATCCGCGTGGCCGTCGTAGAGTAT  
CACGATGGTTCCACGCCTACATCGAGCTCAAGGCCCGAAACGGCCGTCAGAGCTGAGACACAT  
TGCCAGCCACGTGAAGTACGCTGGCAGCCAGGCGGCCTCCACTAGCGAGGTCTTGAAGTACACCT  
TGTTTCAAATATTCGGCAACATTGACCGGCCAGAAGCTTCCCGAATCACGCTGCTCCTCACTGCC  
AGCCAGGAGCCCCCGCGGATG--  
CAAGAAGCTACTGTTGTTTATCAACCTCATCTTATCACTGCAGAGGAAATAAAGAATCAGATTG  
AAGCTGTGGGCTTCCAAGCATTTATCAAAAAACAGCCCAAGTACCTCAAGTTGGGAGCTATTGAT  
GTGGAACGTCTGAAGAACACACCAGTCAAATCTCCAGAAGGGTCACATAAAAGGAGCCCTTCAT  
GTACCAATGATTTAACAATCACTTTCATCGTTGATGGCATGCATTGTAAATCATGTGTGTCAAAC  
ATTGAGAGTGCTTTATCTACACTCCAGTATGTAAGCCGCATAGCAGTTTCTTTAGAGAATAGGTC  
TGCCATCGTAAAGTACAATGCCAGCTCTGCCACTCCAGAAACACTGAGAAAAGCAATAGAGTCTG  
TTTACCAGGGCAATATAAAGTTAGCATTGCAAGTGATGTTGAAAGTACCTCCAACTCTC---  
CCTCCTCCTCATCTCTTCAAAAGTTTCCATTGAATATAGTTAGCCAGCCTCTGACTCAAGAACT  
GTGATAAATATTAGTGGAAATGACTTGTAATCTTGTGTACAGTCAATAGAGGGAATGATATCAA  
AAAGGCCAGGTGTAATAATCTATA---  
CGAGTCTCCCTTGCAAATAGCACTGGGACTGTTGAGTATGATCCACTGTAACTCTCCAGAAAC  
CTTGAGAGAAGCAATAGAAGACATGGGATTGCCCTCAAAGATCTTTATTGCCATAAAGCAGAGT  
GACTGTCCTTGGCCTGGACCTTGTGACTGTGAA--CTAATCAAGGC-----  
-TCTTGTAGAAGGGACACGTGTGGCCCTTACTT-AGAACCCAGTTTGGCTTAGTGTG-----  
TGAATTGAGAATATTGTTCTGGGATTTGGAATGCAACATTAATCACA-TTAGCAGGCTTACT-  
CTAATTTGTGTGTTGATAGCATGCAA-A-----CGTG-  
TTTTGTCTGCCCTTGTCTTCTACTTTCTCCAGGGAAGCCGCCAAAGAATGTCGACGTAGGAAAA  
AAGAGTATGTCAAATGTCTGGAGAGCCGAGTCGCAGTGCTGGAAGTCCAGAAC-  
AAGAAGCTTATAGAGGAGCTGAAACCTTGAAAGACATTTTCAGATAAGATTTATATCATGTCTA  
TTATTTGCAAGAACAACAAAAAAGTTACTTTCCACTGTACAGAGAAAGACTTAGTAGGAGATGT  
TCCTGAAGGTAGATATGGTCATCCATGGATGTGGT?TATAGTCGAGGGAAAAGTATGGGCGTTC  
TCTTTGGAGGGCGATCTTACATGCCTTCTACCCAAAGAACCACAGAAACATGGAATAGGGTAACT  
GACTGTCTGCCCCATGTTTTCCTGGTGGATTTTGAATTTGGGTGTGCTACATCATAACCTTCC  
AGAACTTCAGGATGGGCTGTCTTTCCATGTCTCTATTGCCAGAAATGATACCATTTACATTTAG  
GAGGACACTCGCTAGCCAGTAATATCCGCCCTGCTAATCTGTACAGAATAAGGGTTGATCTTCCC  
CTGGG-----  
-----  
-----  
-----  
-----

Stylodipus\_telum

CTCTTCACCATTTTCGGCAACGCGTTGGTCATTCTGGCAGTGTTGACCAGCCGCTCGCTACGCGC  
ACCACAGAACCTGTTTCTGGTGTGCTGGCTGCGGCGGACATCCTGGTGGCCACGCTTATCATTC  
CTTTTTCTCTAGCCAACGAGCTGCTGGGCTACTGGTACTTCCGGCGCACCTGGTGCAGGTCTAC  
CTGGCGCTCGACGTGCTCTTCTGCACCTCGTCCATCGTGCACCTGTGCGCCATCAGCCTGGACCGG  
TACTGGGACAGTGAGCCGCGCGCTGGAGTACAACCTCCAAGCGCACCCCGCGCCGCATCAAATGCAT  
CATCCTCACCGTGTGGTTCATCGCAGCCATCATCTCGCTGCCGCCCTCATCTACAAGGGCGACCA  
GGGCCCCAAACCCACGAGCGCCCCAATGCAAGCTCAACCAAGAGGCCTGGTACATCTTGGCCT  
CCAGCATCGGGTCTTTTTTTGCACCCTGCCTCATCATG-ATCCTCGT-----  
TTCATGGACATGGAGTGTTTCATGATTCTGAACCCAGCCAGCAGTTGGCCATTGCTGTGCTGTC

CCTCACACTGGGCACCTTCACAGTCCTGGAGAACCTTCTGGTGCTGTGTGTCATCCTGCATTAC  
GCAGCCTCCGCTGCCGGCCTTCTACCCTTTCATTGGCAGCCTGGCAGTGGCTGACCTCCTGGGCA  
GCGTCATTTTTGTCTACAGCTTTGTCGACTTCCATGTGTTCCACCGTAAGGATAGCCCCAATGTG  
TTTTCTGTTCAAACCTGGGTGGGGTCACGGCCTCCTTCACGGCCTCCGTAGGCAGCCTGTTCTCAC  
GGCCATCGACAGGTACATATCTATTACAGGCCCTGGCCTATAAGAGGATCGTCACCAGGCCCA  
AGGCCGTGGTGGCCTTTTGCCTGATGTGGACCATCGCAATTGTCATTGCTGTGCTGCCCTCCTC  
GGCTGGAAGTGCACCTGATGAAAAGACTGAAGGCTCAGACACGGACAGACTTCTCAACAATGACC  
A---

TCAGAGATCACTTAACATCCTTGGGGCCAAGGATGATGATTCTGGGGGTACCAGCTGTTATGACC  
CTGACATTCTGGAAACTGATTTCCCAGCCAGTGACATGTGTGATGGTGCCTCAGGGGTTGCTCAG  
CCACAGAGGTTAAAAGGGGAAGCTGATCTTGTGCCTTGATCAGAAAAATCAAACAACCTAC  
CTTA---TGATGCTTCTCCTG---CCACTCAGCAGCCAGCACTACCCTAAC---

AGAGGAAGACAAACCACAACCCTTCTTACTAGTGAAACAGAGTCAACCCACCAACTTGCCTCCA  
TGCAGATCAGCAATCCTAGTTCCCTGGCCAACATTGACTTTTATGCCAAGTAAGTGACATTACA  
CCAGCAGGGAGTGTAGTCCTTTCCCCAGGCCAAAAGAGCAAGGCAGGGATACCCCCATGCGACAT  
CATGC---

ATCCAGAAGTGATCTCAGTCTGCCAAGCCAATTACAACCTGGACAGTGCCTACTTCTGTGAGGCA  
GATGCCAAAAGTGCAAT-GCTGTGGCCCCTCACATGGAAGCCAAGTCACATGTAGAG---  
CCCAGCTTTAACCTATGAGCCCAGCAC---

CCTTGAGACGTCCCAGYAAACCTCAGCATTACCAACCTCACCCACGATGAACTGCTGCTCCAGG  
TGCAAAAARAACATTCGCCATGAGGTCTGGAGGGCAACGTGGGTTATCTACGAGTGGATGACCTC  
CCAGGCCAGGAGTACTGAGTGAACCTTGGGGAGTTCCTGGTGGCTCACGTGTGGAGGAAGCTCAT  
GGGCACTTCCGCCTTGGTACTGGATCTTCGCCACTGCACGGGGGGCCACGTCTCTGGCATCCCCTA  
TGTCATCTCCTATCTGCATCCCGGGAATACCGTTCGTGCACGTGGACACCATCTACGACCGCCCCTC  
CAACACCACCACGGAGATCTGGACCTTGCCCAAGGTCCTGGGAGAGAGGTACAGCGCTGACAAGG  
ACGTGGTGGTACTCACCAGCAGTCGCACGGGGGGCGTGGCCGAGGACATCGCCTACATCCTCAAG  
CAGATGCGCAGGGCCATCGTGGTGGGGCAGCGCACGGAGGGGGGCGCCCTGGACCTCCAGAA-----

-----  
-----  
-----  
-----

AAGGTGGGGCTGACTGCTGGTCCCCTCTCTGGGAGACAAACATTGAATGAGCAGAAACCTGTGTG  
CTCCGAGAATCCTGCAGGTAATGAAGGTCCTGCTTGGGTAACCCGAAACAGCAGCATTCTGAAGG  
TGAATGAGTGGTTTTCCAGAAGTGGTGAGTTGTTAACTTTTGTGATACAGACAGCGTGAGGGG  
TGAATCAAATGCCGAAGTAGCTGGGGCTGTACAAGTTGTTGGTGAAGTAAGCGGGTATTCCTGC  
TCTTCCAAGAGAACGGGTGTCCCGGACACAGATCCTTGTCTGCTGTACTATGTCAAAGTGAGAC  
CGTCTGCTCCAAACC---AGAGAGTAATATCAAAGATAAAAATATTTGGGAAAACCTATC---

ATAAGAAGGCAGGCCTCACCAACTTGAACCATGTGACTGAAAATCTAATTCAGGAGCATTGTGCT  
GCAGAACCACAAATAACACAAGAGCATCCCT-----GGTG-----

CACAGATGCCCCGCTCAGCTCAACCACGCCCTATGTGGAGGACACCCCCGAGCCACCCCTGCACGA  
CTTCCACTGCAGCAAGCTGCTGGATCTGGTCTTCCCTGCTGGACGGCTCCTCCAGGCTGTCCGAGG  
CCGAGTTTGAAGTGCTCAAGGCCTTCGTGGTGGAGCGGATGGAGAGRCTGCACATCTCCAGAAG  
CGCATCCGCGTGGCCGTGGTCCGAGTACCACGACGGCTCCCACGCCTACATCGAGCTCAGGGCCCG  
GAAGCGGCCCTCGGAGCTGCGCCACCTTGCCGGCCAGGTGAAGTATGTGGGCAGCCAGGTGGCCT  
CCACGAGTGAGGTCTTGAAGTACACCCTCTTCCAGATCTTTGGCAAGGTCGACCGGCCAGAAGCG

TCCCGCGTCGCGCTGCTCCTCACCGCCAGCCAGGAGCCCCACGCATGGCCCGCAACCTG-----  
GTCCGTTACGTC-----CAGGGCTTG-----

ATTTATATCATGTCTATTGTTTGAAGAACAACAAAAARTTACTTTCCACTGTACAGAGAAAG  
ACTTAGTAGGAGATGTTCCCTGAAGGTAGATACGGTCATTCCATTGATGTGGTGTATAGTCGAGG  
GAAAAGTATGGGTGTTCTCTTTGGAGGGCGGTCTACATGCCTTCTACCCAAAGAACCACAGAAA  
CATGGAATAGGGTAGCTGACTGCTTGCCCATGTTTTCTGGTAGATTTTGAATTTGCGTGTGCT  
ACATCATACATACTTCCAGAACTTCAGGATGGGCTATCTTTTCATGTCTCCATTGCCAGAAATGA  
TACCATTTACATTTTAGGAGGACACTCGCTTGCCAGTAATAGCCGCCCTGCCAATCTGTACAGAA  
TAAGGGTTGATCTTCCCCTGGGTAGCCCAGCTGTGAGTTGCACAATTTTA-----

*Allactaga\_balikunica*

CTCTTACCATTTTCGGCAACGCGCTGGTCATTCTGGCTGTGATGACCAGCCGCTCTCTACGCGC  
ACCACAGAACCTGTTTCTGGTGTGCTGGCTGCTGCAGACATCCTGGTGGCCACGCTTATCATTC  
CTTTTTCTCTAGCCAACGAGCTGCTGGGCTACTGGTACTTCCGGCGCACTTGGTGCAGGTCTAC  
CTGGCGCTCGACGTGCTCTTCTGCACCTCGTCCATCGTGCACCTGTGTGCCATCAGTCTGGACCGG  
TACTGGGCAGTGAGCCGCGCGCTAGAGTACAACCTCCAAGCGCACCCCGCGCCGCATCAAATGCAT  
CATCCTCACCGTGTGGCTCATCGCAGCCATCATCTCGCTGCCGCCCTCATCTACAAGGGCGATCA  
GGGCCCCCAAACCCACGAGCGCCCCCAATGCAAGCTCAACCAAGAGGCCTGGTACATCTTGGCCT  
CCAGCATCGGGTCTTTTTTTGCACCCTGCCTCATCATG-ATCCTCGT-----

TTCAAGGACATGGAGTGCTTCATGATTCTGAACCCAGCCAGCAGCTGGCCATCGCTGTGCTGTC  
CCTCACACTGGGCACCTTACAGTCTGGAGAACCTGCTGGTGTGTGTGCATCCTGCACTCAC  
GCAGCCTCCGCTGCCGGCCTTCCCTACCCTTCAATTGGCAGCCTGGCAGTGGCTGACCTCCTGGGCA  
GCGTCATTTTTGTCTACAGCTTTGTGCACTTCCATGTGTTCCACCGTAAAGATAGCCCCAATGTG  
TTTTCTGTTCAAGCTGGGCGGGGTCACGGCCTCCTTACAGCCTCCGTAGGCAGCCTGTTCCCTCACG  
GCCATCGACAGGTACATATCTATTACAGGCCCTGGCCTATAAGAGGATCGTCACCAGGCCCAA  
GGCCGTGGTGGCCTTTTGTCTGATGTGGACCATCGCAATTGTCATTGCTGTGCTGCCCTCCTCG  
GATGGAAGTGCACCTGATGAAAAGACTGAAGGATCAGACACGGACAGACTTCTAAACAATGACC  
A---

TCAGAGATCACTTAACATCCTTGGGGCCAAGGATGATGATTCTGGGCGTACCAGCTGTTATGACC  
CTGACATTCTGGAAACTGATTTCCCATCCAGTGACATGTGTGATGGTGCCTCAGGGGTGCGCTCAG  
CCACAGAGGTTAAAAGGGGAAGCTGATCTCTTGTGCCTTGATCAGAAAAATCAAATAACCTAC  
CTTA--TGATGCTTCTCCTG--CCACTCAGCAGCCAGCATTACCCTAAC--  
AGAGGAAGACAAACCACGGCCACTTCTTACTAGTGAAACAGAGTCAACCCACCAACTTGCTTCCA  
TGCAAATCAGCAATCCTAGTTCCCTGGCCAACATTGACTTTTATGCCAAGTAAGTGACATTACA

CCAGCAGGGAGTGTAGTCCTTTCTCCAGGCCAAAAGAGTAAGGCAGGGATACCCCCATGCGACAT  
CATGC---

ATCCAGAAGTGATCTCAGTCTGCCAAGACAATTACAACATGGACAATGCGTACTTCTGTGAGGTA  
GATGCCAAAAGTGCATT-GCTGTGGCCCCTCACATGGAAGTCAAATCACATGTAGAA---

CCCAGCTTTAACCTATGAGCCCAGCAC---

CCTTGAGACTGCCAGCAAGCCTCAGCATTCGCCAACCTCACCCACGATGAACTGCTGATCCAGC  
TGCAGAAGAATATTCACCATGACGTCTTGAGGGCAACGTGGGTATCTACGAGTGGATGACCTC  
CCGGGCCAGGAGGTAAGTGAACCTGGGGCATTCTGGTGGCTCACGTGTGGAAGAAGCTCAT  
GGGCACCTCCGCCTGGTGGTCTTGGCCACTGCACTAGAGGCCACGTCTCTGGCATCCCCTA  
TGTCGTCTCCTATCTGCACCCCGGAATACCGTTCGTGCACGTGGACACCATCTATGATCGCCCCTC  
CAACACCACCACGGAGATCTGGACCTTGCCCAAGGTCCTGGGAGAGAGGTACAGTGTGACAAGG  
ACGTGGTGGTTCTCACCAGTAGTCGCACAGGGGGGTAGCYGAGGACATCGCCTACATCCTCAAG  
CAGATGCGCAGGGCCATCGTGGTGGGGAGCGGACGGAGGGGGGCGCCCTGGATCTCCAGAA----

-----  
ACGACTTCCCCCTGGATGTTTCTTCCCGCCAGGTGTGGCCTGAGGACCATGTGTTCAATTTCCAC  
GCCAAGCTTCAACTACACAGGCCATGACTTTTACGCGCTTCTTTACGGACCTTCACTTTGAGGAAG  
GCTGGTACATGTGGCTACAGTCACGTGACCTGCTGGCAGGCCTCCAGCACCTGGTGTAGAAGTA  
TACTGTCTGTATGGCGTGGGTCTGCCACACCTCGCACCTACATCTATGACCACAGCTTCCCCTAC  
AAGGACCCTGTGGCTGCACTCTATGAGGACGGTGTGACACAGTAGCCACACGCAGCATGGAGCT  
CTGTGGCCAGTGGCAGGGCCGCCA-----

-----  
CTAGAAAGTTCCAACAAAGCAGATGGACCAAAGTAAGGAAGCATGTCATGATGGGCAGATTG  
CCAGCACCGAGAGGAAAGTGGGTCTGAGTGTGGTCCCCTTTCTGGGAGACTAGCATTGAATGA  
ACAGAAATCTCTATGTGCCGAGACTCCTGCAGATAACGAAGATCTTGCTTGCTTAACCCGAAACA  
GCAGCATTCTGAAAGTGAACGAGTGGCTTTCCAGAAGTGATGAGTTGTTAACT-----

GATACAAACAACATGAGGGGTAAATCAAATGCTGAAGTAACTGGGGCATTAGAAGTTTTCAATA  
AAGTAAGCGGAAATTCCTATTTCTTCCAAGAAAATGGGTGTATCAGACACTGATCCTTGTCTCTGT  
TTACTGTGTCAAAGTGAGACAGTCTGCTCCAAACC---

AGAGAGTAATATCAAAGATAAAATATTTGGGAAAATCTATC---

ATAAGAAGGCAGGCCTCCCCAACTTGAACCATGTGACTGAAAATCTAATTCAGGAGCATTGTCT  
ACAGAACGACAAATAACACAAGAGCATTCTCT-----GGTG-----

CACAGATGTCCCAGTCAGCCCTACCACCCGTATATAGAAGACACACCCGAGCCGCCCTGCACG  
ACTTCTACTGCAGTAAGCTGCTGGATCTGGTCTTCTCTGCTGGACGGCTCCTCCCAGCTGTCTGAG  
GCTGAGTTTGAAGTGTCAAGGCGTTTGTGGTCAAGCACCATGGAGAGGCTGCACATCTCGCAGAA  
GCGCATCCGCGTGGCCGTCGTGGAGTATCACGATGGTTCCACGCCTACATCGAGCTCAAGACCC  
GGAAACGGCCCTCAGAGCTGCGACACATTGCCAGCCACGTGAAGTACGCTGGCAGCCAGGTGGCC  
TCCACCAGCGAGGTGTTGAAGTACACCCTGTTTCAAATATTCGGCAACATTGATCGGCCGGAAGC  
TTCCCGCATCACGCTGCTCCTCACCGCCAGCCAGGAGCCCCCGGGATGGTCAGGAACCTG-----  
GTCCGCTACGTC-----

CAGGGCTTGGCTGTGGGCTTCCAAGCATTATCAAAAAACAGCCCAAGTACCTCAAGTTGGGAGC  
TATTGATGTGGAACGTCTAAAGAACACACCAGTCAAATCTCCAGAAGGGTCACATAAAAGGAGC  
CCTTCATGTACCAATGATTTAACGACCACTTTTCATCGTTGATGGCATGCATTGTAAATCGTGTGT  
GTCAAACATTGAGAGTGCTTTATCTACACTCCAGTATGTAAGCCACATAGCAGTTTCTTTAGAGA  
ATAGGTCTGCCATCGTAAAGTACAATGCCAGCTCTGCCACTCCAGAAACACTAAGAAAAGCAATA  
GAGTCTGTTTACCAGGGCAATATAAAGTTAGCATTGCAAGTGTGTTGAAAGTACCTCCAACCTC  
TC---







-----  
-----  
CCTGATGAAAAGACTGAAGGATCAGACACGGACAGACTTCTAAACAATGACCA---  
TCAGAGATCACTTAACATCCTTGGGGCCAAGGATGATGATTCTGGGCGTACCAGCTGTTATGACC  
CTGACATTCTGGAAACTGATTTCCCATCCAGTGACATGTGTGATGGTGCCTCAGGGGTGCTCAG  
CCACAGAGGTTAAAAGGGGAAGCTGATCTCTTGTGCCTTGATCAGAAAAATCAAATAACCTAC  
CTTA---TGATGCTTCTCCTG---CCACTCAGCAGCCCAGCATTACCCTAAC---  
AGAGGAAGACAAACCACGGCCACTTCTTACTAGTGAAACAGAGTCAACCCACCAACTTGCTTCCA  
TGCAAATCAGCAATCCTATTTCCCTGGCCAACATTGACTTTTATGCCCAAGTAAGTGACATTACA  
CCAGCAGGGAGTGTAGTCCTTTCTCCAGGCCAAAAGAGTAAGGCAGGGATACCCCATGCGACAT  
CATGC---  
ATCCAGAAGTGATCTCAGTCTGCCAAGACAATTACAACATGGACAATGCGTACTTCTGTGAGGTA  
GATGCCAAAAAGTGCATT-GCTGTGGCCCCTCACATGGAAGTCAAATCACATGTAGAA---  
CCCAGCTTTAACCTATGAGCCCAGCAC---  
CCTTGAGACTGCCCAGCAAGCCTCAGCATTCGCCAACCTCACCCACGATGAACTGCTGATCCAGC  
TGCAGAAGAATATTCACCATGACGTCTTGAGGGCAACGTGGGTTATCTACGAGTGGATGACCTC  
CCGGGCCAGGAGTACTGAGTGAACCTTGGGGCATTCTGGTGGCTCACGTGTGGAAGAAGCTCAT  
GGGCACCTCCGCCTTGGTGTGGATCTTCGCCACTGCACTAGAGGCCACGTCTCTGGCATCCCCTA  
TGTCGTCTCCTATCTGCACCCCGGGAATACCGTTCGTGCACGTGGACACCATCTATGATCGCCCCTC  
CAACACCACCACGGAGATCTGGACCTTGCCCAAGGTCCTGGGAGAGAGGTACAGTGTGACAAGG  
ACGTGGTGGTTCTCACCAGTAGTCGCACAGGGCGGGGTGGCCGAGGACATCGCCTACATCCTCAAG  
CAGATGCGCAGGGCCATCGTGGTGGGAGAGCGGACGGAGGGGGGCGCCCTGGATCTCCAGAA-----  
-----  
-----  
-----

-----  
-----  
TTAGAAAGGTTCCAACAAAGCAGATGGACCAAAGTAAGGAAGCATGTCATGATGGGCAGATTG  
CCAGCACCGAGAGGAAAGTGGGTCTGAGTGTGGTCCCCTCTCTGGGAGACTAGCATTGAATGAA  
CAGAAATCTYTATGTGCCRAGACTCCTGCAGATAACGAAGATCTTGCTTGCTTAACCCGAAACAG  
CAGCATTCTGAAAGTGAACGAGTGGCTTTCCAGAAGTGATGAGTTGTAACT-----  
GATACAAACAACATGAGGGGTAAATCAAATGCTGAAGTAACTGGGGCATTAGAAGTTTTCAATA  
AAGTAAGCGGAAATTCCTATTCTTCCAAGAAAATGGGTGTATCAGACACTGATCCTTGTCTGCT  
TTACTGTGTCAAAGTGAGACAGTCTGCTCCAAACC---  
AGAGAGTAATATCAAAGATAAAATATTTGGGAAAATCTATC---  
ATAAGAAGGCAGGCCTCCCCAACTTGAACCATGTGACTGAAAATCTAATTCCAGGAGCATTGCT  
ACAGAACGACAAATAACACAAGAGCATTCC-----GGTG-----  
CACAGATGTCCCAATCAGCCCTACCACCCGTATGTAGAAGACACCCCCGAGCCGCCCTGCACGA  
CTTCTACTGCAGTAAGCTGCTGGATCTGGTCTTCCCTGCTGGACGGCTCCTCCCAGCTGTCYGAGG  
CTGAGTTTGAAGTGTCAAGGCGTTTGTGGTCAGCACAATGGAGAGGCTGGACATCTCGCAGAA  
GCGCRTCCGCGTGGCCGTCTGAGTATCACGATGGTTCACGCCTACATCGAGCTCAAGACCC  
GGAAACGGCCCTCAGAGCTGCGACACATTGCCAGCCACGTGAAGTACGCTGGCAGCCAGGAGGCC  
TCCACCAGCGAGGTCTTGAAGTACACCCTGTTTCAAATATTCGGCAACATTGATCGGCCAGAAGC  
TTCCCGCATCACGCTGCTCCTCACCGCCAGCCAGGAGCCCCGCGGATGGTCAGGAACCTG-----  
GTCCGCTACGTC-----CAGGGCTTG-----  
-----  
-----



[Unless the parameters are explicitly unlinked, they will be shared across partitions.  
The unlink command is used to unlink the parameters.]

```
unlink shape=(all) pinvar=(all) statefreq=(all) revmat=(all);
```

```
[ADD A CLOCK RATE]
```

```
constraint root = 1 2 3 4 5 6 7 8 9 10 11 12 13 14 15 16 17 18 19 20 21 22 23 24 25  
26 27 28;
```

```
constraint ingroup = 1 2 3 4 5 6 7 8 9 10 11 12 13 14 15 16 17 18 19 20 21 23 24 25  
26 27 28;
```

```
constraint Dipodidae = 3 4 5 6 7 8 9 10 11 12 13 14 15 16 17 18 19 23 24 25 26 27  
28;
```

```
constraint mouse.rat = 1 2;
```

```
constraint cardiocraniine = 19 23;
```

```
constraint Dipodinae.Allactaginae = 6 7 8 9 10 11 12 13 15 16 17 18 24 25 26 27 28;
```

```
constraint Jaculus = 15 16 27;
```

```
[constraint <name of constraint> <type of constraint> = <taxa>]
```

```
prset topologypr = constraints(root, ingroup, Dipodidae, mouse.rat, cardiocraniine,  
Dipodinae.Allactaginae, Jaculus);
```

[node calibrations. The offset exponential distribution has its expectation at the  
minimum age and mean. That is, the

offsetexponential(300,325) has the minimum 300 and an exponential mean of 325.  
branch lengths in millions of years]

```
calibrate root = offsetexponential(55.8, 59); [Calibrations taken from Date-a-Clade]
```

```
calibrate Dipodidae = offsetexponential(43, 47); [Calibrations taken from Wu et al  
2012, PLoS One]
```

```
calibrate mouse.rat = offsetexponential(7.3, 9); [Calibrations taken from Wu et al  
2012, PLoS One]
```

```
calibrate cardiocraniine = offsetexponential(9, 11); [Calibrations taken from Wu et  
al 2012, PLoS One]
```

```
calibrate Dipodinae.Allactaginae = offsetexponential(10.5, 13); [Calibrations taken  
from Wu et al 2012, PLoS One]
```

```
prset applyto = (all) ratepr = variable;
```

```
prset brlenspr = clock: uniform; [need uniform clock when you include fossil  
species]
```

```
prset nodeagepr = calibrated;
```

```
prset clockratepr = normal(0.2, 0.02);
```

```
[normal(mean, variance)]
```

```
prset clockvarpr = igr;
```

```
prset lgrvarpr = exponential(0.8);
```

```
[The following line allows rates to vary across partitions]
```

```
prset ratepr=variable;
```

```
mcmcprngen=10000000 nchains=4 nruns=2 printfreq=1000 samplefreq=1000;
```

end;
